# Supplementary material
Source: publisher figshare collection journal article supplement (https://gsajournals.figshare.com/ndownloader/files/24121466)
Supplement: Supplementary file 1 [file 24121466]

## Sheet: Table S1A gene list
VDRC_ID	Construct	Flybase_ID	Symbol	CG_ID	EGFR	EGFR Met	YKI	YKI Met	SOCS	40D Status	Description	Flybase html	OMIM URL	1° human ortholog	Human orthologs
101524	108966	FBgn0000273	Pka-C1	CG4379	Positive	No	Positive	No	Negative		Protein kinase, cAMP-dependent, catalytic subunit 1 [Acc:FBgn0000273]	http://flybase.org/reports/FBgn0000273	http://omim.org/entry/176892	PRKACB	PRKX, PRKACG, PRKACA, PRKACB
108863	101190	FBgn0001075	ft	CG3352	Positive	No	Positive	No	Negative	N	fat [Acc:FBgn0001075]	http://flybase.org/reports/FBgn0001075.html	http://www.omim.org/entry/612411	FAT4	FAT3, DCHS2, FAT2, DCHS1, FAT4
109281	100573	FBgn0004583	ex	CG4114	Positive	No	Positive	No	Negative	N	expanded [Acc:FBgn0004583]	http://flybase.org/reports/FBgn0004583.html		FRMD1	FRMD6, FRMD1
107320	108799	FBgn0010415	Sdc	CG10497	Positive	No	Positive	No	Negative		Syndecan [Acc:FBgn0010415]	http://flybase.org/reports/FBgn0010415.html	http://www.omim.org/entry/186357	SDC2	SDC4, SDC1, SDC3, SDC2
107413	100675	FBgn0010825	Gug	CG6964	Positive	No	Positive	No	Negative	Y	Grunge [Acc:FBgn0010825]	http://flybase.org/reports/FBgn0010825.html	http://www.omim.org/entry/605226	RERE	ATN1, RERE
101912	110219	FBgn0011239	ms(2)35Ci	CG31733	Positive	No	Positive	No	Negative		male sterile (2) 35Ci [Acc:FBgn0011239]	http://flybase.org/reports/FBgn0011239.html
102026	110413	FBgn0011555	thetaTry	CG12385	Positive	No	Positive	No	Negative	N	thetaTrypsin [Acc:FBgn0011555]	http://flybase.org/reports/FBgn0011555.html
111002	101055	FBgn0011739	wts	CG12072	Positive	No	Positive	No	Negative	Y	warts [Acc:FBgn0011739]	http://flybase.org/reports/FBgn0011739.html	http://omim.org/entry/603473	LATS1	LATS2, LATS1
101887	110138	FBgn0024250	brk	CG9653	Positive	No	Positive	No	Negative	N	brinker [Acc:FBgn0024250]	http://flybase.org/reports/FBgn0024250.html
102373	111596	FBgn0025676	CkIIalpha-i3	CG3217	Positive	No	Positive	No	Negative	N	CKII-alpha subunit interactor-3 [Acc:FBgn0025676]	http://flybase.org/reports/FBgn0025676.html
101475	109278	FBgn0026379	Pten	CG5671	Positive	No	Positive	No	Negative	N	Phosphatase and tensin homolog [Acc:FBgn0026379]	http://flybase.org/reports/FBgn0026379.html	http://www.omim.org/entry/601728	PTEN	PTEN
104176	106394	FBgn0032401	Plzf	CG6792	Positive	No	Positive	No	Negative	N	Promyelocytic leukemia zinc finger [Acc:FBgn0032401]	http://flybase.org/reports/FBgn0032401.html	http://www.omim.org/entry/604084	ZBTB17	ZBTB17
102143	110903	FBgn0034666	CG9294	CG9294	Positive	No	Positive	No	Negative			http://flybase.org/reports/FBgn0034666.html	https://www.omim.org/entry/609862
108601	101619	FBgn0036195	Dnai2	CG6053	Positive	No	Positive	No	Negative	Y	dynein, axonemal, intermediate chain 2 [Acc:FBgn0036195]	http://flybase.org/reports/FBgn0036195.html	http://omim.org/entry/605483	DNAI2	DNAI2
104975	112677	FBgn0037410	Osi2	CG1148	Positive	No	Positive	No	Negative	Y	Osiris 2 [Acc:FBgn0037410]	http://flybase.org/reports/FBgn0037410.html
102793	112453	FBgn0038084	beat-Vc	CG14390	Positive	No	Positive	No	Negative	Y		http://flybase.org/reports/FBgn0038084.html	http://www.omim.org/entry/605686
103727	102192	FBgn0038640	CG7706	CG7706	Positive	No	Positive	No	Negative	N		http://flybase.org/reports/FBgn0038640.html	http://www.omim.org/entry/602655	SLC4A1AP	SLC4A1AP
100838	103662	FBgn0052816	CG32816	CG32816	Positive	No	Positive	No	Negative	Y		http://flybase.org/reports/FBgn0052816.html
104169	101704	FBgn0261456	hpo	CG11228	Positive	No	Positive	No	Negative		hippo [Acc:FBgn0261456]	http://flybase.org/reports/FBgn0261456.html	http://www.omim.org/entry/605030	STK3	MAP4K2, MAP4K3, STK24, MAP4K1, STK25, STK4, STK3
106404	111691	FBgn0263102	psq	CG2368	Positive	No	Positive	No	Negative	Y	pipsqueak [Acc:FBgn0263102]	http://flybase.org/reports/FBgn0263102.html
101760	109442	FBgn0000039	nAChRalpha2	CG6844	Positive	No	Negative	-	Negative		nicotinic Acetylcholine Receptor alpha2 [Acc:FBgn0000039]	http://flybase.org/reports/FBgn0000039.html	http://www.omim.org/entry/118502	CHRNA2	CHRND, CHRNB1, CHRNG, CHRNE, CHRNB2, CHRNA1, CHRNB3, CHRNB4, CHRNA5, CHRNA6, CHRNA4, CHRNA3, CHRNA2
106575	113366	FBgn0003377	Sgs7	CG18087	Positive	No	Negative	-	Negative		Salivary gland secretion 7 [Acc:FBgn0003377]	http://flybase.org/reports/FBgn0003377.html
104620	111245	FBgn0004858	elB	CG4220	Positive	No	Negative	-	Negative		elbow B [Acc:FBgn0004858]	http://flybase.org/reports/FBgn0004858.html	http://www.omim.org/entry/613902	ZNF703	ZNF503, ZNF703
100157	105086	FBgn0011695	EbpIII	CG11390	Positive	Yes	Negative	-	Negative		Ejaculatory bulb protein III [Acc:FBgn0011695]	http://flybase.org/reports/FBgn0011695.html
103936	102855	FBgn0014427	CG11899	CG11899	Positive	No	Negative	-	Negative			http://flybase.org/reports/FBgn0014427.html	http://www.omim.org/entry/610936	PSAT1	PSAT1
100697	107896	FBgn0015245	Hsp60A	CG12101	Positive	Yes	Negative	-	Negative		Heat shock protein 60A [Acc:FBgn0015245]	http://flybase.org/reports/FBgn0015245.html	http://www.omim.org/entry/118190	HSPD1	HSPD1
102206	111096	FBgn0020372	TM4SF	CG11303	Positive	No	Negative	-	Negative		Transmembrane 4 superfamily [Acc:FBgn0020372]	http://flybase.org/reports/FBgn0020372.html
101542	109002	FBgn0023212	EloB	CG4204	Positive	No	Negative	-	Negative		Elongin B [Acc:FBgn0023212]	http://flybase.org/reports/FBgn0023212.html	http://www.omim.org/entry/600787	ELOB	ELOB
100916	106222	FBgn0029501	Crtp	CG13580	Positive	No	Negative	-	Negative		Caldesmon-related protein [Acc:FBgn0029501]	http://flybase.org/reports/FBgn0029501.html	http://www.omim.org/entry/614848
107361	106220	FBgn0029950	CG9657	CG9657	Positive	No	Negative	-	Negative			http://flybase.org/reports/FBgn0029950.html	http://www.omim.org/entry/608044	SLC5A8	SLC5A6, SLC5A5, SLC5A8, SLC5A12
104954	112463	FBgn0030715	Or13a	CG12697	Positive	No	Negative	-	Negative		Odorant receptor 13a [Acc:FBgn0030715]	http://flybase.org/reports/FBgn0030715.html	http://www.omim.org/entry/603063
108491	111911	FBgn0030775	CG9673	CG9673	Positive	No	Negative	-	Negative			http://flybase.org/reports/FBgn0030775.html
110777	108158	FBgn0031700	CG14022	CG14022	Positive	No	Negative	-	Negative			http://flybase.org/reports/FBgn0031700.html	http://www.omim.org/entry/102595	ACYP2	ACYP1, ACYP2
105773	109683	FBgn0031739	CG14005	CG14005	Positive	No	Negative	-	Negative			http://flybase.org/reports/FBgn0031739.html		MSANTD1	MSANTD1
102753	112348	FBgn0031942	CG7203	CG7203	Positive	No	Negative	-	Negative			http://flybase.org/reports/FBgn0031942.html
102002	108992	FBgn0032516	Ing5	CG9293	Positive	No	Negative	-	Negative		Inhibitor of growth family member 5 [Acc:FBgn0032516]	http://flybase.org/reports/FBgn0032516.html	http://www.omim.org/entry/608524	ING4	ING3, ING1, ING2, ING5, ING4
101907	110199	FBgn0033140	CG12836	CG12836	Positive	No	Negative	-	Negative			http://flybase.org/reports/FBgn0033140.html	http://www.omim.org/entry/186977	TCTE3	TCTEX1D2, TCTE3
104329	107549	FBgn0033885	DJ-1alpha	CG6646	Positive	No	Negative	-	Negative			http://flybase.org/reports/FBgn0033885.html	http://www.omim.org/entry/602533	PARK7	PARK7
106633	107415	FBgn0034242	CG14480	CG14480	Positive	No	Negative	-	Negative			http://flybase.org/reports/FBgn0034242.html	https://www.omim.org/entry/617766	FAM192A	FAM192A
106485	108177	FBgn0035587	Gdap1	CG4623	Positive	No	Negative	-	Negative			http://flybase.org/reports/FBgn0035587.html	http://www.omim.org/entry/606598	GDAP1	GDAP1L1, GDAP1
101457	109214	FBgn0035624	Eaf6	CG12756	Positive	No	Negative	-	Negative		Esa1-associated factor 6 [Acc:FBgn0035624]	http://flybase.org/reports/FBgn0035624.html	http://www.omim.org/entry/611001	MEAF6	MEAF6
107823	108429	FBgn0035772	Sh3beta	CG8582	Positive	No	Negative	-	Negative			http://flybase.org/reports/FBgn0035772.html	http://www.omim.org/entry/602230	SH3BGR	SH3BGRL3, SH3BGRL2, SH3BGRL, SH3BGR
103506	112353	FBgn0036128	Elo68beta	CG11801	Positive	No	Negative	-	Negative		Elongase 68beta [Acc:FBgn0036128]	http://flybase.org/reports/FBgn0036128.html	https://www.omim.org/entry/605512	ELOVL4	ELOVL1, ELOVL7, ELOVL5, ELOVL2, ELOVL4
101148	105003	FBgn0036242	CG6793	CG6793	Positive	No	Negative	-	Negative			http://flybase.org/reports/FBgn0036242.html	http://www.omim.org/entry/602162
102064	110581	FBgn0036620	CG4842	CG4842	Positive	No	Negative	-	Negative			http://flybase.org/reports/FBgn0036620.html	http://www.omim.org/entry/601688	HPGD	HPGD
103255	112675	FBgn0036951	CG7017	CG7017	Positive	No	Negative	-	Negative			http://flybase.org/reports/FBgn0036951.html	http://www.omim.org/entry/602108
110289	105710	FBgn0037141	DNApol-eta	CG7143	Positive	No	Negative	-	Negative			http://flybase.org/reports/FBgn0037141.html	http://www.omim.org/entry/603968	POLH	POLI, POLH
110651	108402	FBgn0037186	CG11241	CG11241	Positive	No	Negative	-	Negative			http://flybase.org/reports/FBgn0037186.html	http://www.omim.org/entry/612471	AGXT2	PHYKPL, ETNPPL, AGXT2
100350	106014	FBgn0037483	CG14609	CG14609	Positive	No	Negative	-	Negative			http://flybase.org/reports/FBgn0037483.html	http://www.omim.org/entry/612516
107280	102622	FBgn0037816	CG6345	CG6345	Positive	No	Negative	-	Negative			http://flybase.org/reports/FBgn0037816.html	http://omim.org/entry/608200	CDK5RAP1	CDK5RAP1
109328	106636	FBgn0037844	CG4570	CG4570	Positive	No	Negative	-	Negative			http://flybase.org/reports/FBgn0037844.html
105629	100910	FBgn0038115	CG7966	CG7966	Positive	No	Negative	-	Negative			http://flybase.org/reports/FBgn0038115.html	http://www.omim.org/entry/604188	SELENBP1	SELENBP1
108279	106737	FBgn0038535	alt	CG18212	Positive	No	Negative	-	Negative		aluminum tubes [Acc:FBgn0038535]	http://flybase.org/reports/FBgn0038535.html	http://www.omim.org/entry/601418	RRBP1	RRBP1
108080	100140	FBgn0038965	mats	CG13852	Positive	No	Negative	-	Negative		mob as tumor suppressor [Acc:FBgn0038965]	http://flybase.org/reports/FBgn0038965.html	https://www.omim.org/entry/609282	MOB1B	MOB3C, MOB3B, MOB3A, MOB1A, MOB1B
101205	107142	FBgn0039203	CG13618	CG13618	Positive	No	Negative	-	Negative			http://flybase.org/reports/FBgn0039203.html
105784	110495	FBgn0039807	CG15546	CG15546	Positive	No	Negative	-	Negative			http://flybase.org/reports/FBgn0039807.html
101127	106993	FBgn0040343	CG3713	CG3713	Positive	No	Negative	-	Negative			http://flybase.org/reports/FBgn0040343.html
100783	108595	FBgn0043456	CG4747	CG4747	Positive	No	Negative	-	Negative			http://flybase.org/reports/FBgn0043456.html	http://www.omim.org/entry/610660	GLYR1	GLYR1
105516	113260	FBgn0044049	Ilp4	CG6736	Positive	No	Negative	-	Negative		Insulin-like peptide 4 [Acc:FBgn0044049]	http://flybase.org/reports/FBgn0044049.html	https://www.omim.org/entry/146738	INSL3	INSL3
102416	111624	FBgn0051053	CG31053	CG31053	Positive	No	Negative	-	Negative			http://flybase.org/reports/FBgn0051053.html	http://www.omim.org/entry/612041	RNF212B	RNF212, RNF212B
103622	101787	FBgn0051852	Tap42	CG31852	Positive	Yes	Negative	-	Negative		Two A-associated protein of 42kDa [Acc:FBgn0051852]	http://flybase.org/reports/FBgn0051852.html	http://omim.org/entry/300139	IGBP1	IGBP1
107437	106582	FBgn0051926	CG31926	CG31926	Positive	No	Negative	-	Negative			http://flybase.org/reports/FBgn0051926.html	http://www.omim.org/entry/169740	REN	PGA3, PGA4, PGC, CTSE, PGA5, REN, CTSD, NAPSA
106263	103870	FBgn0052483	CG32483	CG32483	Positive	No	Negative	-	Negative			http://flybase.org/reports/FBgn0052483.html		SCPEP1	SCPEP1
104225	105947	FBgn0053680	CG33680	CG33680	Positive	No	Negative	-	Negative			http://flybase.org/reports/FBgn0053680.html
104089	102456	FBgn0086347	Myo31DF	CG7438	Positive	No	Negative	-	Negative		Myosin 31DF [Acc:FBgn0086347]	http://flybase.org/reports/FBgn0086347.html	http://www.omim.org/entry/606539	MYO1D	MYO1H, MYO1B, MYO1C, MYO1A, MYO1F, MYO1E, MYO1G, MYO1D
105986	101947	FBgn0260749	Utx	CG5640	Positive	No	Negative	-	Negative		Utx histone demethylase [Acc:FBgn0260749]	http://flybase.org/reports/FBgn0260749.html	http://www.omim.org/entry/400009	UTY	KDM6B, KDM6A, UTY
103539	114364	FBgn0262104	CG42857	CG42857	Positive	No	Negative	-	Negative			http://flybase.org/reports/FBgn0262104.html
100817	108805	FBgn0262734	eIF4H1	CG4429	Positive	No	Negative	-	Negative	N	eukaryotic translation initiation factor 4H1 [Acc:FBgn0262734]	http://flybase.org/reports/FBgn0262734.html	http://www.omim.org/entry/603431	EIF4H	EIF4B, EIF4H
100708	108017	FBgn0264959	Src42A	CG44128	Positive	No	Negative	-	Negative		Src oncogene at 42A [Acc:FBgn0264959]	http://flybase.org/reports/FBgn0264959.html	https://www.omim.org/entry/606573	FRK	SRC, FGR, YES1, PTK6, SRMS, FYN, FRK
101925	110256	FBgn0283521	lola	CG12052	Positive	No	Negative	-	Negative		longitudinals lacking [Acc:FBgn0283521]	http://flybase.org/reports/FBgn0005630.html	http://www.omim.org/entry/606025
101482	109308	FBgn0052230	ND-MLRQ	CG32230	Positive	No	nd	-	Negative		NADH dehydrogenase (ubiquinone) MLRQ subunit [Acc:FBgn0052230]	http://flybase.org/reports/FBgn0052230.html	http://www.omim.org/entry/603833	NDUFA4	NDUFA4L2, NDUFA4
101480	109294	FBgn0003090	pk	CG11084	Positive	No	nd	-	nd		prickle [Acc:FBgn0003090]	http://flybase.org/reports/FBgn0003090.html	http://www.omim.org/entry/608501	PRICKLE2	PRICKLE4, PRICKLE3, PRICKLE2, PRICKLE1
101611	105198	FBgn0051493	CG31493	CG31493	Positive	No	nd	-	nd			http://flybase.org/reports/FBgn0036596.html
101407	109077	FBgn0000037	mAChR-A	CG4356	Negative	-	Positive	No	Negative	N	muscarinic Acetylcholine Receptor, A-type [Acc:FBgn0000037]	http://flybase.org/reports/FBgn0000037.html	http://www.omim.org/entry/118510	CHRM1	CHRM2, CHRM4, CHRM5, CHRM3, CHRM1
100598	108384	FBgn0000179	bi	CG3578	Negative	-	Positive	No	Negative		bifid [Acc:FBgn0000179]	http://flybase.org/reports/FBgn0000179.html	http://www.omim.org/entry/600747	TBX2	TBX6, TBX15, TBX1, TBX18, TBX5, TBX4, EOMES, TBX21, TBR1, TBX3, TBX2
102527	111895	FBgn0000228	Bsg25D	CG14025	Negative	-	Positive	No	Negative	Y	Blastoderm-specific gene 25D [Acc:FBgn0000228]	http://flybase.org/reports/FBgn0000228.html	http://www.omim.org/entry/608684	NIN	NINL, NIN
102367	111578	FBgn0000357	Cp18	CG6517	Negative	-	Positive	No	Negative	N	Chorion protein 18 [Acc:FBgn0000357]	http://flybase.org/reports/FBgn0000357.html
108352	108627	FBgn0000382	csw	CG3954	Negative	-	Positive	No	Negative	N	corkscrew [Acc:FBgn0000382]	http://flybase.org/reports/FBgn0000382.html	http://www.omim.org/entry/176876	PTPN11	PTPN6, PTPN11
104650	111708	FBgn0000451	ect	CG6611	Negative	-	Positive	No	Negative	Y	ectodermal [Acc:FBgn0000451]	http://flybase.org/reports/FBgn0000451.html
103784	102681	FBgn0000536	eas	CG3525	Negative	-	Positive	No	Negative	N	easily shocked [Acc:FBgn0000536]	http://flybase.org/reports/FBgn0000536.html	http://www.omim.org/entry/609858	ETNK1	ETNK2, ETNK1
104465	109010	FBgn0000565	Eip71CD	CG7266	Negative	-	Positive	No	Negative		Ecdysone-induced protein 28/29kD [Acc:FBgn0000565]	http://flybase.org/reports/FBgn0000565.html	http://www.omim.org/entry/601250	MSRA	MSRA
103779	102650	FBgn0000566	Eip55E	CG5345	Negative	-	Positive	No	Negative	Y		http://flybase.org/reports/FBgn0000566.html	http://www.omim.org/entry/607657	CTH	CTH
105301	109288	FBgn0000567	Eip74EF	CG32180	Negative	-	Positive	No	Negative	N	Ecdysone-induced protein 74EF [Acc:FBgn0000567]	http://flybase.org/reports/FBgn0000567.html		ELF2	ELF4, ELF1, ELF2
102073	110612	FBgn0000633	CG17716	CG17716	Negative	-	Positive	No	Negative	Y		http://flybase.org/reports/FBgn0000633.html
110719	102286	FBgn0000667	Actn	CG4376	Negative	-	Positive	No	Negative	N	alpha actinin [Acc:FBgn0000667]	http://flybase.org/reports/FBgn0000667.html	http://www.omim.org/entry/102573	ACTN2	ACTN3, ACTN4, ACTN1, ACTN2
102101	110736	FBgn0000810	fs(1)K10	CG3218	Negative	-	Positive	No	Negative	N	female sterile (1) K10 [Acc:FBgn0000810]	http://flybase.org/reports/FBgn0000810.html
100011	102923	FBgn0001105	Gbeta13F	CG10545	Negative	-	Positive	No	Negative	Y	G protein beta-subunit 13F [Acc:FBgn0001105]	http://flybase.org/reports/FBgn0001105.html	https://www.omim.org/entry/139380	GNB1	GNB5, GNB3, GNB2, GNB4, GNB1
104196	104206	FBgn0001133	grau	CG33133	Negative	-	Positive	No	Negative	Y	grauzone [Acc:FBgn0001133]	http://flybase.org/reports/FBgn0001133.html
105070	113312	FBgn0001150	gt	CG7952	Negative	-	Positive	No	Negative	N	giant [Acc:FBgn0001150]	http://flybase.org/reports/FBgn0001150.html	http://www.omim.org/entry/188595	TEF	HLF, DBP, TEF
108851	100723	FBgn0001222	Hsf	CG5748	Negative	-	Positive	No	Negative		Heat shock factor [Acc:FBgn0001222]	http://flybase.org/reports/FBgn0001222.html	http://www.omim.org/entry/140580	HSF1	HSF4, HSF2, HSF1
100554	107379	FBgn0001248	Idh	CG7176	Negative	-	Positive	No	Negative	N	Isocitrate dehydrogenase [Acc:FBgn0001248]	http://flybase.org/reports/FBgn0001248.html	https://www.omim.org/entry/147700	IDH1	IDH2, IDH1
104613	111088	FBgn0001253	ImpE1	CG32356	Negative	-	Positive	No	Negative		Ecdysone-inducible gene E1 [Acc:FBgn0001253]	http://flybase.org/reports/FBgn0001253.html
105397	100891	FBgn0001301	kel	CG7210	Negative	-	Positive	No	Negative	Y	kelch [Acc:FBgn0001301]	http://flybase.org/reports/FBgn0001301.html	https://www.omim.org/entry/605775	KLHL3	KLHL2, KLHL3
107911	113026	FBgn0002440	l(3)mbn	CG12755	Negative	-	Positive	No	Negative	Y	lethal (3) malignant blood neoplasm [Acc:FBgn0002440]	http://flybase.org/reports/FBgn0002440.html
104563	100812	FBgn0002441	l(3)mbt	CG5954	Negative	-	Positive	No	Negative	Y	lethal (3) malignant brain tumor [Acc:FBgn0002441]	http://flybase.org/reports/FBgn0002441.html		L3MBTL3	L3MBTL1, L3MBTL4, L3MBTL3
100311	107959	FBgn0002522	lab	CG1264	Negative	-	Positive	No	Negative	Y	labial [Acc:FBgn0002522]	http://flybase.org/reports/FBgn0002522.html	https://www.omim.org/entry/142955	HOXA1	HOXD1, HOXB1, HOXA1
110181	102282	FBgn0002524	lace	CG4162	Negative	-	Positive	No	Negative			http://flybase.org/reports/FBgn0002524.html	http://www.omim.org/entry/605713	SPTLC2	SPTLC3, SPTLC2
101965	110344	FBgn0002632	E(spl)m6-BFM	CG8354	Negative	-	Positive	No	Negative	Y	Enhancer of split m6, Bearded family member [Acc:FBgn0002632]	http://flybase.org/reports/FBgn0002632.html	http://www.omim.org/entry/601275
108781	113125	FBgn0002865	Mst98Ca	CG11719	Negative	-	Positive	No	Negative	N	Male-specific RNA 98Ca [Acc:FBgn0002865]	http://flybase.org/reports/FBgn0002865.html
108366	105206	FBgn0002930	nec	CG1857	Negative	-	Positive	No	Negative	N	necrotic [Acc:FBgn0002930]	http://flybase.org/reports/FBgn0002930.html	https://www.omim.org/entry/605587	SERPINI2	SERPINI2
108239	107306	FBgn0002932	neur	CG11988	Negative	-	Positive	No	Negative	Y	neuralized [Acc:FBgn0002932]	http://flybase.org/reports/FBgn0002932.html	http://www.omim.org/entry/615893	NEURL1B	NEURL3, NEURL1, NEURL1B
110702	101634	FBgn0002938	ninaC	CG5125	Negative	-	Positive	No	Negative	N	neither inactivation nor afterpotential C [Acc:FBgn0002938]	http://flybase.org/reports/FBgn0002938.html	https://www.omim.org/entry/606808	MYO3A	MYO3B, MYO3A
105820	100407	FBgn0003076	Pgm	CG5165	Negative	-	Positive	No	Negative	N	phosphoglucose mutase [Acc:FBgn0003076]	http://flybase.org/reports/FBgn0003076.html	http://www.omim.org/entry/171900	PGM1	PGM5, PGM1
102352	111537	FBgn0003089	pip	CG9614	Negative	-	Positive	No	Negative	Y	pipe [Acc:FBgn0003089]	http://flybase.org/reports/FBgn0003089.html	https://www.omim.org/entry/610752	UST	UST
106103	109023	FBgn0003129	Poxm	CG9610	Negative	-	Positive	No	Negative	N	Pox meso [Acc:FBgn0003129]	http://flybase.org/reports/FBgn0003129.html	http://www.omim.org/entry/167416	PAX9	PAX1, PAX9
109430	108320	FBgn0003141	pr	CG16784	Negative	-	Positive	No	Negative	N	purple [Acc:FBgn0003141]	http://flybase.org/reports/FBgn0003141.html	http://www.omim.org/entry/612719	PTS	PTS
110574	107302	FBgn0003206	Ras64B	CG1167	Negative	-	Positive	No	Negative	N	Ras oncogene at 64B [Acc:FBgn0003206]	http://flybase.org/reports/FBgn0003206.html	http://www.omim.org/entry/600098	RRAS2	RAP2B, RAP2C, RAP2A, RAP1B, RAP1A, NRAS, KRAS, HRAS, RRAS, RRAS2
104576	108773	FBgn0003360	sesB	CG16944	Negative	-	Positive	No	Negative	Y	stress-sensitive B [Acc:FBgn0003360]	http://flybase.org/reports/FBgn0003360.html	http://www.omim.org/entry/103220	SLC25A4	SLC25A31, SLC25A6, SLC25A5, SLC25A4
101538	108994	FBgn0003371	sgg	CG2621	Negative	-	Positive	No	Negative	N	shaggy [Acc:FBgn0003371]	http://flybase.org/reports/FBgn0003371.html	http://omim.org/entry/605004	GSK3B	GSK3A, GSK3B
108593	101565	FBgn0003416	sl	CG4200	Negative	-	Positive	No	Negative		small wing [Acc:FBgn0003416]	http://flybase.org/reports/FBgn0003416.html	http://www.omim.org/entry/172420	PLCG1	PLCG2, PLCG1
102848	105453	FBgn0003459	stwl	CG3836	Negative	-	Positive	No	Negative	Y	stonewall [Acc:FBgn0003459]	http://flybase.org/reports/FBgn0003459.html
110770	107903	FBgn0003464	sol	CG1391	Negative	-	Positive	Yes	Negative	N	small optic lobes [Acc:FBgn0003464]	http://flybase.org/reports/FBgn0003464.html	http://www.omim.org/entry/603267	CAPN15	CAPN15
107335	109380	FBgn0003475	spir	CG10076	Negative	-	Positive	No	Negative	N	spire [Acc:FBgn0003475]	http://flybase.org/reports/FBgn0003475.html	http://www.omim.org/entry/609216	SPIRE1	SPIRE2, SPIRE1
103814	102798	FBgn0003557	Su(dx)	CG4244	Negative	-	Positive	No	Negative	N	Suppressor of deltex [Acc:FBgn0003557]	http://flybase.org/reports/FBgn0003557.html	http://www.omim.org/entry/602308	ITCH	SMURF2, SMURF1, NEDD4L, NEDD4, WWP2, WWP1, ITCH
100762	108498	FBgn0003651	svp	CG11502	Negative	-	Positive	No	Negative	Y	seven up [Acc:FBgn0003651]	http://flybase.org/reports/FBgn0003651.html	http://www.omim.org/entry/132890	NR2F2	NR2F6, NR2F1, NR2F2
100805	108747	FBgn0003742	tra2	CG10128	Negative	-	Positive	No	Negative	N	transformer 2 [Acc:FBgn0003742]	http://flybase.org/reports/FBgn0003742.html	https://www.omim.org/entry/602718	TRA2B	SAFB2, SLTM, SAFB, TRA2A, TRA2B
104102	104016	FBgn0003963	ush	CG2762	Negative	-	Positive	No	Negative		u-shaped [Acc:FBgn0003963]	http://flybase.org/reports/FBgn0003963.html	http://www.omim.org/entry/601950	ZFPM1	ZFPM2, ZFPM1
101812	109744	FBgn0003979	Vm26Aa	CG9048	Negative	-	Positive	No	Negative		Vitelline membrane 26Aa [Acc:FBgn0003979]	http://flybase.org/reports/FBgn0003979.html
100183	104312	FBgn0004181	Ebp	CG2668	Negative	-	Positive	No	Negative		Ejaculatory bulb protein [Acc:FBgn0004181]	http://flybase.org/reports/FBgn0004181.html
101336	107645	FBgn0004363	porin	CG6647	Negative	-	Positive	No	Negative	Y		http://flybase.org/reports/FBgn0004363.html	http://www.omim.org/entry/193245	VDAC2	VDAC1, VDAC3, VDAC2
104705	106416	FBgn0004372	aly	CG2075	Negative	-	Positive	No	Negative	N	always early [Acc:FBgn0004372]	http://flybase.org/reports/FBgn0004372.html	http://www.omim.org/entry/609375	LIN9	LIN9
108138	105891	FBgn0004374	neb	CG10718	Negative	-	Positive	No	Negative	Y	nebbish [Acc:FBgn0004374]	http://flybase.org/reports/FBgn0004374.html	http://www.omim.org/entry/611279	KIF14	KIF14
105383	100364	FBgn0004390	RasGAP1	CG6721	Negative	-	Positive	No	Negative	N	Ras GTPase activating protein 1 [Acc:FBgn0004390]	http://flybase.org/reports/FBgn0004390.html	http://www.omim.org/entry/605182	RASA3	RASA4B, RASA4, RASAL1, RASA2, RASA3
104804	109754	FBgn0004573	5-HT7	CG12073	Negative	-	Positive	No	Negative	Y	5-hydroxytryptamine (serotonin) receptor 7 [Acc:FBgn0004573]	http://flybase.org/reports/FBgn0004573.html	http://www.omim.org/entry/182137	HTR7	HTR1A, HTR1F, HTR1B, HTR1D, HTR7
106010	112375	FBgn0004588	Eig71Ea	CG16931	Negative	-	Positive	No	Negative	N	Ecdysone-induced gene 71Ea [Acc:FBgn0004588]	http://flybase.org/reports/FBgn0004588.html
102775	112407	FBgn0004593	Eig71Ef	CG7599	Negative	-	Positive	No	Negative	Y	Ecdysone-induced gene 71Ef [Acc:FBgn0004593]	http://flybase.org/reports/FBgn0004593.html
109716	104639	FBgn0004649	yl	CG1372	Negative	-	Positive	No	Negative	N	yolkless [Acc:FBgn0004649]	http://flybase.org/reports/FBgn0004649.html	https://www.omim.org/entry/600073	LRP2	LRP2
105201	113157	FBgn0004880	scrt	CG1130	Negative	-	Positive	No	Negative	Y	scratch [Acc:FBgn0004880]	http://flybase.org/reports/FBgn0004880.html	http://www.omim.org/entry/605858	SCRT1	SCRT2, SCRT1
110432	101665	FBgn0004885	tok	CG6863	Negative	-	Positive	No	Negative	Y	tolkin [Acc:FBgn0004885]	http://flybase.org/reports/FBgn0004885.html	http://www.omim.org/entry/606742	TLL1	TLL2, BMP1, TLL1
104167	100308	FBgn0004889	tws	CG6235	Negative	-	Positive	No	Negative	N	twins [Acc:FBgn0004889]	http://flybase.org/reports/FBgn0004889.html	http://www.omim.org/entry/613992	PPP2R2D	PPP2R2C, PPP2R2A, PPP2R2B, PPP2R2D
107292	107560	FBgn0005659	Ets98B	CG5583	Negative	-	Positive	No	Negative	Y	Ets at 98B [Acc:FBgn0005659]	http://flybase.org/reports/FBgn0005659.html	http://www.omim.org/entry/608144	SPDEF	SPIC, SPIB, SPI1, SPDEF
106040	108428	FBgn0005677	dac	CG4952	Negative	-	Positive	No	Negative	N	dachshund [Acc:FBgn0005677]	http://flybase.org/reports/FBgn0005677.html	http://www.omim.org/entry/603803	DACH1	DACH2, DACH1
101187	107071	FBgn0005775	Con	CG7503	Negative	-	Positive	No	Negative		Connectin [Acc:FBgn0005775]	http://flybase.org/reports/FBgn0005775.html
106287	105321	FBgn0010039	GstD3	CG4381	Negative	-	Positive	No	Negative	Y	Glutathione S transferase D3 [Acc:FBgn0010039]	http://flybase.org/reports/FBgn0010039.html	https://www.omim.org/entry/600436
102234	111205	FBgn0010041	GstD5	CG12242	Negative	-	Positive	No	Negative	Y	Glutathione S transferase D5 [Acc:FBgn0010041]	http://flybase.org/reports/FBgn0010041.html	https://www.omim.org/entry/600436
109921	110694	FBgn0010097	gammaTub37C	CG17566	Negative	-	Positive	No	Negative	N	gamma-Tubulin at 37C [Acc:FBgn0010097]	http://flybase.org/reports/FBgn0010097.html	http://www.omim.org/entry/191135	TUBG1	TUBG2, TUBG1
104322	107459	FBgn0010113	hdc	CG15532	Negative	-	Positive	No	Negative		Histidine decarboxylase [Acc:FBgn0010113]	http://flybase.org/reports/FBgn0010113.html	http://www.omim.org/entry/607977	HECA	HECA
107450	107469	FBgn0010238	Lac	CG12369	Negative	-	Positive	No	Negative	N	Lachesin [Acc:FBgn0010238]	http://flybase.org/reports/FBgn0010238.html	https://www.omim.org/entry/613173	NEGR1	IGLON5, OPCML, LSAMP, NTM, NEGR1
109556	115674	FBgn0010294	ng2	CG14266	Negative	-	Positive	No	Negative		new glue 2 [Acc:FBgn0010294]	http://flybase.org/reports/FBgn0010294.html
100959	106353	FBgn0010309	pigeon	CG10739	Negative	-	Positive	No	Negative	N		http://flybase.org/reports/FBgn0010309.html	http://www.omim.org/entry/613552	GSAP	GSAP
108790	100207	FBgn0010406	RNaseX25	CG8194	Negative	-	Positive	No	Negative	Y	Ribonuclease X25 [Acc:FBgn0010406]	http://flybase.org/reports/FBgn0010406.html	http://www.omim.org/entry/612944	RNASET2	RNASET2
104671	102348	FBgn0010453	Wnt4	CG4698	Negative	-	Positive	No	Negative	Y	Wnt oncogene analog 4 [Acc:FBgn0010453]	http://flybase.org/reports/FBgn0010453.html	http://www.omim.org/entry/602864	WNT9B	WNT1, WNT2, WNT2B, WNT16, WNT11, WNT9A, WNT9B
103955	103120	FBgn0011653	mas	CG15002	Negative	-	Positive	No	Negative	N	masquerade [Acc:FBgn0011653]	http://flybase.org/reports/FBgn0011653.html
108599	101602	FBgn0011715	Snr1	CG1064	Negative	-	Positive	No	Negative	N	Snf5-related 1 [Acc:FBgn0011715]	http://flybase.org/reports/FBgn0011715.html	http://www.omim.org/entry/601607	SMARCB1	SMARCB1
108271	105854	FBgn0011822	Pgcl	CG13374	Negative	-	Positive	No	Negative	Y	Pepsinogen C-like [Acc:FBgn0011822]	http://flybase.org/reports/FBgn0011822.html	http://www.omim.org/entry/169740	REN	PGA3, PGA4, PGA5, PGC, REN, CTSE, CTSD, NAPSA
106433	112776	FBgn0013263	Trl	CG33261	Negative	-	Positive	No	Negative		Trithorax-like [Acc:FBgn0013263]	http://flybase.org/reports/FBgn0013263.html
108378	108035	FBgn0013305	Nmda1	CG3798	Negative	-	Positive	No	Negative	N	N-methyl-D-aspartate receptor-associated protein [Acc:FBgn0013305]	http://flybase.org/reports/FBgn0013305.html	http://www.omim.org/entry/138251	GRINA	TMBIM4, TMBIM1, FAIM2, GRINA
100726	108126	FBgn0013750	Arf51F	CG8156	Negative	-	Positive	No	Negative	N	ADP ribosylation factor at 51F [Acc:FBgn0013750]	http://flybase.org/reports/FBgn0013750.html	http://www.omim.org/entry/600464	ARF6	ARF6
104793	109311	FBgn0013759	CASK	CG6703	Negative	-	Positive	No	Negative	N		http://flybase.org/reports/FBgn0013759.html	http://www.omim.org/entry/300172	CASK	MPP1, CASK
104793	109311	FBgn0013759	CASK	CG6703	Negative	-	Positive	No	Negative	N		http://flybase.org/reports/FBgn0013759.html	http://www.omim.org/entry/300172	CASK	MPP1, CASK
101226	103952	FBgn0013811	Dhc62B	CG15804	Negative	-	Positive	No	Negative	Y	Dynein heavy chain at 62B [Acc:FBgn0013811]	http://flybase.org/reports/FBgn0013811.html	http://www.omim.org/entry/603340	DNAH12	DNHD1, DNAH12
108658	100610	FBgn0013812	Dhc93AB	CG3723	Negative	-	Positive	No	Negative	Y	Dynein heavy chain at 93AB [Acc:FBgn0013812]	http://flybase.org/reports/FBgn0013812.html	http://www.omim.org/entry/603330	DNAH9	DNAH11, DNAH17, DNAH9
101834	109863	FBgn0013983	imd	CG5576	Negative	-	Positive	No	Negative		immune deficiency [Acc:FBgn0013983]	http://flybase.org/reports/FBgn0013983.html
110317	100594	FBgn0013987	MAPk-Ak2	CG3086	Negative	-	Positive	No	Negative	N	MAP kinase activated protein-kinase-2 [Acc:FBgn0013987]	http://flybase.org/reports/FBgn0013987.html	http://www.omim.org/entry/602130	MAPKAPK3	MAPKAPK2, MAPKAPK3
108243	107353	FBgn0014032	Sptr	CG12117	Negative	-	Positive	No	Negative	Y	Sepiapterin reductase [Acc:FBgn0014032]	http://flybase.org/reports/FBgn0014032.html	http://www.omim.org/entry/182125	SPR	SPR
103933	102846	FBgn0014092	CG4278	CG4278	Negative	-	Positive	No	Negative	Y		http://flybase.org/reports/FBgn0014092.html	http://www.omim.org/entry/605778	NIF3L1	NIF3L1
110403	101392	FBgn0014395	tilB	CG14620	Negative	-	Positive	No	Negative	Y	touch insensitive larva B [Acc:FBgn0014395]	http://flybase.org/reports/FBgn0014395.html	http://www.omim.org/entry/614930	LRRC6	LRRC6
110794	101086	FBgn0014417	CG13397	CG13397	Negative	-	Positive	No	Negative			http://flybase.org/reports/FBgn0014417.html	http://www.omim.org/entry/609701	NAGLU	NAGLU
104500	109393	FBgn0014455	Ahcy	CG11654	Negative	-	Positive	No	Negative	N	Adenosylhomocysteinase [Acc:FBgn0014455]	http://flybase.org/reports/FBgn0014455.html	http://www.omim.org/entry/180960	AHCY	AHCY
101166	105604	FBgn0015399	kek1	CG12283	Negative	-	Positive	No	Negative		kekkon-1 [Acc:FBgn0015399]	http://flybase.org/reports/FBgn0015399.html	http://www.omim.org/entry/602059	ISLR2	LRRC4C, LRRC4, LRRC4B, ISLR2, ISLR
101806	109718	FBgn0015519	nAChRalpha3	CG2302	Negative	-	Positive	No	Negative	N	nicotinic Acetylcholine Receptor alpha3 [Acc:FBgn0015519]	http://flybase.org/reports/FBgn0015519.html	http://www.omim.org/entry/606888	CHRNA6	CHRND, CHRNB1, CHRNG, CHRNE, CHRNB2, CHRNA1, CHRNB3, CHRNB4, CHRNA5, CHRNA2, CHRNA4, CHRNA3, CHRNA6
100545	106955	FBgn0015663	Dot	CG2788	Negative	-	Positive	No	Negative	Y	Dorothy [Acc:FBgn0015663]	http://flybase.org/reports/FBgn0015663.html	http://www.omim.org/entry/603064	UGT1A1	UGT2A2, UGT1A4, UGT1A10, UGT1A7, UGT1A5, UGT1A9, UGT1A6, UGT1A8, UGT3A1, UGT3A2, UGT1A1, UGT8, UGT2B4, UGT2B15, UGT2B28, UGT1A3, UGT2B17, UGT2B11, UGT2A3, UGT2B7, UGT2B10
108034	105944	FBgn0015770	MstProx	CG1149	Negative	-	Positive	No	Negative	Y		http://flybase.org/reports/FBgn0015770.html	http://www.omim.org/entry/602226	TLR2	TLR2, TLR10, TLR4, TLR6, TLR1
109507	108111	FBgn0015772	Nak	CG10637	Negative	-	Positive	No	Negative	Y	Numb-associated kinase [Acc:FBgn0015772]	http://flybase.org/reports/FBgn0015772.html	http://www.omim.org/entry/616405	AAK1	BMP2K, AAK1
109507	108111	FBgn0015772	Nak	CG10637	Negative	-	Positive	No	Negative	Y	Numb-associated kinase [Acc:FBgn0015772]	http://flybase.org/reports/FBgn0015772.html	http://www.omim.org/entry/616405	AAK1	BMP2K, AAK1
100840	103672	FBgn0015774	NetB	CG10521	Negative	-	Positive	Yes	Negative	Y	Netrin-B [Acc:FBgn0015774]	http://flybase.org/reports/FBgn0015774.html	http://www.omim.org/entry/601614	NTN1	NTNG2, NTNG1, NTN5, NTN3, NTN1
100774	108556	FBgn0015797	Rab6	CG6601	Negative	-	Positive	No	Negative	N		http://flybase.org/reports/FBgn0015797.html	http://www.omim.org/entry/179513	RAB6A	RAB6D, RAB41, RAB6C, RAB6B, RAB6A
103141	107698	FBgn0015834	eIF3i	CG8882	Negative	-	Positive	No	Negative		eukaryotic translation initiation factor 3 subunit i [Acc:FBgn0015834]	http://flybase.org/reports/FBgn0015834.html	http://www.omim.org/entry/603911	EIF3I	EIF3I
100819	108814	FBgn0015838	Vang	CG8075	Negative	-	Positive	No	Negative	N	Van Gogh [Acc:FBgn0015838]	http://flybase.org/reports/FBgn0015838.html	http://www.omim.org/entry/600533	VANGL1	VANGL2, VANGL1
108850	100685	FBgn0015925	csul	CG3730	Negative	-	Positive	No	Negative		capsuleen [Acc:FBgn0015925]	http://flybase.org/reports/FBgn0015925.html	http://www.omim.org/entry/604045	PRMT5	PRMT5
106812	111668	FBgn0016075	vkg	CG16858	Negative	-	Positive	No	Negative	Y	viking [Acc:FBgn0016075]	http://flybase.org/reports/FBgn0016075.html	http://www.omim.org/entry/120120	COL4A1	COL4A5, COL4A6, COL4A1
100382	106119	FBgn0016080	xmas-1	CG32561	Negative	-	Positive	No	Negative	N		http://flybase.org/reports/FBgn0016080.html
108380	108214	FBgn0016697	Prosalpha5	CG10938	Negative	-	Positive	No	Negative	Y	Proteasome alpha5 subunit [Acc:FBgn0016697]	http://flybase.org/reports/FBgn0016697.html	https://www.omim.org/entry/176844	PSMA5	PSMA5
110797	102085	FBgn0017567	ND-23	CG3944	Negative	-	Positive	No	Negative	Y	NADH dehydrogenase (ubiquinone) 23 kDa subunit [Acc:FBgn0017567]	http://flybase.org/reports/FBgn0017567.html	https://www.omim.org/entry/602141	NDUFS8	NDUFS8
100298	107619	FBgn0020257	Ppa	CG9952	Negative	-	Positive	No	Negative	Y	Partner of paired [Acc:FBgn0020257]	http://flybase.org/reports/FBgn0020257.html	https://www.omim.org/entry/609081	FBXL14	FBXL14
102307	109528	FBgn0020277	lush	CG8807	Negative	-	Positive	No	Negative	Y		http://flybase.org/reports/FBgn0020277.html
104290	107051	FBgn0020300	geko	CG13695	Negative	-	Positive	No	Negative	Y		http://flybase.org/reports/FBgn0020300.html
100714	108071	FBgn0020510	Abi	CG9749	Negative	-	Positive	No	Negative	Y	Abelson interacting protein [Acc:FBgn0020510]	http://flybase.org/reports/FBgn0020510.html	http://www.omim.org/entry/606442	ABI2	ABI3, ABI1, ABI2
103526	112715	FBgn0020637	Lcp65Ag2	CG10534	Negative	-	Positive	No	Negative	Y		http://flybase.org/reports/FBgn0020637.html
110802	108042	FBgn0021765	scu	CG7113	Negative	-	Positive	No	Negative	Y	scully [Acc:FBgn0021765]	http://flybase.org/reports/FBgn0021765.html	http://www.omim.org/entry/300256	HSD17B10	HSD17B10
106934	102805	FBgn0022029	l(2)k01209	CG4798	Negative	-	Positive	No	Negative	N	lethal (2) k01209 [Acc:FBgn0022029]	http://flybase.org/reports/FBgn0022029.html	https://www.omim.org/entry/610866	UCKL1	UPRT, UCK1, UCK2, UCKL1
106479	103815	FBgn0022355	Tsf1	CG6186	Negative	-	Positive	No	Negative		Transferrin 1 [Acc:FBgn0022355]	http://flybase.org/reports/FBgn0022355	https://www.omim.org/entry/155750	MELTF	LTF, TF, MELTF
105249	102596	FBgn0022768	Pp2C1	CG2984	Negative	-	Positive	No	Negative	Y	Protein phosphatase 2C [Acc:FBgn0022768]	http://flybase.org/reports/FBgn0022768.html	http://www.omim.org/entry/605100	PPM1D	PPM1D
106989	100814	FBgn0022786	Hira	CG12153	Negative	-	Positive	No	Negative	N		http://flybase.org/reports/FBgn0022786.html	http://www.omim.org/entry/600237	HIRA	HIRA
100180	105182	FBgn0022935	D19A	CG10269	Negative	-	Positive	No	Negative	Y		http://flybase.org/reports/FBgn0022935.html
110661	100557	FBgn0023129	aay	CG3705	Negative	-	Positive	No	Negative		astray [Acc:FBgn0023129]	http://flybase.org/reports/FBgn0023129.html	http://www.omim.org/entry/172480	PSPH	PSPH
101991	108462	FBgn0023215	Mnt	CG13316	Negative	-	Positive	No	Negative			http://flybase.org/reports/FBgn0023215.html	http://www.omim.org/entry/603039	MNT	MNT
102687	112176	FBgn0023415	Acp32CD	CG4605	Negative	-	Positive	No	Negative	N	Accessory gland protein 32CD [Acc:FBgn0023415]	http://flybase.org/reports/FBgn0023415.html
110594	108538	FBgn0023489	Pph13	CG2819	Negative	-	Positive	No	Negative	N	PvuII-PstI homology 13 [Acc:FBgn0023489]	http://flybase.org/reports/FBgn0023489.html	http://www.omim.org/entry/300154	ARX	ALX1, ARX
108263	102182	FBgn0023521	CG3587	CG3587	Negative	-	Positive	No	Negative	N		http://flybase.org/reports/FBgn0023521.html		KTI12	KTI12
107206	100651	FBgn0023527	CG3071	CG3071	Negative	-	Positive	No	Negative			http://flybase.org/reports/FBgn0023527.html	http://www.omim.org/entry/616194	UTP15	UTP15
105583	105828	FBgn0024958	Irp-1A	CG4900	Negative	-	Positive	No	Negative	N	Iron regulatory protein 1A [Acc:FBgn0024958]	http://flybase.org/reports/FBgn0024958.html	https://www.omim.org/entry/100880	ACO1	IREB2, ACO1
106361	110097	FBgn0024993	CG2662	CG2662	Negative	-	Positive	No	Negative	Y		http://flybase.org/reports/FBgn0024993.html		SAMD13	SAMD13
107987	108718	FBgn0025549	unc-119	CG1659	Negative	-	Positive	No	Negative	Y		http://flybase.org/reports/FBgn0025549.html	https://www.omim.org/entry/604011	UNC119	UNC119B, UNC119
110806	100748	FBgn0025592	Gk1	CG18374	Negative	-	Positive	No	Negative	N	Glycerol kinase 1 [Acc:FBgn0025592]	http://flybase.org/reports/FBgn0025592.html	http://www.omim.org/entry/300474	GK	GK5, GK3P, GK, GK2
102507	111839	FBgn0025613	CG3081	CG3081	Negative	-	Positive	No	Negative	Y		http://flybase.org/reports/FBgn0025613.html
100997	106524	FBgn0025620	CG13360	CG13360	Negative	-	Positive	No	Negative	N		http://flybase.org/reports/FBgn0025620.html
103739	102292	FBgn0025625	Sik2	CG4290	Negative	-	Positive	No	Negative	N	Salt-inducible kinase 2 [Acc:FBgn0025625]	http://flybase.org/reports/FBgn0025625.html	https://www.omim.org/entry/608973	SIK2	SIK1, SIK1B, SIK2
108092	101059	FBgn0025633	CG13366	CG13366	Negative	-	Positive	No	Negative	Y		http://flybase.org/reports/FBgn0025633.html	http://www.omim.org/entry/614140	SPECC1L	SPECC1L-ADORA2A, SMTN, SPECC1, SPECC1L
109875	112747	FBgn0025643	CG3588	CG3588	Negative	-	Positive	No	Negative	Y		http://flybase.org/reports/FBgn0025643.html
110761	108739	FBgn0025679	Klf15	CG2932	Negative	-	Positive	No	Negative	Y	Kruppel-like factor 15 [Acc:FBgn0025679]	http://flybase.org/reports/FBgn0025679.html	http://www.omim.org/entry/606465	KLF15	KLF15
105976	101635	FBgn0026056	Rlip	CG11622	Negative	-	Positive	No	Negative	Y	Ral interacting protein [Acc:FBgn0026056]	http://flybase.org/reports/FBgn0026056.html	http://www.omim.org/entry/605801	RALBP1	RALBP1
110811	102605	FBgn0026317	Tsc1	CG6147	Negative	-	Positive	No	Negative			http://flybase.org/reports/FBgn0026317.html	http://www.omim.org/entry/605284	TSC1	TSC1
103416	100641	FBgn0026370	SRPK	CG8174	Negative	-	Positive	No	Negative		SR Protein Kinase [Acc:FBgn0026370]	http://flybase.org/reports/FBgn0026370.html	http://www.omim.org/entry/601939	SRPK1	SRPK3, SRPK2, SRPK1
107168	103784	FBgn0026391	Or33b	CG16961	Negative	-	Positive	No	Negative	Y	Odorant receptor 33b [Acc:FBgn0026391]	http://flybase.org/reports/FBgn0026391.html
104371	107989	FBgn0026438	Eaat2	CG3159	Negative	-	Positive	No	Negative	N	Excitatory amino acid transporter 2 [Acc:FBgn0026438]	http://flybase.org/reports/FBgn0026438.html	http://www.omim.org/entry/600300	SLC1A2	SLC1A4, SLC1A5, SLC1A3, SLC1A6, SLC1A7, SLC1A1, SLC1A2
109401	100187	FBgn0026439	Eaat1	CG3747	Negative	-	Positive	No	Negative		Excitatory amino acid transporter 1 [Acc:FBgn0026439]	http://flybase.org/reports/FBgn0026439.html	http://www.omim.org/entry/600111	SLC1A3	SLC1A2, SLC1A5, SLC1A4, SLC1A7, SLC1A6, SLC1A1, SLC1A3
104095	103948	FBgn0026573	ADD1	CG8290	Negative	-	Positive	No	Negative	Y	ADD domain-containing protein 1 [Acc:FBgn0026573]	http://flybase.org/reports/FBgn0026573.html	http://www.omim.org/entry/602900	ATRX	ATRX
110205	102521	FBgn0026787	Nhe1	CG12178	Negative	-	Positive	No	Negative		Na[+]/H[+] hydrogen exchanger 1 [Acc:FBgn0026787]	http://flybase.org/reports/FBgn0026787.html	http://www.omim.org/entry/612730	SLC9A8	SLC9A8
107447	107392	FBgn0027052	STUB1	CG5203	Negative	-	Positive	No	Negative	Y	STIP1 homology and U-box containing protein 1 [Acc:FBgn0027052]	http://flybase.org/reports/FBgn0027052.html	http://www.omim.org/entry/607207	STUB1	STUB1
110057	105869	FBgn0027070	CG17322	CG17322	Negative	-	Positive	No	Negative	Y		http://flybase.org/reports/FBgn0027070.html	http://www.omim.org/entry/606428	UGT2B10	UGT2A2, UGT1A4, UGT1A7, UGT1A5, UGT1A9, UGT1A6, UGT3A1, UGT3A2, UGT1A1, UGT2B4, UGT2B15, UGT2B28, UGT1A3, UGT2B17, UGT2B11, UGT2A3, UGT2B7, UGT1A10, UGT1A8, UGT8, UGT2B10
102339	111387	FBgn0027342	fz4	CG4626	Negative	-	Positive	No	Negative	N	frizzled 4 [Acc:FBgn0027342]	http://flybase.org/reports/FBgn0027342.html	http://www.omim.org/entry/604579	FZD4	FZD4
110618	107689	FBgn0027378	MRG15	CG6363	Negative	-	Positive	No	Negative		MORF-related gene 15 [Acc:FBgn0027378]	http://flybase.org/reports/FBgn0027378.html	http://www.omim.org/entry/607303	MORF4L1	MORF4L2, MORF4L1
107588	100007	FBgn0027496	epsilonCOP	CG9543	Negative	-	Positive	No	Negative		Coat Protein (coatomer) epsilon [Acc:FBgn0027496]	http://flybase.org/reports/FBgn0027496.html	http://www.omim.org/entry/606942	COPE	COPE
101882	110116	FBgn0027500	spd-2	CG17286	Negative	-	Positive	No	Negative	N	spindle defective 2 [Acc:FBgn0027500]	http://flybase.org/reports/FBgn0027500.html	http://www.omim.org/entry/616426	CEP192	CEP192
108167	103644	FBgn0027544	CG2217	CG2217	Negative	-	Positive	No	Negative	Y		http://flybase.org/reports/FBgn0027544.html
104988	107808	FBgn0027561	CG18659	CG18659	Negative	-	Positive	No	Negative	Y		http://flybase.org/reports/FBgn0027561.html	http://www.omim.org/entry/613292	DENND1B	DENND1C, DENND1A, DENND1B
102584	112073	FBgn0027570	Nep2	CG9761	Negative	-	Positive	No	Negative	N	Neprilysin 2 [Acc:FBgn0027570]	http://flybase.org/reports/FBgn0027570.html	http://www.omim.org/entry/600423	PHEX	KEL, ECE2, ECEL1, ECE1, PHEX, MMEL1, MME
103761	102508	FBgn0027572	CG5009	CG5009	Negative	-	Positive	No	Negative	N		http://flybase.org/reports/FBgn0027572.html	http://www.omim.org/entry/609751	ACOX1	ACOX2, ACOX1
104379	108067	FBgn0027602	CG8611	CG8611	Negative	-	Positive	No	Negative	N		http://flybase.org/reports/FBgn0027602.html	http://www.omim.org/entry/616533	DDX31	DDX31
109723	105922	FBgn0027795	CG14785	CG14785	Negative	-	Positive	No	Negative			http://flybase.org/reports/FBgn0027795.html	http://www.omim.org/entry/611201
105962	101291	FBgn0027864	Ogg1	CG1795	Negative	-	Positive	No	Negative	N	8-oxoguanine DNA glycosylase [Acc:FBgn0027864]	http://flybase.org/reports/FBgn0027864.html	http://www.omim.org/entry/601982	OGG1	OGG1
104308	107262	FBgn0027930	MP1	CG1102	Negative	-	Positive	No	Negative	Y	Melanization Protease 1 [Acc:FBgn0027930]	http://flybase.org/reports/FBgn0027930.html
109438	108531	FBgn0028292	ric8a	CG15797	Negative	-	Positive	No	Negative	N		http://flybase.org/reports/FBgn0028292.html	http://www.omim.org/entry/609146	RIC8A	RIC8B, RIC8A
104427	108723	FBgn0028341	Ptpmeg2	CG32697	Negative	-	Positive	No	Negative	Y	Protein tyrosine phosphatase Meg2 [Acc:FBgn0028341]	http://flybase.org/reports/FBgn0028341.html	http://www.omim.org/entry/600768	PTPN9	PTPN9
107771	112818	FBgn0028374	Hug	CG6371	Negative	-	Positive	No	Negative	N	Hugin [Acc:FBgn0028374]	http://flybase.org/reports/FBgn0028374.html
101870	110050	FBgn0028412	Mst33A	CG6541	Negative	-	Positive	No	Negative	N		http://flybase.org/reports/FBgn0028412.html
109244	116204	FBgn0028415	Met75Cb	CG18064	Negative	-	Positive	No	Negative	N		http://flybase.org/reports/FBgn0028415.html
103548	100933	FBgn0028421	Kap3	CG11759	Negative	-	Positive	No	Negative		Kinesin associated protein 3 [Acc:FBgn0028421]	http://flybase.org/reports/FBgn0028421.html	http://www.omim.org/entry/601836	KIFAP3	KIFAP3
109317	104398	FBgn0028424	JhI-26	CG3767	Negative	-	Positive	No	Negative		Juvenile hormone-inducible protein 26 [Acc:FBgn0028424]	http://flybase.org/reports/FBgn0028424.html
110786	102190	FBgn0028497	CG3530	CG3530	Negative	-	Positive	No	Negative			http://flybase.org/reports/FBgn0028497.html	http://www.omim.org/entry/603562	MTMR8	MTMR9, MTMR1, MTMR2, MTMR6, MTMR7, MTMR8
109919	109899	FBgn0028514	CG4793	CG4793	Negative	-	Positive	No	Negative	Y		http://flybase.org/reports/FBgn0028514.html
101195	107104	FBgn0028534	CG7916	CG7916	Negative	-	Positive	No	Negative	Y		http://flybase.org/reports/FBgn0028534.html
104759	105069	FBgn0028567	robl62A	CG1014	Negative	-	Positive	No	Negative	Y		http://flybase.org/reports/FBgn0028567.html	http://www.omim.org/entry/607168	DYNLRB2	DYNLRB1, DYNLRB2
104913	112056	FBgn0028572	qtc	CG14039	Negative	-	Positive	No	Negative	Y	quick-to-court [Acc:FBgn0028572]	http://flybase.org/reports/FBgn0028572.html
106402	111673	FBgn0028648	mRpL50	CG8612	Negative	-	Positive	No	Negative	Y	mitochondrial ribosomal protein L50 [Acc:FBgn0028648]	http://flybase.org/reports/FBgn0028648.html	http://www.omim.org/entry/611854	MRPL50	MRPL50
109763	103346	FBgn0028670	Vha100-2	CG18617	Negative	-	Positive	No	Negative		Vacuolar H[+] ATPase 100kD subunit 2 [Acc:FBgn0028670]	http://flybase.org/reports/FBgn0028670.html	http://www.omim.org/entry/605239	ATP6V0A4	ATP6V0A2, TCIRG1, ATP6V0A1, ATP6V0A4
100742	108326	FBgn0028703	Nhe3	CG11328	Negative	-	Positive	No	Negative	Y	Na[+]/H[+] hydrogen exchanger 3 [Acc:FBgn0028703]	http://flybase.org/reports/FBgn0028703.html	http://www.omim.org/entry/608396	SLC9A6	SLC9A8, SLC9A7, SLC9A9, SLC9A6
107845	103327	FBgn0028887	CG3491	CG3491	Negative	-	Positive	No	Negative	Y		http://flybase.org/reports/FBgn0028887.html	http://www.omim.org/entry/615729	SBNO2	SBNO1, SBNO2
101714	105539	FBgn0028902	Tektin-A	CG4767	Negative	-	Positive	No	Negative	N	Tektin A [Acc:FBgn0028902]	http://flybase.org/reports/FBgn0028902.html		TEKT4	TEKT1, TEKT5, TEKT3, TEKT4
110221	102761	FBgn0028931	CG16863	CG16863	Negative	-	Positive	No	Negative			http://flybase.org/reports/FBgn0028931.html	http://www.omim.org/entry/300178	ZBED1	ZBED1
109728	106542	FBgn0028949	CG15254	CG15254	Negative	-	Positive	No	Negative	Y		http://flybase.org/reports/FBgn0028949.html	http://www.omim.org/entry/112264	MEP1B	BMP1, ASTL, MEP1B, MEP1A
107578	113296	FBgn0028965	A16	CG9933	Negative	-	Positive	No	Negative	N		http://flybase.org/reports/FBgn0028965.html
108101	102556	FBgn0029092	ced-6	CG11804	Negative	-	Positive	No	Negative	N		http://flybase.org/reports/FBgn0029092.html	http://www.omim.org/entry/608165	GULP1	GULP1
101190	107079	FBgn0029172	Fad2	CG7923	Negative	-	Positive	No	Negative	N		http://flybase.org/reports/FBgn0029172.html	http://www.omim.org/entry/604031	SCD	SCD, SCD5
102890	113204	FBgn0029535	CG14635	CG14635	Negative	-	Positive	No	Negative	Y		http://flybase.org/reports/FBgn0029535.html
109832	110051	FBgn0029608	CG3091	CG3091	Negative	-	Positive	No	Negative	N		http://flybase.org/reports/FBgn0029608.html		TTPAL	TTPAL, TTPA
109916	109726	FBgn0029681	CG15239	CG15239	Negative	-	Positive	No	Negative	N		http://flybase.org/reports/FBgn0029681.html
107732	104933	FBgn0029696	CG15571	CG15571	Negative	-	Positive	No	Negative	N		http://flybase.org/reports/FBgn0029696.html
109686	103218	FBgn0029702	CG15572	CG15572	Negative	-	Positive	No	Negative	Y		http://flybase.org/reports/FBgn0029702.html
109683	103176	FBgn0029703	CG12692	CG12692	Negative	-	Positive	No	Negative	N		http://flybase.org/reports/FBgn0029703.html
110639	108211	FBgn0029783	Sirt4	CG3187	Negative	-	Positive	No	Negative	Y	Sirtuin 4 [Acc:FBgn0029783]	http://flybase.org/reports/FBgn0029783.html	http://www.omim.org/entry/604482	SIRT4	SIRT4
103551	100978	FBgn0029830	Grip	CG14447	Negative	-	Positive	No	Negative		Glutamate receptor binding protein [Acc:FBgn0029830]	http://flybase.org/reports/FBgn0029830.html	http://www.omim.org/entry/604597	GRIP1	GRIP2, GRIP1
106976	100442	FBgn0029848	Btnd	CG3599	Negative	-	Positive	No	Negative	N	Biotinidase [Acc:FBgn0029848]	http://flybase.org/reports/FBgn0029848.html	http://www.omim.org/entry/603571	BTD	VNN3, VNN1, VNN2, BTD
102685	112163	FBgn0029854	CG3566	CG3566	Negative	-	Positive	No	Negative	Y		http://flybase.org/reports/FBgn0029854.html	https://www.omim.org/entry/611964	CYB5A	CYB5B, CYB5A
104239	106258	FBgn0029977	hdm	CG15329	Negative	-	Positive	No	Negative	N	hold'em [Acc:FBgn0029977]	http://flybase.org/reports/FBgn0029977.html		MEIOB	MEIOB
101675	105404	FBgn0030003	CG2116	CG2116	Negative	-	Positive	No	Negative	N		http://flybase.org/reports/FBgn0030003.html
108726	107349	FBgn0030004	CG10958	CG10958	Negative	-	Positive	No	Negative			http://flybase.org/reports/FBgn0030004.html	http://www.omim.org/entry/615288	DRC1	DRC1
102191	111048	FBgn0030010	CG10959	CG10959	Negative	-	Positive	No	Negative			http://flybase.org/reports/FBgn0030010.html	https://www.omim.org/entry/612218	ZBTB38	ZBTB38
107936	112114	FBgn0030051	spirit	CG2056	Negative	-	Positive	No	Negative	Y	Serine Protease Immune Response Integrator [Acc:FBgn0030051]	http://flybase.org/reports/FBgn0030051.html
110364	101004	FBgn0030067	Rbm13	CG10648	Negative	-	Positive	No	Negative		RNA-binding motif protein 13 [Acc:FBgn0030067]	http://flybase.org/reports/FBgn0030067.html		MAK16	MAK16
101197	107109	FBgn0030074	CG12662	CG12662	Negative	-	Positive	No	Negative	N		http://flybase.org/reports/FBgn0030074.html
100743	108336	FBgn0030099	CG12056	CG12056	Negative	-	Positive	No	Negative	Y		http://flybase.org/reports/FBgn0030099.html		CYB5D2	CYB5D2
107409	112204	FBgn0030107	CG15370	CG15370	Negative	-	Positive	No	Negative			http://flybase.org/reports/FBgn0030107.html
101370	108714	FBgn0030183	CG15309	CG15309	Negative	-	Positive	No	Negative			http://flybase.org/reports/FBgn0030183.html	http://www.omim.org/entry/608082	YPEL2	YPEL5, YPEL4, YPEL3, YPEL1, YPEL2
109337	107492	FBgn0030230	Rph	CG11556	Negative	-	Positive	No	Negative		Rabphilin [Acc:FBgn0030230]	http://flybase.org/reports/FBgn0030230.html	http://www.omim.org/entry/612159	RPH3A	RPH3AL, DOC2A, DOC2B, RPH3A
104929	112279	FBgn0030234	CG15211	CG15211	Negative	-	Positive	No	Negative	Y		http://flybase.org/reports/FBgn0030234.html	http://www.omim.org/entry/607887	CMTM4	CMTM2, CMTM1, MARVELD1, MAL, CMTM8, CKLF, CMTM5, CMTM3, CMTM7, PLP2, PLLP, CMTM6, CMTM4
108489	111803	FBgn0030270	CG15199	CG15199	Negative	-	Positive	No	Negative	N		http://flybase.org/reports/FBgn0030270.html
105932	107284	FBgn0030274	Lint-1	CG1908	Negative	-	Positive	No	Negative		l(3)mbt interacting protein 1 [Acc:FBgn0030274]	http://flybase.org/reports/FBgn0030274.html
110296	109792	FBgn0030277	CG1394	CG1394	Negative	-	Positive	No	Negative	Y		http://flybase.org/reports/FBgn0030277.html
110307	111514	FBgn0030307	CG33235	CG33235	Negative	-	Positive	No	Negative			http://flybase.org/reports/FBgn0030307.html
101491	108854	FBgn0030311	CG11699	CG11699	Negative	-	Positive	No	Negative	Y		http://flybase.org/reports/FBgn0030311.html		TMEM242	TMEM242
100200	104778	FBgn0030318	rho-4	CG1697	Negative	-	Positive	No	Negative	N	rhomboid-4 [Acc:FBgn0030318]	http://flybase.org/reports/FBgn0030318.html	http://www.omim.org/entry/608962	RHBDL1	RHBDL3, RHBDL2, RHBDL1
100158	105092	FBgn0030319	CG2533	CG2533	Negative	-	Positive	No	Negative	N		http://flybase.org/reports/FBgn0030319.html
105910	106166	FBgn0030331	CG15221	CG15221	Negative	-	Positive	No	Negative	N		http://flybase.org/reports/FBgn0030331.html	https://www.omim.org/entry/610291	SV2C	SV2A, SV2C
107751	110556	FBgn0030417	CG15725	CG15725	Negative	-	Positive	No	Negative			http://flybase.org/reports/FBgn0030417.html
104423	108699	FBgn0030477	dmrt11E	CG15749	Negative	-	Positive	No	Negative	Y	doublesex-Mab related 11E [Acc:FBgn0030477]	http://flybase.org/reports/FBgn0030477.html	http://www.omim.org/entry/604935	DMRT2	DMRTA2, DMRTB1, DMRT3, DMRTA1, DMRT1, DMRTC2, DMRT2
106459	102455	FBgn0030486	Set2	CG1716	Negative	-	Positive	No	Negative	N	SET domain containing 2 [Acc:FBgn0030486]	http://flybase.org/reports/FBgn0030486.html	http://www.omim.org/entry/612778	SETD2	SETD1A, SETD2
109529	113363	FBgn0030492	CG15754	CG15754	Negative	-	Positive	No	Negative	N		http://flybase.org/reports/FBgn0030492.html
100251	107264	FBgn0030494	Cpr12A	CG15757	Negative	-	Positive	No	Negative	N	Cuticular protein 12A [Acc:FBgn0030494]	http://flybase.org/reports/FBgn0030494.html
103608	101647	FBgn0030507	CG11164	CG11164	Negative	-	Positive	No	Negative	Y		http://flybase.org/reports/FBgn0030507.html	http://www.omim.org/entry/610326	RNASEH2B	RNASEH2B
104158	105542	FBgn0030525	CG10996	CG10996	Negative	-	Positive	No	Negative	N		http://flybase.org/reports/FBgn0030525.html	http://www.omim.org/entry/137030	GALM	GALM
103212	111073	FBgn0030540	CG11581	CG11581	Negative	-	Positive	No	Negative	Y		http://flybase.org/reports/FBgn0030540.html
108867	101306	FBgn0030574	CG9413	CG9413	Negative	-	Positive	No	Negative	N		http://flybase.org/reports/FBgn0030574.html	https://www.omim.org/entry/604144	SLC7A9	SLC7A10, SLC7A13, SLC7A7, SLC7A5, SLC7A8, SLC7A6, SLC7A9
109622	101443	FBgn0030582	CG14411	CG14411	Negative	-	Positive	No	Negative	N		http://flybase.org/reports/FBgn0030582.html		MTMR10	MTMR11, MTMR12, MTMR10
107574	107876	FBgn0030668	CG8128	CG8128	Negative	-	Positive	No	Negative			http://flybase.org/reports/FBgn0030668.html	http://www.omim.org/entry/606261	NUDT6	NUDT6
106842	109207	FBgn0030670	Pis	CG9245	Negative	-	Positive	No	Negative		Phosphatidylinositol synthase [Acc:FBgn0030670]	http://flybase.org/reports/FBgn0030670.html	http://www.omim.org/entry/605893	CDIPT	CDIPT
104940	112391	FBgn0030671	CG8134	CG8134	Negative	-	Positive	No	Negative	N		http://flybase.org/reports/FBgn0030671.html		F8A3	F8A1, F8A2, F8A3
103479	100015	FBgn0030678	CG11679	CG11679	Negative	-	Positive	No	Negative	N		http://flybase.org/reports/FBgn0030678.html	http://www.omim.org/entry/614917	RMND1	RMND1
110812	102763	FBgn0030685	Graf	CG8948	Negative	-	Positive	No	Negative	N	GTPase regulator associated with FAK [Acc:FBgn0030685]	http://flybase.org/reports/FBgn0030685.html	http://www.omim.org/entry/605370	ARHGAP26	OPHN1, ARHGAP42, ARHGAP10, ARHGAP26
100547	106982	FBgn0030725	CG8958	CG8958	Negative	-	Positive	No	Negative	N		http://flybase.org/reports/FBgn0030725.html		CNBD2	CNBD2
105288	108536	FBgn0030752	CG9947	CG9947	Negative	-	Positive	No	Negative	N		http://flybase.org/reports/FBgn0030752.html	http://www.omim.org/entry/611028	TMEM30A	TMEM30B, TMEM30A
101030	106637	FBgn0030803	CG4880	CG4880	Negative	-	Positive	No	Negative	Y		http://flybase.org/reports/FBgn0030803.html
110270	100099	FBgn0030805	wus	CG9089	Negative	-	Positive	No	Negative	Y	wurst [Acc:FBgn0030805]	http://flybase.org/reports/FBgn0030805.html		DNAJC22	DNAJC22
100502	104549	FBgn0030829	CG12998	CG12998	Negative	-	Positive	No	Negative	Y		http://flybase.org/reports/FBgn0030829.html
100682	107320	FBgn0030838	CG5445	CG5445	Negative	-	Positive	No	Negative	Y		http://flybase.org/reports/FBgn0030838.html	http://www.omim.org/entry/612217	C6orf106	C6orf106
105661	101817	FBgn0030864	CG8173	CG8173	Negative	-	Positive	No	Negative	Y		http://flybase.org/reports/FBgn0030864.html	http://www.omim.org/entry/611210	PBK	MAP3K20, PBK
104243	106275	FBgn0030881	CG12985	CG12985	Negative	-	Positive	No	Negative	N		http://flybase.org/reports/FBgn0030881.html
110013	115968	FBgn0030882	Gss1	CG6835	Negative	-	Positive	No	Negative		Glutathione Synthetase [Acc:FBgn0030882]	http://flybase.org/reports/FBgn0030882.html	http://www.omim.org/entry/601002	GSS	GSS
105607	100448	FBgn0030894	Mvb12	CG7192	Negative	-	Positive	No	Negative		Multivesicular body subunit 12 [Acc:FBgn0030894]	http://flybase.org/reports/FBgn0030894.html		MVB12A	MVB12B, MVB12A
104627	111396	FBgn0030931	Xrcc2	CG6318	Negative	-	Positive	No	Negative		X-ray repair cross complementing 2 [Acc:FBgn0030931]	http://flybase.org/reports/FBgn0030931.html	http://www.omim.org/entry/600375	XRCC2	XRCC2
102738	112316	FBgn0030938	CG15047	CG15047	Negative	-	Positive	No	Negative	N		http://flybase.org/reports/FBgn0030938.html
104162	105616	FBgn0030949	Cyp308a1	CG6585	Negative	-	Positive	No	Negative	Y		http://flybase.org/reports/FBgn0030949.html	http://www.omim.org/entry/274180	CYP3A43	TBXAS1, CYP3A43, CYP3A4, CYP3A5
106176	101226	FBgn0030960	Atg101	CG7053	Negative	-	Positive	No	Negative		Autophagy-related 101 [Acc:FBgn0030960]	http://flybase.org/reports/FBgn0030960.html	http://www.omim.org/entry/615089	ATG101	ATG101
106367	110394	FBgn0031022	CG12204	CG12204	Negative	-	Positive	No	Negative	Y		http://flybase.org/reports/FBgn0031022.html
106424	112290	FBgn0031033	CG14219	CG14219	Negative	-	Positive	No	Negative	Y		http://flybase.org/reports/FBgn0031033.html
109539	115452	FBgn0031074	SkpE	CG11942	Negative	-	Positive	No	Negative	N	SKP1-related E [Acc:FBgn0031074]	http://flybase.org/reports/FBgn0031074.html	http://www.omim.org/entry/601434	SKP1	SKP1
106196	102576	FBgn0031091	Phf7	CG9576	Negative	-	Positive	No	Negative	N	PHD finger protein 7 [Acc:FBgn0031091]	http://flybase.org/reports/FBgn0031091.html		PHF7	PHF6, PHF11, G2E3, PHF7
104656	111764	FBgn0031119	CG1812	CG1812	Negative	-	Positive	No	Negative	Y		http://flybase.org/reports/FBgn0031119.html		KLHL22	KLHL14, KLHL34, KLHL36, KLHL31, KLHL15, KLHL9, KLHL13, KLHL32, KLHL26, KLHL22
108370	106284	FBgn0031163	CG14579	CG14579	Negative	-	Positive	No	Negative	Y		http://flybase.org/reports/FBgn0031163.html
102833	105222	FBgn0031195	CG17600	CG17600	Negative	-	Positive	No	Negative	N		http://flybase.org/reports/FBgn0031195.html
109668	102715	FBgn0031233	Tbc1d15-17	CG11490	Negative	-	Positive	No	Negative	N	TBC1 domain family member 15/17 [Acc:FBgn0031233]	http://flybase.org/reports/FBgn0031233.html	http://www.omim.org/entry/612662	TBC1D15	TBC1D17, TBC1D15
103741	102351	FBgn0031239	CG17075	CG17075	Negative	-	Positive	No	Negative	N		http://flybase.org/reports/FBgn0031239.html		ZDHHC1	ZDHHC11B, ZDHHC11, ZDHHC1
102324	111340	FBgn0031249	CG11911	CG11911	Negative	-	Positive	No	Negative			http://flybase.org/reports/FBgn0031249.html
101147	104126	FBgn0031253	CG11885	CG11885	Negative	-	Positive	No	Negative			http://flybase.org/reports/FBgn0031253.html		PSMG3	PSMG3
110318	100599	FBgn0031260	Spp	CG11840	Negative	-	Positive	No	Negative	Y	Signal peptide peptidase [Acc:FBgn0031260]	http://flybase.org/reports/FBgn0031260.html	http://www.omim.org/entry/607106	HM13	HM13
101232	103968	FBgn0031292	CG15824	CG15824	Negative	-	Positive	No	Negative	Y		http://flybase.org/reports/FBgn0031292.html
101072	106803	FBgn0031301	CG14339	CG14339	Negative	-	Positive	No	Negative	Y		http://flybase.org/reports/FBgn0031301.html
106292	105778	FBgn0031317	Charon	CG5118	Negative	-	Positive	No	Negative	Y		http://flybase.org/reports/FBgn0031317.html
100396	104143	FBgn0031335	CG5565	CG5565	Negative	-	Positive	No	Negative	Y		http://flybase.org/reports/FBgn0031335.html	http://www.omim.org/entry/306480	PUDP	PUDP
105047	113129	FBgn0031365	CG17650	CG17650	Negative	-	Positive	No	Negative	N		http://flybase.org/reports/FBgn0031365.html
106352	109813	FBgn0031413	CG9967	CG9967	Negative	-	Positive	No	Negative			http://flybase.org/reports/FBgn0031413.html		MKRN2OS	MKRN2OS
100029	102999	FBgn0031419	CG15390	CG15390	Negative	-	Positive	No	Negative	Y		http://flybase.org/reports/FBgn0031419.html	https://www.omim.org/entry/615393	MTERF4	MTERF4
104324	107498	FBgn0031424	VGlut	CG9887	Negative	-	Positive	No	Negative	N	Vesicular glutamate transporter [Acc:FBgn0031424]	http://flybase.org/reports/FBgn0031424.html	http://www.omim.org/entry/607563	SLC17A6	SLC17A5, SLC17A8, SLC17A7, SLC17A6
102771	112392	FBgn0031426	CG18641	CG18641	Negative	-	Positive	No	Negative	Y		http://flybase.org/reports/FBgn0031426.html	http://www.omim.org/entry/609252	LIPI	LIPI
100337	105973	FBgn0031443	Prosbeta4R2	CG17302	Negative	-	Positive	No	Negative	N	Proteasome beta4 subunit-related 2 [Acc:FBgn0031443]	http://flybase.org/reports/FBgn0031443.html	http://www.omim.org/entry/602175	PSMB2	PSMB2
110597	108645	FBgn0031459	CG2862	CG2862	Negative	-	Positive	No	Negative	Y		http://flybase.org/reports/FBgn0031459.html	http://www.omim.org/entry/601314	HINT1	HINT2, HINT1
105309	110248	FBgn0031461	daw	CG16987	Negative	-	Positive	No	Negative		dawdle [Acc:FBgn0031461]	http://flybase.org/reports/FBgn0031461.html	http://www.omim.org/entry/190180	TGFB1	LEFTY1, LEFTY2, GDF10, MSTN, INHA, BMP3, GDF11, TGFB3, TGFB2, TGFB1
101772	109526	FBgn0031489	CG17224	CG17224	Negative	-	Positive	No	Negative	Y		http://flybase.org/reports/FBgn0031489.html	http://www.omim.org/entry/191730	UPP1	UPP2, UPP1
100453	104388	FBgn0031513	CG3347	CG3347	Negative	-	Positive	No	Negative	Y		http://flybase.org/reports/FBgn0031513.html	http://www.omim.org/entry/609150	CXXC1	CXXC1
107668	112831	FBgn0031559	CG3513	CG3513	Negative	-	Positive	No	Negative	Y		http://flybase.org/reports/FBgn0031559.html		SPINT2	APLP1, APLP2, APP, SPINT2
108972	105742	FBgn0031566	CG2818	CG2818	Negative	-	Positive	No	Negative	N		http://flybase.org/reports/FBgn0031566.html	http://www.omim.org/entry/614124	GPCPD1	GPCPD1
109287	101356	FBgn0031636	CG12194	CG12194	Negative	-	Positive	No	Negative	Y		http://flybase.org/reports/FBgn0031636.html		MFSD1	MFSD1
103378	100330	FBgn0031640	Mon1	CG11926	Negative	-	Positive	No	Negative		Monensin sensitivity 1 [Acc:FBgn0031640]	http://flybase.org/reports/FBgn0031640.html	http://www.omim.org/entry/611464	MON1A	MON1B, MON1A
110647	108344	FBgn0031681	Pgant5	CG31651	Negative	-	Positive	No	Negative	Y	polypeptide GalNAc transferase 5 [Acc:FBgn0031681]	http://flybase.org/reports/FBgn0031681.html	https://www.omim.org/entry/602273	GALNT13	GALNT1, GALNT13
102683	112153	FBgn0031745	rau	CG8965	Negative	-	Positive	No	Negative	N		http://flybase.org/reports/FBgn0031745.html
106418	112011	FBgn0031751	CG9016	CG9016	Negative	-	Positive	No	Negative	N		http://flybase.org/reports/FBgn0031751.html
107392	102909	FBgn0031766	CG9117	CG9117	Negative	-	Positive	No	Negative	Y		http://flybase.org/reports/FBgn0031766.html		MBLAC1	MBLAC1
100643	104094	FBgn0031802	ppk7	CG9499	Negative	-	Positive	No	Negative	Y	pickpocket 7 [Acc:FBgn0031802]	http://flybase.org/reports/FBgn0031802.html	http://www.omim.org/entry/606715	ASIC4	ASIC3, ASIC2, ASIC5, ASIC1, ASIC4
110258	106568	FBgn0031803	ppk14	CG9501	Negative	-	Positive	No	Negative	Y	pickpocket 14 [Acc:FBgn0031803]	http://flybase.org/reports/FBgn0031803.html	http://www.omim.org/entry/602866	ASIC1	ASIC3, ASIC2, ASIC5, ASIC4, ASIC1
107242	105147	FBgn0031887	CG11289	CG11289	Negative	-	Positive	No	Negative	Y		http://flybase.org/reports/FBgn0031887.html	http://www.omim.org/entry/603064	UGT2B10	UGT3A1, UGT3A2, UGT2B10
106081	106799	FBgn0031906	CG5160	CG5160	Negative	-	Positive	No	Negative	N		http://flybase.org/reports/FBgn0031906.html		RERG	RERG
103627	101821	FBgn0031952	cdc14	CG7134	Negative	-	Positive	No	Negative	Y	cell division cycle 14 [Acc:FBgn0031952]	http://flybase.org/reports/FBgn0031952.html	http://www.omim.org/entry/603505	CDC14A	CDC14C, CDC14B, CDC14A
108308	102465	FBgn0031955	CG14535	CG14535	Negative	-	Positive	No	Negative	Y		http://flybase.org/reports/FBgn0031955.html	http://www.omim.org/entry/614026	KIF26B	KIF26A, KIF26B
104177	107159	FBgn0031998	SLC5A11	CG8451	Negative	-	Positive	No	Negative		Sodium/solute co-transporter-like 5A11 [Acc:FBgn0031998]	http://flybase.org/reports/FBgn0031998.html	http://www.omim.org/entry/601843	SLC5A5	SLC5A6, SLC5A5, SLC5A8, SLC5A12
100618	108774	FBgn0032000	CG8372	CG8372	Negative	-	Positive	No	Negative	Y		http://flybase.org/reports/FBgn0032000.html		TMEM222	TMEM222
100899	106172	FBgn0032057	CG9287	CG9287	Negative	-	Positive	No	Negative			http://flybase.org/reports/FBgn0032057.html
100341	105986	FBgn0032058	CG9289	CG9289	Negative	-	Positive	No	Negative	N		http://flybase.org/reports/FBgn0032058.html		CES4A	CES4A, CES2, CES5A, CES1, CEL, CES3
107972	111682	FBgn0032086	CG17906	CG17906	Negative	-	Positive	No	Negative			http://flybase.org/reports/FBgn0032086.html
106941	104133	FBgn0032140	CG13117	CG13117	Negative	-	Positive	No	Negative	Y		http://flybase.org/reports/FBgn0032140.html
107793	105728	FBgn0032171	CG5846	CG5846	Negative	-	Positive	No	Negative	N		http://flybase.org/reports/FBgn0032171.html	http://www.omim.org/entry/603200	RFXANK	ANKRA2, RFXANK
104291	107074	FBgn0032312	CG14071	CG14071	Negative	-	Positive	No	Negative	Y		http://flybase.org/reports/FBgn0032312.html
100228	107174	FBgn0032329	Art8	CG16840	Negative	-	Positive	No	Negative	N	Arginine methyltransferase 8 [Acc:FBgn0032329]	http://flybase.org/reports/FBgn0032329.html	http://www.omim.org/entry/608274	PRMT6	PRMT2, PRMT6
100689	107505	FBgn0032350	CG6287	CG6287	Negative	-	Positive	No	Negative	Y		http://flybase.org/reports/FBgn0032350.html	http://www.omim.org/entry/606879	PHGDH	PHGDH
104079	113010	FBgn0032376	Tsp33B	CG14936	Negative	-	Positive	No	Negative	N	Tetraspanin 33B [Acc:FBgn0032376]	http://flybase.org/reports/FBgn0032376.html	https://www.omim.org/entry/613134	TSPAN3	TSPAN3
109926	112157	FBgn0032385	CG16964	CG16964	Negative	-	Positive	No	Negative	Y		http://flybase.org/reports/FBgn0032385.html
106697	102429	FBgn0032395	CG6734	CG6734	Negative	-	Positive	No	Negative	N		http://flybase.org/reports/FBgn0032395.html	http://www.omim.org/entry/614218	WDR81	WDR81
101803	109713	FBgn0032422	atilla	CG6579	Negative	-	Positive	No	Negative	Y		http://flybase.org/reports/FBgn0032422.html
106923	101173	FBgn0032453	CG6180	CG6180	Negative	-	Positive	No	Negative			http://flybase.org/reports/FBgn0032453.html	http://www.omim.org/entry/604591	PEBP1	PEBP4, PEBP1
105419	101457	FBgn0032456	MRP	CG6214	Negative	-	Positive	No	Negative		Multidrug-Resistance like Protein 1 [Acc:FBgn0032456]	http://flybase.org/reports/FBgn0032456.html	https://www.omim.org/entry/604323	ABCC3	LOC105369239, ABCC8, ABCC9, ABCC12, ABCC4, ABCC11, ABCC10, ABCC5, ABCC6, ABCC2, ABCC1, ABCC3
110693	101288	FBgn0032467	CG9934	CG9934	Negative	-	Positive	No	Negative	Y		http://flybase.org/reports/FBgn0032467.html	http://www.omim.org/entry/613565	UBE4B	UBE4B
100366	106075	FBgn0032479	CG16974	CG16974	Negative	-	Positive	No	Negative	Y		http://flybase.org/reports/FBgn0032479.html
106894	112267	FBgn0032494	CG5945	CG5945	Negative	-	Positive	No	Negative	Y		http://flybase.org/reports/FBgn0032494.html
107813	101629	FBgn0032586	Tpr2	CG4599	Negative	-	Positive	No	Negative	Y	Tetratricopeptide repeat protein 2 [Acc:FBgn0032586]	http://flybase.org/reports/FBgn0032586.html	http://omim.org/entry/601964	DNAJC7	DNAJC7
109429	108303	FBgn0032595	CG17996	CG17996	Negative	-	Positive	No	Negative	Y		http://flybase.org/reports/FBgn0032595.html	http://www.omim.org/entry/615166	CMC1	CMC1
104189	102712	FBgn0032642	CG5110	CG5110	Negative	-	Positive	No	Negative			http://flybase.org/reports/FBgn0032642.html	http://www.omim.org/entry/603296	LAMTOR3	LAMTOR3
102119	110808	FBgn0032658	CG5681	CG5681	Negative	-	Positive	No	Negative	Y		http://flybase.org/reports/FBgn0032658.html
101202	107130	FBgn0032660	elfless	CG15150	Negative	-	Positive	No	Negative			http://flybase.org/reports/FBgn0032660.html
104046	112549	FBgn0032669	CG15155	CG15155	Negative	-	Positive	No	Negative	N		http://flybase.org/reports/FBgn0032669.html	https://www.omim.org/entry/614763	GLYATL3	GLYAT, GLYATL1, GLYATL2, GLYATL3
107869	104594	FBgn0032730	CG10431	CG10431	Negative	-	Positive	No	Negative	Y		http://flybase.org/reports/FBgn0032730.html	http://www.omim.org/entry/609518	THAP3	THAP1, THAP3
100393	106154	FBgn0032733	CG15170	CG15170	Negative	-	Positive	No	Negative	Y		http://flybase.org/reports/FBgn0032733.html
105532	104437	FBgn0032734	CG15169	CG15169	Negative	-	Positive	No	Negative	N		http://flybase.org/reports/FBgn0032734.html
103707	100566	FBgn0032746	CG10470	CG10470	Negative	-	Positive	No	Negative			http://flybase.org/reports/FBgn0032746.html	http://www.omim.org/entry/614123	TMCO1	TMCO1
107452	109570	FBgn0032785	CG10026	CG10026	Negative	-	Positive	No	Negative			http://flybase.org/reports/FBgn0032785.html	https://www.omim.org/entry/600415	TTPA	RLBP1, CLVS1, CLVS2, TTPAL, TTPA
106400	111622	FBgn0032789	CG13083	CG13083	Negative	-	Positive	No	Negative	Y		http://flybase.org/reports/FBgn0032789.html
109511	109774	FBgn0032803	CG13082	CG13082	Negative	-	Positive	No	Negative	N		http://flybase.org/reports/FBgn0032803.html
109012	110543	FBgn0032813	PCNA2	CG10262	Negative	-	Positive	No	Negative	Y	Proliferating cell nuclear antigen 2 [Acc:FBgn0032813]	http://flybase.org/reports/FBgn0032813.html	http://www.omim.org/entry/176740	PCNA	PCNA
101787	109623	FBgn0032827	CG10481	CG10481	Negative	-	Positive	No	Negative	N		http://flybase.org/reports/FBgn0032827.html	http://www.omim.org/entry/605237	XPR1	XPR1
106224	105349	FBgn0032877	CG2617	CG2617	Negative	-	Positive	No	Negative	Y		http://flybase.org/reports/FBgn0032877.html	http://www.omim.org/entry/606130	RNF26	MGRN1, RNF157, RNF26
108211	102030	FBgn0032882	Ns4	CG9320	Negative	-	Positive	No	Negative	N	Nucleostemin 4 [Acc:FBgn0032882]	http://flybase.org/reports/FBgn0032882.html	http://www.omim.org/entry/143024	GNL1	GNL1
102486	111798	FBgn0032888	CheB38c	CG14405	Negative	-	Positive	No	Negative	Y	Chemosensory protein B 38c [Acc:FBgn0032888]	http://flybase.org/reports/FBgn0032888.html
102888	113196	FBgn0032900	CG14401	CG14401	Negative	-	Positive	No	Negative	Y		http://flybase.org/reports/FBgn0032900.html
104868	105757	FBgn0032925	CG9246	CG9246	Negative	-	Positive	No	Negative	N		http://flybase.org/reports/FBgn0032925.html	https://www.omim.org/entry/610770	NOC2L	NOC2L
103568	101287	FBgn0032929	Mcm10	CG9241	Negative	-	Positive	No	Negative	Y	Minichromosome maintenance 10 [Acc:FBgn0032929]	http://flybase.org/reports/FBgn0032929.html	http://www.omim.org/entry/609357	MCM10	MCM10
107776	104661	FBgn0032943	Tsp39D	CG8666	Negative	-	Positive	No	Negative	N	Tetraspanin 39D [Acc:FBgn0032943]	http://flybase.org/reports/FBgn0032943.html	http://www.omim.org/entry/155740	CD63	CD63
102815	103855	FBgn0032957	CG2225	CG2225	Negative	-	Positive	No	Negative	N		http://flybase.org/reports/FBgn0032957.html
103637	101863	FBgn0032961	CG1416	CG1416	Negative	-	Positive	No	Negative	N		http://flybase.org/reports/FBgn0032961.html	http://www.omim.org/entry/608466	AHSA1	AHSA2P, AHSA1
102031	110436	FBgn0033027	TpnC4	CG12408	Negative	-	Positive	No	Negative	N	Troponin C isoform 4 [Acc:FBgn0033027]	http://flybase.org/reports/FBgn0033027.html	https://www.omim.org/entry/114180	CALM1	CALM1
102031	110436	FBgn0033027	TpnC4	CG12408	Negative	-	Positive	No	Negative	N	Troponin C isoform 4 [Acc:FBgn0033027]	http://flybase.org/reports/FBgn0033027.html	https://www.omim.org/entry/114180	CALM1	CALM1
103562	101258	FBgn0033031	CG8245	CG8245	Negative	-	Positive	No	Negative			http://flybase.org/reports/FBgn0033031.html		TMEM53	NTPCR, TMEM53
109658	102289	FBgn0033038	CG7791	CG7791	Negative	-	Positive	No	Negative	N		http://flybase.org/reports/FBgn0033038.html	http://www.omim.org/entry/602241	MIPEP	MIPEP
105576	105812	FBgn0033048	CG7881	CG7881	Negative	-	Positive	No	Negative	N		http://flybase.org/reports/FBgn0033048.html	http://www.omim.org/entry/611034	SLC17A3	SLC17A8, SLC17A6, SLC17A7, SLC17A9, SLC17A5, SLC17A2, SLC17A3, SLC17A4, SLC17A1
106137	102796	FBgn0033075	Pld	CG12110	Negative	-	Positive	No	Negative	N	Phospholipase D [Acc:FBgn0033075]	http://flybase.org/reports/FBgn0033075.html	http://www.omim.org/entry/602384	PLD2	PLD1, PLD2
110097	108631	FBgn0033089	CG17266	CG17266	Negative	-	Positive	No	Negative	N		http://flybase.org/reports/FBgn0033089.html	https://www.omim.org/entry/606095	PPIH	PPIF, PPIB, PPIAL4C, PPIA, LOC105371242, PPIC, PPIAL4F, PPIAL4A, PPID, PPIG, NKTR, PPIH
101044	106693	FBgn0033130	Tsp42Ei	CG12843	Negative	-	Positive	No	Negative	Y	Tetraspanin 42Ei [Acc:FBgn0033130]	http://flybase.org/reports/FBgn0033130.html
104059	112603	FBgn0033170	sPLA2	CG11124	Negative	-	Positive	No	Negative	N	secretory Phospholipase A2 [Acc:FBgn0033170]	http://flybase.org/reports/FBgn0033170.html	https://www.omim.org/entry/611651	PLA2G3	PLA2G3
105790	110774	FBgn0033178	CG11127	CG11127	Negative	-	Positive	No	Negative			http://flybase.org/reports/FBgn0033178.html
107788	109140	FBgn0033215	CG1942	CG1942	Negative	-	Positive	No	Negative	N		http://flybase.org/reports/FBgn0033215.html	http://www.omim.org/entry/610270	MOGAT2	AWAT1, MOGAT3, AWAT2, DGAT2L6, MOGAT1, DGAT2, MOGAT2
106694	102359	FBgn0033225	TTLL12	CG1550	Negative	-	Positive	No	Negative	Y		http://flybase.org/reports/FBgn0033225.html		TTLL12	TTLL12
102244	111234	FBgn0033252	CG12769	CG12769	Negative	-	Positive	No	Negative	Y		http://flybase.org/reports/FBgn0033252.html	http://www.omim.org/entry/606234	IKZF2	IKZF2
100695	107672	FBgn0033274	CG14757	CG14757	Negative	-	Positive	No	Negative	Y		http://flybase.org/reports/FBgn0033274.html	http://www.omim.org/entry/613019	SDHAF2	SDHAF2
110522	110108	FBgn0033277	CG14760	CG14760	Negative	-	Positive	No	Negative	Y		http://flybase.org/reports/FBgn0033277.html
100346	106003	FBgn0033287	CG8701	CG8701	Negative	-	Positive	No	Negative	Y		http://flybase.org/reports/FBgn0033287.html
109845	110513	FBgn0033289	CG2121	CG2121	Negative	-	Positive	No	Negative	Y		http://flybase.org/reports/FBgn0033289.html	http://www.omim.org/entry/607995	UNC93A	UNC93A
108486	111591	FBgn0033292	Cyp4ad1	CG2110	Negative	-	Positive	No	Negative	N		http://flybase.org/reports/FBgn0033292.html	http://www.omim.org/entry/608614	CYP4V2	CYP19A1, CYP4A11, CYP4Z1, CYP4F3, CYP4B1, CYP4F2, CYP4F11, CYP4F22, CYP4F12, CYP4A22, CYP4V2
104735	103698	FBgn0033304	Cyp6a13	CG2397	Negative	-	Positive	No	Negative			http://flybase.org/reports/FBgn0033304.html	http://www.omim.org/entry/274180	CYP3A7-CYP3A51P	TBXAS1, CYP3A43, CYP3A4, CYP3A5, CYP3A7-CYP3A51P
101888	110140	FBgn0033312	CG8642	CG8642	Negative	-	Positive	No	Negative	N		http://flybase.org/reports/FBgn0033312.html	http://www.omim.org/entry/613357	FIBCD1	ANGPTL7, FCN1, FCN3, FCN2, FIBCD1
108697	105635	FBgn0033324	CG14744	CG14744	Negative	-	Positive	No	Negative	N		http://flybase.org/reports/FBgn0033324.html	http://www.omim.org/entry/609841	SLC8B1	SLC8B1
106686	102247	FBgn0033337	CG8272	CG8272	Negative	-	Positive	No	Negative	Y		http://flybase.org/reports/FBgn0033337.html		LRRC29	LRRC29
102728	112286	FBgn0033357	Tom7	CG8226	Negative	-	Positive	No	Negative	Y	Translocase of outer membrane 7 [Acc:FBgn0033357]	http://flybase.org/reports/FBgn0033357.html	http://www.omim.org/entry/607980	TOMM7	TOMM7
101982	110430	FBgn0033364	CG13747	CG13747	Negative	-	Positive	No	Negative	N		http://flybase.org/reports/FBgn0033364.html
105681	108392	FBgn0033391	CG8026	CG8026	Negative	-	Positive	No	Negative	N		http://flybase.org/reports/FBgn0033391.html	http://www.omim.org/entry/610815	SLC25A32	SLC25A32
109400	100171	FBgn0033392	CG8027	CG8027	Negative	-	Positive	No	Negative	N		http://flybase.org/reports/FBgn0033392.html	http://www.omim.org/entry/607840	GNPTAB	GNPTAB
102988	112994	FBgn0033397	Cyp4p3	CG10843	Negative	-	Positive	No	Negative	Y		http://flybase.org/reports/FBgn0033397.html		CYP4V2	CYP19A1, CYP4A11, CYP4F3, CYP4F2, CYP4A22, CYP4X1, CYP4F8, CYP4Z1, CYP4B1, CYP4F11, CYP4F22, CYP4F12, CYP4V2
106709	103533	FBgn0033427	Smyd4-1	CG1868	Negative	-	Positive	No	Negative	Y	SET and MYND domain containing, class 4, member 1 [Acc:FBgn0033427]	http://flybase.org/reports/FBgn0033427.html		SMYD4	SMYD4
106709	103533	FBgn0033427	Smyd4-1	CG1868	Negative	-	Positive	No	Negative	N	SET and MYND domain containing, class 4, member 1 [Acc:FBgn0033427]	http://flybase.org/reports/FBgn0033427.html		SMYD4	SMYD4
107655	110084	FBgn0033448	hebe	CG1623	Negative	-	Positive	No	Negative	Y		http://flybase.org/reports/FBgn0033448.html
110351	100921	FBgn0033457	Ntmt	CG1675	Negative	-	Positive	No	Negative	N	N-terminal methyltransferase [Acc:FBgn0033457]	http://flybase.org/reports/FBgn0033457.html	http://www.omim.org/entry/613560	NTMT1	METTL11B, NTMT1
107104	103785	FBgn0033481	CG12920	CG12920	Negative	-	Positive	No	Negative	Y		http://flybase.org/reports/FBgn0033481.html
106795	112213	FBgn0033499	CG12914	CG12914	Negative	-	Positive	No	Negative	Y		http://flybase.org/reports/FBgn0033499.html
107440	106849	FBgn0033501	CG12911	CG12911	Negative	-	Positive	No	Negative	Y		http://flybase.org/reports/FBgn0033501.html	http://www.omim.org/entry/610049
104553	110069	FBgn0033640	CG13198	CG13198	Negative	-	Positive	No	Negative	N		http://flybase.org/reports/FBgn0033640.html
102441	111662	FBgn0033652	ths	CG12443	Negative	-	Positive	No	Negative	N	thisbe [Acc:FBgn0033652]	http://flybase.org/reports/FBgn0033652.html
102370	111583	FBgn0033668	exp	CG13188	Negative	-	Positive	No	Negative	N	expansion [Acc:FBgn0033668]	http://flybase.org/reports/FBgn0033668.html
104285	107030	FBgn0033677	CG8321	CG8321	Negative	-	Positive	No	Negative	N		http://flybase.org/reports/FBgn0033677.html	http://www.omim.org/entry/616495	ARL6IP6	ARL6IP6
103400	100443	FBgn0033686	Hen1	CG12367	Negative	-	Positive	No	Negative	Y	Hen1 methyltransferase [Acc:FBgn0033686]	http://flybase.org/reports/FBgn0033686.html	http://www.omim.org/entry/612178	HENMT1	HENMT1
106594	104579	FBgn0033720	CG13160	CG13160	Negative	-	Positive	No	Negative	Y		http://flybase.org/reports/FBgn0033720.html	http://www.omim.org/entry/611156	ERMP1	ERMP1
104247	106301	FBgn0033726	Cpr49Ad	CG8836	Negative	-	Positive	No	Negative	Y	Cuticular protein 49Ad [Acc:FBgn0033726]	http://flybase.org/reports/FBgn0033726.html
103724	102105	FBgn0033737	Nup54	CG8831	Negative	-	Positive	No	Negative	N	Nucleoporin 54kD [Acc:FBgn0033737]	http://flybase.org/reports/FBgn0033737.html	http://www.omim.org/entry/607607	NUP54	NUP54
105801	111110	FBgn0033770	wuc	CG12442	Negative	-	Positive	No	Negative	Y	Wake-up-call [Acc:FBgn0033770]	http://flybase.org/reports/FBgn0033770.html		LIN52	LIN52
109584	107542	FBgn0033782	sug	CG3850	Negative	-	Positive	No	Negative	Y	sugarbabe [Acc:FBgn0033782]	http://flybase.org/reports/FBgn0033782.html	http://www.omim.org/entry/608539	GLIS2	GLIS2
101913	110221	FBgn0033798	CG15870	CG15870	Negative	-	Positive	No	Negative	Y		http://flybase.org/reports/FBgn0033798.html
102075	110619	FBgn0033827	CG17047	CG17047	Negative	-	Positive	No	Negative	N		http://flybase.org/reports/FBgn0033827.html
104271	106577	FBgn0033853	CG6145	CG6145	Negative	-	Positive	No	Negative	N		http://flybase.org/reports/FBgn0033853.html	http://www.omim.org/entry/611616	NADK	NADK
100675	107073	FBgn0033934	CG17385	CG17385	Negative	-	Positive	No	Negative			http://flybase.org/reports/FBgn0033934.html
102879	113164	FBgn0033953	CG12861	CG12861	Negative	-	Positive	No	Negative	N		http://flybase.org/reports/FBgn0033953.html
100719	108101	FBgn0034051	Mlf	CG8295	Negative	-	Positive	No	Negative	N	Myelodysplasia/myeloid leukemia factor [Acc:FBgn0034051]	http://flybase.org/reports/FBgn0034051.html	http://www.omim.org/entry/601401	MLF2	MLF1, MLF2
101271	105591	FBgn0034062	CG8388	CG8388	Negative	-	Positive	No	Negative	N		http://flybase.org/reports/FBgn0034062.html
108134	104942	FBgn0034076	Jhedup	CG8424	Negative	-	Positive	No	Negative	Y	Juvenile hormone esterase duplication [Acc:FBgn0034076]	http://flybase.org/reports/FBgn0034076.html		CES4A	CEL, CES2, CES4A, CES5A, CES1, CES3
107561	106151	FBgn0034082	CG10734	CG10734	Negative	-	Positive	No	Negative	Y		http://flybase.org/reports/FBgn0034082.html
100354	106042	FBgn0034128	CG4409	CG4409	Negative	-	Positive	No	Negative	N		http://flybase.org/reports/FBgn0034128.html
110602	108835	FBgn0034135	Syn2	CG4905	Negative	-	Positive	No	Negative	Y	Syntrophin-like 2 [Acc:FBgn0034135]	http://flybase.org/reports/FBgn0034135.html	http://www.omim.org/entry/608714	SNTG1	SNTG2, SNTG1
104556	110093	FBgn0034151	CG15617	CG15617	Negative	-	Positive	No	Negative	N		http://flybase.org/reports/FBgn0034151.html
103414	100619	FBgn0034184	CG9646	CG9646	Negative	-	Positive	No	Negative	N		http://flybase.org/reports/FBgn0034184.html		KIAA0930	KIAA0930
108755	110262	FBgn0034199	Gbp1	CG15917	Negative	-	Positive	No	Negative	Y	Growth-blocking peptide 1 [Acc:FBgn0034199]	http://flybase.org/reports/FBgn0034199.html
110052	105545	FBgn0034210	CG6568	CG6568	Negative	-	Positive	No	Negative	Y		http://flybase.org/reports/FBgn0034210.html
108304	102393	FBgn0034215	Mtap	CG4802	Negative	-	Positive	No	Negative	N	Methylthioadenosine phosphorylase [Acc:FBgn0034215]	http://flybase.org/reports/FBgn0034215.html	http://www.omim.org/entry/156540	MTAP	MTAP
100370	106083	FBgn0034263	CG10934	CG10934	Negative	-	Positive	No	Negative	N		http://flybase.org/reports/FBgn0034263.html
104577	108796	FBgn0034269	CG6406	CG6406	Negative	-	Positive	No	Negative	N		http://flybase.org/reports/FBgn0034269.html	http://www.omim.org/entry/610531	FAM126A	FAM126B, FAM126A
100283	107456	FBgn0034282	Mapmodulin	CG5784	Negative	-	Positive	No	Negative	N		http://flybase.org/reports/FBgn0034282.html		ANP32B	ANP32C, ANP32D, ANP32A, ANP32E, ANP32B
100172	105151	FBgn0034382	CG18609	CG18609	Negative	-	Positive	No	Negative	N		http://flybase.org/reports/FBgn0034382.html		ELOVL7	ELOVL5, ELOVL4, ELOVL2, ELOVL1, ELOVL7
101183	107059	FBgn0034406	Jheh3	CG15106	Negative	-	Positive	No	Negative	Y	Juvenile hormone epoxide hydrolase 3 [Acc:FBgn0034406]	http://flybase.org/reports/FBgn0034406.html	http://www.omim.org/entry/132810	EPHX1	EPHX1
106717	106208	FBgn0034415	CG15116	CG15116	Negative	-	Positive	No	Negative	Y		http://flybase.org/reports/FBgn0034415.html	http://www.omim.org/entry/138322	GPX7	GPX1, GPX8, GPX4, GPX7
105900	104230	FBgn0034437	CG10051	CG10051	Negative	-	Positive	No	Negative	Y		http://flybase.org/reports/FBgn0034437.html	http://www.omim.org/entry/611156	ERMP1	ERMP1
107231	104624	FBgn0034473	Or56a	CG12501	Negative	-	Positive	No	Negative	Y	Odorant receptor 56a [Acc:FBgn0034473]	http://flybase.org/reports/FBgn0034473.html
106859	109873	FBgn0034499	Cpr56F	CG9036	Negative	-	Positive	No	Negative	Y	Cuticular protein 56F [Acc:FBgn0034499]	http://flybase.org/reports/FBgn0034499.html
105944	108124	FBgn0034527	CG9945	CG9945	Negative	-	Positive	No	Negative	Y		http://flybase.org/reports/FBgn0034527.html	http://www.omim.org/entry/613317	DCAF11	DCAF11
104340	101837	FBgn0034528	CG11180	CG11180	Negative	-	Positive	No	Negative	Y		http://flybase.org/reports/FBgn0034528.html	http://www.omim.org/entry/606505	PINX1	PINX1
101895	110167	FBgn0034530	Rcd6	CG11175	Negative	-	Positive	No	Negative	N	Reduction in Cnn dots 6 [Acc:FBgn0034530]	http://flybase.org/reports/FBgn0034530.html
105555	104712	FBgn0034540	Lrt	CG11136	Negative	-	Positive	No	Negative	Y	Leucine-rich tendon-specific protein [Acc:FBgn0034540]	http://flybase.org/reports/FBgn0034540.html
102737	112315	FBgn0034583	CG10527	CG10527	Negative	-	Positive	No	Negative	Y		http://flybase.org/reports/FBgn0034583.html
110346	100836	FBgn0034585	Rbpn-5	CG4030	Negative	-	Positive	No	Negative	Y	Rabaptin-5 [Acc:FBgn0034585]	http://flybase.org/reports/FBgn0034585.html	http://www.omim.org/entry/603616	RABEP1	RABEP2, RABEP1
102724	112274	FBgn0034624	CG17974	CG17974	Negative	-	Positive	No	Negative			http://flybase.org/reports/FBgn0034624.html	http://www.omim.org/entry/607076	PI15	CLEC18C, CLEC18A, GLIPR1L2, CRISP2, GLIPR1, CRISP1, PI16, CRISPLD1, CLEC18B, CRISPLD2, GLIPR1L1, PI15, R3HDML
105275	106706	FBgn0034643	CG10321	CG10321	Negative	-	Positive	No	Negative	Y		http://flybase.org/reports/FBgn0034643.html
108269	105790	FBgn0034647	pirk	CG15678	Negative	-	Positive	No	Negative	N	poor Imd response upon knock-in [Acc:FBgn0034647]	http://flybase.org/reports/FBgn0034647.html
101344	108427	FBgn0034649	PIG-M	CG9865	Negative	-	Positive	No	Negative	Y	Phosphatidylinositol glycan anchor biosynthesis class M [Acc:FBgn0034649]	http://flybase.org/reports/FBgn0034649.html	http://www.omim.org/entry/610273	PIGM	PIGM
105991	102285	FBgn0034654	eIF3k	CG10306	Negative	-	Positive	No	Negative	Y	eukaryotic translation initiation factor 3 subunit k [Acc:FBgn0034654]	http://flybase.org/reports/FBgn0034654.html	http://www.omim.org/entry/609596	EIF3K	EIF3K
108079	100096	FBgn0034694	CG6613	CG6613	Negative	-	Positive	No	Negative	N		http://flybase.org/reports/FBgn0034694.html		PLEKHM1	PLEKHM1P1, PLEKHM3, PLEKHM1
102485	111796	FBgn0034721	CG11298	CG11298	Negative	-	Positive	No	Negative	Y		http://flybase.org/reports/FBgn0034721.html
102376	109148	FBgn0034753	CG2852	CG2852	Negative	-	Positive	No	Negative	N		http://flybase.org/reports/FBgn0034753.html	http://www.omim.org/entry/123841	PPIB	PPIF, PPIAL4C, PPIA, LOC105371242, PPID, PPIG, NKTR, PPIAL4F, PPIH, PPIAL4A, PPIC, PPIB
102099	110722	FBgn0034766	Obp59a	CG13517	Negative	-	Positive	No	Negative	N	Odorant-binding protein 59a [Acc:FBgn0034766]	http://flybase.org/reports/FBgn0034766.html
105143	102210	FBgn0034792	YME1L	CG3499	Negative	-	Positive	No	Negative	Y	YME1 like ATPase [Acc:FBgn0034792]	http://flybase.org/reports/FBgn0034792.html	http://www.omim.org/entry/607472	YME1L1	AFG3L2, YME1L1
108237	106926	FBgn0034796	CG3700	CG3700	Negative	-	Positive	No	Negative	N		http://flybase.org/reports/FBgn0034796.html
101523	108963	FBgn0034877	levy	CG17280	Negative	-	Positive	No	Negative	Y		http://flybase.org/reports/FBgn0034877.html	https://www.omim.org/entry/602072	COX6A1	COX6A1P2, COX6A2, COX6A1
107980	113252	FBgn0034885	Eglp4	CG4019	Negative	-	Positive	No	Negative	Y	Entomoglyceroporin 4 [Acc:FBgn0034885]	http://flybase.org/reports/FBgn0034885.html	http://www.omim.org/entry/601383	AQP6	AQP8, AQP2, AQP1, MIP, AQP4, AQP5, AQP6
105443	102813	FBgn0034938	CG3803	CG3803	Negative	-	Positive	No	Negative	N		http://flybase.org/reports/FBgn0034938.html	https://www.omim.org/entry/603646	COX15	COX15
106848	109291	FBgn0034957	CG3121	CG3121	Negative	-	Positive	No	Negative	N		http://flybase.org/reports/FBgn0034957.html	http://www.omim.org/entry/612647	RSPH4A	RSPH6A, RSPH4A
102672	105168	FBgn0035090	CG2736	CG2736	Negative	-	Positive	No	Negative	Y		http://flybase.org/reports/FBgn0035090.html	http://www.omim.org/entry/602257	SCARB1	SCARB2, CD36, SCARB1
106154	103252	FBgn0035137	CG1233	CG1233	Negative	-	Positive	No	Negative	Y		http://flybase.org/reports/FBgn0035137.html	http://www.omim.org/entry/614161
108681	104069	FBgn0035152	CG3386	CG3386	Negative	-	Positive	No	Negative	Y		http://flybase.org/reports/FBgn0035152.html
106725	106545	FBgn0035168	cep290	CG13889	Negative	-	Positive	No	Negative			http://flybase.org/reports/FBgn0035168.html	http://www.omim.org/entry/610142	CEP290	CEP290
107527	111849	FBgn0035179	CG12038	CG12038	Negative	-	Positive	No	Negative	N		http://flybase.org/reports/FBgn0035179.html	https://www.omim.org/entry/614544	FAM69C	FAM69B, FAM69A, FAM69C
106740	106951	FBgn0035196	CG9129	CG9129	Negative	-	Positive	No	Negative	Y		http://flybase.org/reports/FBgn0035196.html
108903	105724	FBgn0035204	CG2277	CG2277	Negative	-	Positive	No	Negative	Y		http://flybase.org/reports/FBgn0035204.html		NT5DC1	NT5DC1
104545	109991	FBgn0035256	CG13930	CG13930	Negative	-	Positive	No	Negative	Y		http://flybase.org/reports/FBgn0035256.html		WDR78	WDR78
105418	101451	FBgn0035321	CG1275	CG1275	Negative	-	Positive	No	Negative	N		http://flybase.org/reports/FBgn0035321.html	https://www.omim.org/entry/605745	CYBRD1	CYB561A3, CYB561, CYBRD1
107909	111492	FBgn0035355	CG16985	CG16985	Negative	-	Positive	No	Negative	N		http://flybase.org/reports/FBgn0035355.html	http://www.omim.org/entry/615652	ACOT13	ACOT13
108187	105139	FBgn0035384	CG2113	CG2113	Negative	-	Positive	No	Negative			http://flybase.org/reports/FBgn0035384.html	http://www.omim.org/entry/609747	ABRA	ABRACL, ABRA
100821	102898	FBgn0035415	CG14966	CG14966	Negative	-	Positive	No	Negative	N		http://flybase.org/reports/FBgn0035415.html		C15orf40	C15orf40
100178	105177	FBgn0035425	CG17746	CG17746	Negative	-	Positive	No	Negative	Y		http://flybase.org/reports/FBgn0035425.html	https://www.omim.org/entry/606108	PPM1A	PPM1B, PPM1A
108807	111763	FBgn0035481	CG12605	CG12605	Negative	-	Positive	No	Negative	N		http://flybase.org/reports/FBgn0035481.html	http://www.omim.org/entry/605858	SCRT1	MYNN, SCRT2, SCRT1
104932	112334	FBgn0035495	CG14989	CG14989	Negative	-	Positive	No	Negative	Y		http://flybase.org/reports/FBgn0035495.html
106455	102197	FBgn0035499	Chd64	CG14996	Negative	-	Positive	No	Negative	N		http://flybase.org/reports/FBgn0035499.html	http://www.omim.org/entry/604634	TAGLN2	CNN2, CNN1, CNN3, TAGLN3, TAGLN2, TAGLN
108705	106257	FBgn0035501	CG1299	CG1299	Negative	-	Positive	No	Negative	Y		http://flybase.org/reports/FBgn0035501.html
108625	101912	FBgn0035533	Cip4	CG15015	Negative	-	Positive	No	Negative		Cdc42-interacting protein 4 [Acc:FBgn0035533]	http://flybase.org/reports/FBgn0035533.html	http://www.omim.org/entry/604504	TRIP10	FNBP1L, FNBP1, TRIP10
102427	111640	FBgn0035541	CG15019	CG15019	Negative	-	Positive	No	Negative	Y		http://flybase.org/reports/FBgn0035541.html	https://www.omim.org/entry/616998	LLPH	LLPH
109562	115703	FBgn0035581	Dnah3	CG17150	Negative	-	Positive	No	Negative	N	dynein, axonemal, heavy chain 3 [Acc:FBgn0035581]	http://flybase.org/reports/FBgn0035581.html	http://www.omim.org/entry/603334	DNAH3	DNAH1, DNAH6, DNAH7, DNAH12, DNAH3
108804	107234	FBgn0035584	CG17030	CG17030	Negative	-	Positive	No	Negative	N		http://flybase.org/reports/FBgn0035584.html	http://www.omim.org/entry/603721	UBE2L3	UBE2L6, UBE2L3
101582	103901	FBgn0035594	CG4597	CG4597	Negative	-	Positive	No	Negative	N		http://flybase.org/reports/FBgn0035594.html
109806	108096	FBgn0035643	CG13287	CG13287	Negative	-	Positive	No	Negative	Y		http://flybase.org/reports/FBgn0035643.html	http://www.omim.org/entry/616639	PRDM8	ZNF488, PRDM8
108820	110197	FBgn0035666	Jon65Aii	CG6580	Negative	-	Positive	No	Negative	N	Jonah 65Aii [Acc:FBgn0035666]	http://flybase.org/reports/FBgn0035666.html
103787	102714	FBgn0035679	CG10467	CG10467	Negative	-	Positive	No	Negative	Y		http://flybase.org/reports/FBgn0035679.html	http://www.omim.org/entry/137030	GALM	GALM
110232	112732	FBgn0035690	CG10274	CG10274	Negative	-	Positive	No	Negative			http://flybase.org/reports/FBgn0035690.html
102867	106144	FBgn0035711	CG8519	CG8519	Negative	-	Positive	No	Negative	Y		http://flybase.org/reports/FBgn0035711.html	http://www.omim.org/entry/612403	RASL11A	RERG, RERGL, RASL11B, RASL11A
100771	108546	FBgn0035715	CG10103	CG10103	Negative	-	Positive	No	Negative	N		http://flybase.org/reports/FBgn0035715.html	http://www.omim.org/entry/616434	IST1	IST1
101575	103883	FBgn0035763	CG8602	CG8602	Negative	-	Positive	No	Negative	Y		http://flybase.org/reports/FBgn0035763.html		MFSD1	MFSD1
109291	101535	FBgn0035767	Cln7	CG8596	Negative	-	Positive	No	Negative	Y		http://flybase.org/reports/FBgn0035767.html	http://www.omim.org/entry/611124	MFSD8	MFSD8
108349	108422	FBgn0035849	ERR	CG7404	Negative	-	Positive	No	Negative	Y	estrogen-related receptor [Acc:FBgn0035849]	http://flybase.org/reports/FBgn0035849.html	http://www.omim.org/entry/602969	ESRRG	NR3C1, AR, ESR2, PGR, ESR1, NR3C2, ESRRA, ESRRB, ESRRG
103588	101516	FBgn0035879	GAPcenA	CG7112	Negative	-	Positive	No	Negative		GTPase activating protein and centrosome-associated [Acc:FBgn0035879]	http://flybase.org/reports/FBgn0035879.html	http://www.omim.org/entry/615882	RABGAP1	RABGAP1L, RABGAP1
103588	101516	FBgn0035879	GAPcenA	CG7112	Negative	-	Positive	No	Negative		GTPase activating protein and centrosome-associated [Acc:FBgn0035879]	http://flybase.org/reports/FBgn0035879.html	http://www.omim.org/entry/615882	RABGAP1	RABGAP1L, RABGAP1
109097	115532	FBgn0035887	Jon66Cii	CG7170	Negative	-	Positive	No	Negative	N	Jonah 66Cii [Acc:FBgn0035887]	http://flybase.org/reports/FBgn0035887.html
110396	101310	FBgn0035916	GAPsec	CG5978	Negative	-	Positive	No	Negative		GTPase activating protein, SECIS-dependent read-through [Acc:FBgn0035916]	http://flybase.org/reports/FBgn0035916.html	http://www.omim.org/entry/616218	TBC1D13	TBC1D13
107670	112845	FBgn0035949	CG13314	CG13314	Negative	-	Positive	No	Negative	N		http://flybase.org/reports/FBgn0035949.html
106132	102722	FBgn0035993	Nf-YA	CG3891	Negative	-	Positive	No	Negative	Y	Nuclear factor Y-box A [Acc:FBgn0035993]	http://flybase.org/reports/FBgn0035993.html	http://www.omim.org/entry/189903	NFYA	NFYA
108324	105751	FBgn0036000	CG3434	CG3434	Negative	-	Positive	No	Negative	N		http://flybase.org/reports/FBgn0036000.html		QTRT2	QTRT2
104424	108700	FBgn0036005	pall	CG3428	Negative	-	Positive	No	Negative	N	pallbearer [Acc:FBgn0036005]	http://flybase.org/reports/FBgn0036005.html	http://www.omim.org/entry/609100	FBXO28	FBXO28
100519	104735	FBgn0036007	path	CG3424	Negative	-	Positive	No	Negative	Y	pathetic [Acc:FBgn0036007]	http://flybase.org/reports/FBgn0036007.html	https://www.omim.org/entry/608332	SLC36A3	SLC36A3, SLC36A4, SLC36A2, SLC36A1
103225	111478	FBgn0036044	Zasp67	CG14168	Negative	-	Positive	No	Negative	N	Z band alternatively spliced PDZ-motif protein 67 [Acc:FBgn0036044]	http://flybase.org/reports/FBgn0036044.html
110271	100117	FBgn0036052	CG10809	CG10809	Negative	-	Positive	No	Negative			http://flybase.org/reports/FBgn0036052.html	http://www.omim.org/entry/613383	ANKRD54	ANKRD54
105196	112720	FBgn0036056	CG6709	CG6709	Negative	-	Positive	No	Negative	Y		http://flybase.org/reports/FBgn0036056.html	http://www.omim.org/entry/608773
110291	108707	FBgn0036058	CG6707	CG6707	Negative	-	Positive	No	Negative	Y		http://flybase.org/reports/FBgn0036058.html	http://www.omim.org/entry/609865	PIP4P1	PIP4P2, PIP4P1
107226	104364	FBgn0036063	CG6674	CG6674	Negative	-	Positive	No	Negative			http://flybase.org/reports/FBgn0036063.html	http://www.omim.org/entry/603852	TSSC4	TSSC4
100865	104934	FBgn0036085	CG6527	CG6527	Negative	-	Positive	No	Negative	N		http://flybase.org/reports/FBgn0036085.html
107984	103153	FBgn0036153	CG7573	CG7573	Negative	-	Positive	No	Negative			http://flybase.org/reports/FBgn0036153.html	http://www.omim.org/entry/606480	ZMPSTE24	ZMPSTE24
109912	108478	FBgn0036180	Duba	CG6091	Negative	-	Positive	No	Negative	N	Deubiquitinating enzyme A [Acc:FBgn0036180]	http://flybase.org/reports/FBgn0036180.html	http://www.omim.org/entry/300713	OTUD5	OTUD5
110048	104371	FBgn0036221	CG11588	CG11588	Negative	-	Positive	No	Negative	N		http://flybase.org/reports/FBgn0036221.html	http://www.omim.org/entry/610527	TMX1	TMX1
102914	113334	FBgn0036290	CG10638	CG10638	Negative	-	Positive	No	Negative	Y		http://flybase.org/reports/FBgn0036290.html	http://www.omim.org/entry/604707	AKR1A1	AKR1B15, AKR1C2, AKR1E2, AKR1C3, AKR1C4, AKR1B10, AKR1B1, AKR1D1, AKR1A1
106017	112611	FBgn0036360	CG10713	CG10713	Negative	-	Positive	No	Negative	N		http://flybase.org/reports/FBgn0036360.html
109466	104607	FBgn0036395	CG17361	CG17361	Negative	-	Positive	No	Negative	N		http://flybase.org/reports/FBgn0036395.html
109920	110580	FBgn0036438	goddard	CG13477	Negative	-	Positive	No	Negative	N		http://flybase.org/reports/FBgn0036438.html
102723	112270	FBgn0036503	CG13454	CG13454	Negative	-	Positive	No	Negative	Y		http://flybase.org/reports/FBgn0036503.html
107954	101498	FBgn0036571	Strumpellin	CG12272	Negative	-	Positive	No	Negative	Y		http://flybase.org/reports/FBgn0036571.html	https://www.omim.org/entry/610657	WASHC5	WASHC5
101878	110098	FBgn0036575	CG5157	CG5157	Negative	-	Positive	No	Negative			http://flybase.org/reports/FBgn0036575.html	http://www.omim.org/entry/611964	CYB5B	CYB5A, CYB5B
102328	111346	FBgn0036599	CG13044	CG13044	Negative	-	Positive	No	Negative	Y		http://flybase.org/reports/FBgn0036599.html
100392	106152	FBgn0036641	Smn	CG16725	Negative	-	Positive	No	Negative	Y	survival motor neuron [Acc:FBgn0036641]	http://flybase.org/reports/FBgn0036641.html	http://www.omim.org/entry/601627	SMN2	SMN1, SMN2
100392	106152	FBgn0036641	Smn	CG16725	Negative	-	Positive	No	Negative	Y	survival motor neuron [Acc:FBgn0036641]	http://flybase.org/reports/FBgn0036641.html	http://www.omim.org/entry/601627	SMN2	SMN1, SMN2
107014	101612	FBgn0036643	Syx8	CG4109	Negative	-	Positive	No	Negative		Syntaxin 8 [Acc:FBgn0036643]	http://flybase.org/reports/FBgn0036643.html	https://www.omim.org/entry/604203	STX8	STX8
109710	104308	FBgn0036654	CG9692	CG9692	Negative	-	Positive	No	Negative	Y		http://flybase.org/reports/FBgn0036654.html
105406	101095	FBgn0036659	CG9701	CG9701	Negative	-	Positive	No	Negative	Y		http://flybase.org/reports/FBgn0036659.html	http://www.omim.org/entry/617060	LCTL	KLB, GBA3, LCT, KL, LCTL
100170	105140	FBgn0036663	CG9674	CG9674	Negative	-	Positive	No	Negative	Y		http://flybase.org/reports/FBgn0036663.html
109629	101663	FBgn0036702	CG6512	CG6512	Negative	-	Positive	No	Negative	N		http://flybase.org/reports/FBgn0036702.html	http://www.omim.org/entry/604581	AFG3L2	SPG7, AFG3L2
101801	109710	FBgn0036716	CG13728	CG13728	Negative	-	Positive	No	Negative	Y		http://flybase.org/reports/FBgn0036716.html
108642	102370	FBgn0036754	CG5589	CG5589	Negative	-	Positive	No	Negative	Y		http://flybase.org/reports/FBgn0036754.html	https://www.omim.org/entry/612500	DDX52	DDX52
105655	101616	FBgn0036772	CG5290	CG5290	Negative	-	Positive	No	Negative	Y		http://flybase.org/reports/FBgn0036772.html		TTC27	TTC27
110739	106759	FBgn0036790	AstC-R1	CG7285	Negative	-	Positive	No	Negative	N	Allatostatin C receptor 1 [Acc:FBgn0036790]	http://flybase.org/reports/FBgn0036790.html	http://www.omim.org/entry/182452	SSTR2	NPBWR2, OPRK1, OPRL1, NPBWR1, MCHR1, OPRD1, OPRM1, SSTR3, SSTR4, SSTR5, SSTR1, SSTR2
102359	111558	FBgn0036822	NijB	CG11637	Negative	-	Positive	No	Negative	Y	Ninjurin B [Acc:FBgn0036822]	http://flybase.org/reports/FBgn0036822.html	http://www.omim.org/entry/607297	NINJ2	NINJ1, NINJ2
102794	112454	FBgn0036832	CG18223	CG18223	Negative	-	Positive	No	Negative	N		http://flybase.org/reports/FBgn0036832.html
108653	100476	FBgn0036838	CG3808	CG3808	Negative	-	Positive	No	Negative	N		http://flybase.org/reports/FBgn0036838.html	http://www.omim.org/entry/611151	TRMT2A	TRMT2B, TRMT2A
103759	102475	FBgn0036846	MESR6	CG6818	Negative	-	Positive	No	Negative		Misexpression suppressor of ras 6 [Acc:FBgn0036846]	http://flybase.org/reports/FBgn0036846.html		C5orf22	C5orf22
102891	113216	FBgn0036860	CG14086	CG14086	Negative	-	Positive	No	Negative	Y		http://flybase.org/reports/FBgn0036860.html		TMEM72	TMEM72
102991	113027	FBgn0036875	CG9449	CG9449	Negative	-	Positive	No	Negative	N		http://flybase.org/reports/FBgn0036875.html	http://www.omim.org/entry/171790	ACPP	ACP4, ACP2, ACPP
109721	105431	FBgn0036876	CG9451	CG9451	Negative	-	Positive	No	Negative			http://flybase.org/reports/FBgn0036876.html	http://www.omim.org/entry/606362	ACP4	ACP4, ACP2, ACPP
102778	112418	FBgn0036924	hale	CG7570	Negative	-	Positive	No	Negative	Y	hale-bopp [Acc:FBgn0036924]	http://flybase.org/reports/FBgn0036924.html
106202	102773	FBgn0036939	CG7365	CG7365	Negative	-	Positive	No	Negative			http://flybase.org/reports/FBgn0036939.html	http://www.omim.org/entry/610179	PLB1	PLB1
100815	108794	FBgn0036980	RhoBTB	CG5701	Negative	-	Positive	No	Negative	Y	Rho-related BTB domain containing [Acc:FBgn0036980]	http://flybase.org/reports/FBgn0036980.html	http://www.omim.org/entry/607352	RHOBTB2	RHOBTB1, RHOBTB2
109822	109354	FBgn0037009	CG5104	CG5104	Negative	-	Positive	No	Negative			http://flybase.org/reports/FBgn0037009.html		SFT2D1	SFT2D2, SFT2D1
102110	110769	FBgn0037016	CG13252	CG13252	Negative	-	Positive	No	Negative			http://flybase.org/reports/FBgn0037016.html	http://www.omim.org/entry/606189
103546	100912	FBgn0037022	CG11396	CG11396	Negative	-	Positive	No	Negative			http://flybase.org/reports/FBgn0037022.html	http://www.omim.org/entry/614139	TRAPPC12	TRAPPC12
106620	106818	FBgn0037045	CG10584	CG10584	Negative	-	Positive	No	Negative	Y		http://flybase.org/reports/FBgn0037045.html	http://www.omim.org/entry/615261	METTL22	METTL22
106620	106818	FBgn0037045	CG10584	CG10584	Negative	-	Positive	No	Negative	N		http://flybase.org/reports/FBgn0037045.html	http://www.omim.org/entry/615261	METTL22	METTL22
102744	112328	FBgn0037060	CG10508	CG10508	Negative	-	Positive	No	Negative	N		http://flybase.org/reports/FBgn0037060.html
109826	109593	FBgn0037067	Cpr78Ca	CG11310	Negative	-	Positive	No	Negative	N	Cuticular protein 78Ca [Acc:FBgn0037067]	http://flybase.org/reports/FBgn0037067.html
105556	104743	FBgn0037100	CapaR	CG14575	Negative	-	Positive	No	Negative	N	Capability receptor [Acc:FBgn0037100]	http://flybase.org/reports/FBgn0037100.html	http://www.omim.org/entry/605108	NMUR2	NTSR1, NTSR2, MLNR, GHSR, NMUR1, NMUR2
107945	112459	FBgn0037107	CG7166	CG7166	Negative	-	Positive	No	Negative			http://flybase.org/reports/FBgn0037107.html		IGLON5	IGLON5, NEGR1, OPCML, LSAMP, NTM
107918	106236	FBgn0037114	Cpr78E	CG7160	Negative	-	Positive	No	Negative	Y	Cuticular protein 78E [Acc:FBgn0037114]	http://flybase.org/reports/FBgn0037114.html
104135	105100	FBgn0037116	Als2	CG7158	Negative	-	Positive	No	Negative	N	Amyotrophic lateral sclerosis 2 [Acc:FBgn0037116]	http://flybase.org/reports/FBgn0037116.html	http://www.omim.org/entry/606352	ALS2	ALS2CL, ALS2
105803	111262	FBgn0037133	CG7370	CG7370	Negative	-	Positive	No	Negative	Y		http://flybase.org/reports/FBgn0037133.html
102236	111214	FBgn0037143	CR7448	CR7448	Negative	-	Positive	No	Negative	Y		http://flybase.org/reports/FBgn0037143.html
104097	103978	FBgn0037153	olf413	CG12673	Negative	-	Positive	No	Negative	Y		http://flybase.org/reports/FBgn0037153.html	https://www.omim.org/entry/609000	MOXD1	DBH, MOXD2P, MOXD1
106810	108250	FBgn0037156	CG11523	CG11523	Negative	-	Positive	No	Negative	N		http://flybase.org/reports/FBgn0037156.html	http://www.omim.org/entry/616605	GSKIP	GSKIP
100335	105967	FBgn0037225	TwdlG	CG14643	Negative	-	Positive	No	Negative	Y	TweedleG [Acc:FBgn0037225]	http://flybase.org/reports/FBgn0037225.html
100295	107601	FBgn0037231	Vps24	CG9779	Negative	-	Positive	No	Negative	Y	Vacuolar protein sorting 24 [Acc:FBgn0037231]	http://flybase.org/reports/FBgn0037231.html	http://www.omim.org/entry/610052	RNF103-CHMP3	CHMP3, RNF103-CHMP3
100295	107601	FBgn0037231	Vps24	CG9779	Negative	-	Positive	No	Negative	Y	Vacuolar protein sorting 24 [Acc:FBgn0037231]	http://flybase.org/reports/FBgn0037231.html	http://www.omim.org/entry/610052	RNF103-CHMP3	CHMP3, RNF103-CHMP3
109445	108672	FBgn0037239	Sfxn1-3	CG11739	Negative	-	Positive	No	Negative	N	Sideroflexin 1/3 [Acc:FBgn0037239]	http://flybase.org/reports/FBgn0037239.html	http://www.omim.org/entry/615569	SFXN1	SFXN2, SFXN5, SFXN3, SFXN1
103531	112802	FBgn0037340	CG14671	CG14671	Negative	-	Positive	No	Negative	Y		http://flybase.org/reports/FBgn0037340.html	http://www.omim.org/entry/613734	CCDC115	CCDC115
105727	107640	FBgn0037347	CG1427	CG1427	Negative	-	Positive	No	Negative			http://flybase.org/reports/FBgn0037347.html	http://www.omim.org/entry/613009	SEPSECS	SEPSECS
105727	107640	FBgn0037347	CG1427	CG1427	Negative	-	Positive	No	Negative			http://flybase.org/reports/FBgn0037347.html	http://www.omim.org/entry/613009	SEPSECS	SEPSECS
103372	100305	FBgn0037377	CG1218	CG1218	Negative	-	Positive	No	Negative	Y		http://flybase.org/reports/FBgn0037377.html	http://www.omim.org/entry/616614	HPF1	HPF1
105724	107148	FBgn0037416	Osi9	CG15592	Negative	-	Positive	No	Negative		Osiris 9 [Acc:FBgn0037416]	http://flybase.org/reports/FBgn0037416.html
109001	108665	FBgn0037442	godzilla	CG10277	Negative	-	Positive	No	Negative	Y	godzilla E3 ubiquitin protein ligase [Acc:FBgn0037442]	http://flybase.org/reports/FBgn0037442.html	http://www.omim.org/entry/609247	RNF13	ZNRF4, RNF167, RNF13
109002	108843	FBgn0037447	Neurochondrin	CG2330	Negative	-	Positive	No	Negative	Y		http://flybase.org/reports/FBgn0037447.html	http://www.omim.org/entry/608458	NCDN	NCDN
105684	110340	FBgn0037448	CG15186	CG15186	Negative	-	Positive	No	Negative	Y		http://flybase.org/reports/FBgn0037448.html
103744	102380	FBgn0037472	CG10098	CG10098	Negative	-	Positive	No	Negative	N		http://flybase.org/reports/FBgn0037472.html	http://www.omim.org/entry/614967	SCRN3	SCRN1, SCRN2, SCRN3
104464	109005	FBgn0037482	CG10055	CG10055	Negative	-	Positive	No	Negative			http://flybase.org/reports/FBgn0037482.html	http://www.omim.org/entry/613663	SHQ1	SHQ1
108163	103419	FBgn0037517	CG10086	CG10086	Negative	-	Positive	No	Negative	Y		http://flybase.org/reports/FBgn0037517.html	https://www.omim.org/entry/606599	ARRDC1	ARRDC5, ARRDC2, ARRDC4, ARRDC3, TXNIP, ARRDC1
108566	101201	FBgn0037544	CG11035	CG11035	Negative	-	Positive	No	Negative	N		http://flybase.org/reports/FBgn0037544.html		DNAJC30	DNAJC30
104484	109247	FBgn0037550	CG9667	CG9667	Negative	-	Positive	No	Negative	Y		http://flybase.org/reports/FBgn0037550.html	http://www.omim.org/entry/612764	ISY1-RAB43	ISY1, ISY1-RAB43
106117	112147	FBgn0037577	CG7443	CG7443	Negative	-	Positive	No	Negative	Y		http://flybase.org/reports/FBgn0037577.html
102812	112503	FBgn0037579	COX7AL	CG18193	Negative	-	Positive	No	Negative	Y	Cytochrome c oxidase subunit 7A-like [Acc:FBgn0037579]	http://flybase.org/reports/FBgn0037579.html	http://www.omim.org/entry/123995	COX7A1	COX7A2P2, COX7A2L, COX7A2, COX7A1
106732	106836	FBgn0037590	Or85b	CG11735	Negative	-	Positive	No	Negative		Odorant receptor 85b [Acc:FBgn0037590]	http://flybase.org/reports/FBgn0037590.html
108652	100284	FBgn0037606	CG8032	CG8032	Negative	-	Positive	No	Negative	Y		http://flybase.org/reports/FBgn0037606.html	http://www.omim.org/entry/615853	PAOX	SMOX, PAOX
105633	101051	FBgn0037607	CG8036	CG8036	Negative	-	Positive	No	Negative	Y		http://flybase.org/reports/FBgn0037607.html	http://www.omim.org/entry/606781	TKTL2	TKTL1, TKT, TKTL2
101455	109212	FBgn0037715	CG9399	CG9399	Negative	-	Positive	No	Negative	Y		http://flybase.org/reports/FBgn0037715.html	http://www.omim.org/entry/614737	MPC2	MPC2
105561	104773	FBgn0037753	CG12947	CG12947	Negative	-	Positive	No	Negative	Y		http://flybase.org/reports/FBgn0261722.html	http://omim.org/entry/613104
104321	107439	FBgn0037756	CG8507	CG8507	Negative	-	Positive	No	Negative	N		http://flybase.org/reports/FBgn0037756.html	http://www.omim.org/entry/104225	LRPAP1	LRPAP1
102107	110759	FBgn0037829	CG14691	CG14691	Negative	-	Positive	No	Negative			http://flybase.org/reports/FBgn0037829.html	http://www.omim.org/entry/185860	SV2A	SV2B, SV2C, SV2A
102046	110509	FBgn0037848	Tsp86D	CG4591	Negative	-	Positive	No	Negative		Tetraspanin 86D [Acc:FBgn0037848]	http://flybase.org/reports/FBgn0037848.html	http://www.omim.org/entry/610120	TSPAN33	TSPAN15, TSPAN5, TSPAN17, TSPAN14, TSPAN33
103951	102955	FBgn0037884	Arfip	CG17184	Negative	-	Positive	No	Negative	Y	Arfaptin [Acc:FBgn0037884]	http://flybase.org/reports/FBgn0037884.html	http://www.omim.org/entry/601638	ARFIP2	ARFIP1, ARFIP2
104237	103670	FBgn0037935	CG6834	CG6834	Negative	-	Positive	No	Negative	Y		http://flybase.org/reports/FBgn0037935.html
101696	105484	FBgn0037964	CG14731	CG14731	Negative	-	Positive	No	Negative	Y		http://flybase.org/reports/FBgn0037964.html
109013	110811	FBgn0037970	GC2	CG12201	Negative	-	Positive	No	Negative	Y	Glutamate Carrier 2 [Acc:FBgn0037970]	http://flybase.org/reports/FBgn0037970.html	http://www.omim.org/entry/609302	SLC25A22	SLC25A18, SLC25A22
106222	105334	FBgn0038008	CG3942	CG3942	Negative	-	Positive	No	Negative	Y		http://flybase.org/reports/FBgn0038008.html	http://www.omim.org/entry/614124	GPCPD1	GPCPD1
100272	107360	FBgn0038013	CG10038	CG10038	Negative	-	Positive	No	Negative	Y		http://flybase.org/reports/FBgn0038013.html		FAM172A	FAM172BP, FAM172A
110063	106404	FBgn0038014	CG10041	CG10041	Negative	-	Positive	No	Negative	N		http://flybase.org/reports/FBgn0038014.html
102698	112210	FBgn0038087	beat-Va	CG10134	Negative	-	Positive	No	Negative			http://flybase.org/reports/FBgn0038087.html	http://www.omim.org/entry/605686
101051	106734	FBgn0038089	d-cup	CG14387	Negative	-	Positive	No	Negative		davis-cup [Acc:FBgn0038089]	http://flybase.org/reports/FBgn0038089.html		EFCAB1	EFCAB1
102183	111024	FBgn0038099	CG7091	CG7091	Negative	-	Positive	No	Negative			http://flybase.org/reports/FBgn0038099.html	https://www.omim.org/entry/182308	SLC17A4	SLC17A4, SLC17A2, SLC17A1, SLC17A3, SLC17A5
101087	106865	FBgn0038125	CG8141	CG8141	Negative	-	Positive	No	Negative			http://flybase.org/reports/FBgn0038125.html	http://www.omim.org/entry/602677	RNF5	RNF185, RNF5
104260	106425	FBgn0038135	CG8773	CG8773	Negative	-	Positive	No	Negative	N		http://flybase.org/reports/FBgn0038135.html	http://www.omim.org/entry/138297	ENPEP	ERAP1, ERAP2, LNPEP, ANPEP, ENPEP
105538	104500	FBgn0038151	yellow-e2	CG17044	Negative	-	Positive	No	Negative	Y		http://flybase.org/reports/FBgn0038151.html
100126	104817	FBgn0038166	CG9588	CG9588	Negative	-	Positive	No	Negative	N		http://flybase.org/reports/FBgn0038166.html	http://www.omim.org/entry/603146	PSMD9	PSMD9
101233	103974	FBgn0038198	Npc2b	CG3153	Negative	-	Positive	No	Negative	Y	Niemann-Pick type C-2b [Acc:FBgn0038198]	http://flybase.org/reports/FBgn0038198.html	http://www.omim.org/entry/601015	NPC2	NPC2
102835	105245	FBgn0038202	CG12402	CG12402	Negative	-	Positive	No	Negative	Y		http://flybase.org/reports/FBgn0038202.html	http://www.omim.org/entry/609083
103815	103474	FBgn0038203	Or88a	CG14360	Negative	-	Positive	No	Negative	N	Odorant receptor 88a [Acc:FBgn0038203]	http://flybase.org/reports/FBgn0038203.html
100504	104555	FBgn0038207	CG14356	CG14356	Negative	-	Positive	No	Negative	N		http://flybase.org/reports/FBgn0038207.html
107566	106392	FBgn0038213	CG9624	CG9624	Negative	-	Positive	No	Negative	Y		http://flybase.org/reports/FBgn0038213.html
101004	106567	FBgn0038261	CG14856	CG14856	Negative	-	Positive	No	Negative	Y		http://flybase.org/reports/FBgn0038261.html	https://www.omim.org/entry/611461	SLC22A17	SLC22A31, SLC22A23, SLC22A4, SLC22A5, SLC22A17
105549	104654	FBgn0038279	Sdr	CG3837	Negative	-	Positive	No	Negative	Y	Secreted decoy of InR [Acc:FBgn0038279]	http://flybase.org/reports/FBgn0038279.html	http://www.omim.org/entry/147370	IGF1R	INSR, INSRR, IGF1R
101009	106603	FBgn0038280	CG14861	CG14861	Negative	-	Positive	No	Negative			http://flybase.org/reports/FBgn0038280.html	http://www.omim.org/entry/616450	EFHD2	EFHD1, EFHD2
100416	104258	FBgn0038309	Amt	CG6499	Negative	-	Positive	No	Negative	Y	Ammonium transporter [Acc:FBgn0038309]	http://flybase.org/reports/FBgn0038309.html
109421	108196	FBgn0038332	CG6136	CG6136	Negative	-	Positive	No	Negative	N		http://flybase.org/reports/FBgn0038332.html	http://www.omim.org/entry/610101	CUTC	CUTC
105745	108872	FBgn0038363	Acyp2	CG18505	Negative	-	Positive	No	Negative	N	Acylphosphatase 2 [Acc:FBgn0038363]	http://flybase.org/reports/FBgn0038363.html	http://www.omim.org/entry/600875	ACYP1	ACYP2, ACYP1
101128	106998	FBgn0038404	CG8925	CG8925	Negative	-	Positive	No	Negative			http://flybase.org/reports/FBgn0038404.html	http://www.omim.org/entry/604048	SLC22A4	SLC22A4, SLC22A5
105916	106349	FBgn0038423	CG10317	CG10317	Negative	-	Positive	No	Negative	N		http://flybase.org/reports/FBgn0038423.html
101110	106931	FBgn0038448	CG12783	CG12783	Negative	-	Positive	No	Negative			http://flybase.org/reports/FBgn0038448.html	https://www.omim.org/entry/185861	SV2B	SV2B, SV2C
106115	112066	FBgn0038458	VhaM9.7-d	CG14909	Negative	-	Positive	No	Negative	Y	Vacuolar H[+] ATPase M9.7 subunit d [Acc:FBgn0038458]	http://flybase.org/reports/FBgn0038458.html	http://www.omim.org/entry/603931	ATP6V0E1	ATP6V0E2, ATP6V0E1
106653	108850	FBgn0038474	mRpS11	CG5184	Negative	-	Positive	No	Negative	N	mitochondrial ribosomal protein S11 [Acc:FBgn0038474]	http://flybase.org/reports/FBgn0038474.html	http://www.omim.org/entry/611977	MRPS11	MRPS11
102694	112201	FBgn0038533	CG7523	CG7523	Negative	-	Positive	No	Negative	N		http://flybase.org/reports/FBgn0038533.html		TMEM192	TMEM192
101922	110245	FBgn0038539	Atg8b	CG12334	Negative	-	Positive	No	Negative	N	Autophagy-related 8b [Acc:FBgn0038539]	http://flybase.org/reports/FBgn0038539.html	http://www.omim.org/entry/605125	GABARAP	GABARAPL2, GABARAPL1, GABARAP
110269	100094	FBgn0038569	CG7218	CG7218	Negative	-	Positive	No	Negative	Y		http://flybase.org/reports/FBgn0038569.html	http://www.omim.org/entry/612758	TAPT1	TAPT1
110235	100420	FBgn0038576	Arp5	CG7940	Negative	-	Positive	No	Negative	Y	Actin-related protein 5 [Acc:FBgn0038576]	http://flybase.org/reports/FBgn0038576.html		ACTR5	ACTR5
109461	103196	FBgn0038583	CG7183	CG7183	Negative	-	Positive	No	Negative	N		http://flybase.org/reports/FBgn0038583.html	http://www.omim.org/entry/616735	CCDC174	CCDC174
100227	107173	FBgn0038608	WRNexo	CG7670	Negative	-	Positive	No	Negative	Y	WRN exonuclease [Acc:FBgn0038608]	http://flybase.org/reports/FBgn0038608.html	http://www.omim.org/entry/604611	WRN	WRN
108995	107940	FBgn0038627	CG7694	CG7694	Negative	-	Positive	No	Negative	Y		http://flybase.org/reports/FBgn0038627.html	http://www.omim.org/entry/612490	RNF181	PJA2, PJA1, RNF181
107384	101207	FBgn0038660	CG14291	CG14291	Negative	-	Positive	No	Negative	Y		http://flybase.org/reports/FBgn0038660.html	http://www.omim.org/entry/605270	SGSH	SGSH
106881	111385	FBgn0038673	CG14286	CG14286	Negative	-	Positive	No	Negative	Y		http://flybase.org/reports/FBgn0038673.html		C8orf33	C8orf33
107224	104303	FBgn0038674	CG14285	CG14285	Negative	-	Positive	No	Negative	N		http://flybase.org/reports/FBgn0038674.html
108139	105906	FBgn0038676	CG6026	CG6026	Negative	-	Positive	No	Negative	Y		http://flybase.org/reports/FBgn0038676.html
104742	104061	FBgn0038706	CG3517	CG3517	Negative	-	Positive	No	Negative	Y		http://flybase.org/reports/FBgn0038706.html
108553	100664	FBgn0038773	CG10887	CG10887	Negative	-	Positive	No	Negative	N		http://flybase.org/reports/FBgn0038773.html	http://www.omim.org/entry/610507	LEO1	LEO1
101444	109182	FBgn0038808	Srp14	CG5417	Negative	-	Positive	No	Negative	N	Signal recognition particle protein 14 [Acc:FBgn0038808]	http://flybase.org/reports/FBgn0038808.html	http://omim.org/entry/600708	SRP14	SRP14
106210	103663	FBgn0038827	Fancd2	CG17269	Negative	-	Positive	No	Negative	N		http://flybase.org/reports/FBgn0038827.html	http://www.omim.org/entry/613984	FANCD2	FANCD2
110238	101340	FBgn0038868	CG5862	CG5862	Negative	-	Positive	No	Negative	N		http://flybase.org/reports/FBgn0038868.html	http://www.omim.org/entry/616177	DDRGK1	DDRGK1
106245	101005	FBgn0038872	Nelf-A	CG5874	Negative	-	Positive	No	Negative	N	Negative elongation factor A [Acc:FBgn0038872]	http://flybase.org/reports/FBgn0038872.html	http://www.omim.org/entry/606026	NELFA	NELFA
104947	112422	FBgn0038879	CG17298	CG17298	Negative	-	Positive	No	Negative	N		http://flybase.org/reports/FBgn0038879.html
102742	112325	FBgn0038888	CheB93a	CG15503	Negative	-	Positive	No	Negative		Chemosensory protein B 93a [Acc:FBgn0038888]	http://flybase.org/reports/FBgn0038888.html
101104	106920	FBgn0038918	CG6690	CG6690	Negative	-	Positive	No	Negative			http://flybase.org/reports/FBgn0038918.html	http://www.omim.org/entry/612860	QSOX2	QSOX1, QSOX2
100333	105956	FBgn0038928	Fadd	CG12297	Negative	-	Positive	No	Negative	Y	Fas-associated death domain [Acc:FBgn0038928]	http://flybase.org/reports/FBgn0038928.html	http://www.omim.org/entry/602457	FADD	FADD
106477	103426	FBgn0038944	CG5388	CG5388	Negative	-	Positive	No	Negative	N		http://flybase.org/reports/FBgn0038944.html
107919	106859	FBgn0038986	sit	CG5278	Negative	-	Positive	No	Negative	N	stuck in traffic [Acc:FBgn0038986]	http://flybase.org/reports/FBgn0038986.html	http://www.omim.org/entry/605512	ELOVL7	ELOVL5, ELOVL2, ELOVL4, ELOVL1, ELOVL7
100379	106106	FBgn0039024	CG4721	CG4721	Negative	-	Positive	No	Negative	Y		http://flybase.org/reports/FBgn0039024.html	http://www.omim.org/entry/613883	KEL	ECE2, ECE1, PHEX, MMEL1, ECEL1, MME, KEL
104457	107183	FBgn0039028	CG13840	CG13840	Negative	-	Positive	No	Negative	Y		http://flybase.org/reports/FBgn0039028.html
101046	106710	FBgn0039030	CG6660	CG6660	Negative	-	Positive	No	Negative	N		http://flybase.org/reports/FBgn0039030.html	http://www.omim.org/entry/614451	ELOVL7	ELOVL5, ELOVL4, ELOVL2, ELOVL1, ELOVL7
109869	111506	FBgn0039034	Or94b	CG6679	Negative	-	Positive	No	Negative		Odorant receptor 94b [Acc:FBgn0039034]	http://flybase.org/reports/FBgn0039034.html
103001	113065	FBgn0039044	p53	CG33336	Negative	-	Positive	No	Negative			http://flybase.org/reports/FBgn0039044.html	http://www.omim.org/entry/601990	TP73	TP53, TP73, TP63
108360	103421	FBgn0039049	CG6726	CG6726	Negative	-	Positive	No	Negative	N		http://flybase.org/reports/FBgn0039049.html	http://www.omim.org/entry/104620	ACY1	ABHD14A-ACY1, ACY1
108274	106012	FBgn0039071	bb8	CG4434	Negative	-	Positive	No	Negative	N	big bubble 8 [Acc:FBgn0039071]	http://flybase.org/reports/FBgn0039071.html	http://www.omim.org/entry/138130	GLUD1	GLUD2, GLUD1
107424	104060	FBgn0039086	CG16732	CG16732	Negative	-	Positive	No	Negative	Y		http://flybase.org/reports/FBgn0039086.html	http://www.omim.org/entry/606428	UGT2B10	UGT3A1, UGT3A2, UGT2A2, UGT8, UGT1A4, UGT1A7, UGT1A5, UGT1A9, UGT1A6, UGT1A1, UGT2B4, UGT2B15, UGT2B28, UGT1A3, UGT2B17, UGT2B11, UGT2A3, UGT2B7, UGT1A10, UGT1A8, UGT2B10
110257	106470	FBgn0039089	beat-IV	CG10152	Negative	-	Positive	No	Negative	N		http://flybase.org/reports/FBgn0039089.html
104414	108488	FBgn0039099	GILT2	CG10157	Negative	-	Positive	No	Negative	Y	Gamma-interferon-inducible lysosomal thiol reductase 2 [Acc:FBgn0039099]	http://flybase.org/reports/FBgn0039099.html	https://www.omim.org/entry/604664	IFI30	IFI30
104774	108325	FBgn0039111	PTPMT1	CG10371	Negative	-	Positive	No	Negative	N	Protein tyrosine phosphatase, mitochondrial 1 [Acc:FBgn0039111]	http://flybase.org/reports/FBgn0039111.html	http://www.omim.org/entry/609538	PTPMT1	PTPMT1
107400	109778	FBgn0039167	CG17786	CG17786	Negative	-	Positive	No	Negative	Y		http://flybase.org/reports/FBgn0039167.html
102800	112482	FBgn0039190	CG5762	CG5762	Negative	-	Positive	No	Negative	Y		http://flybase.org/reports/FBgn0039190.html
107262	101988	FBgn0039254	Nmnat	CG13645	Negative	-	Positive	No	Negative	Y	Nicotinamide mononucleotide adenylyltransferase [Acc:FBgn0039254]	http://flybase.org/reports/FBgn0039254.html	http://www.omim.org/entry/608700	NMNAT1	NMNAT2, NMNAT3, NMNAT1
100896	106167	FBgn0039264	CG11786	CG11786	Negative	-	Positive	No	Negative	Y		http://flybase.org/reports/FBgn0039264.html
110541	102780	FBgn0039291	CG13663	CG13663	Negative	-	Positive	No	Negative	N		http://flybase.org/reports/FBgn0039291.html		SAYSD1	SAYSD1
106737	106907	FBgn0039324	CG10553	CG10553	Negative	-	Positive	No	Negative			http://flybase.org/reports/FBgn0039324.html
107107	105009	FBgn0039355	CG4730	CG4730	Negative	-	Positive	No	Negative	N		http://flybase.org/reports/FBgn0039355.html
106471	102848	FBgn0039379	CG5886	CG5886	Negative	-	Positive	No	Negative	N		http://flybase.org/reports/FBgn0039379.html	http://www.omim.org/entry/608676	TXLNA	TXLNG, TXLNB, TXLNA
104809	109957	FBgn0039386	CG5948	CG5948	Negative	-	Positive	No	Negative	Y		http://flybase.org/reports/FBgn0039386.html	https://www.omim.org/entry/185490	SOD3	SOD3
102717	112259	FBgn0039428	CG14237	CG14237	Negative	-	Positive	No	Negative	Y		http://flybase.org/reports/FBgn0039428.html
104118	104116	FBgn0039430	CG5455	CG5455	Negative	-	Positive	No	Negative			http://flybase.org/reports/FBgn0039430.html	http://www.omim.org/entry/614725	SERAC1	SERAC1
101176	107034	FBgn0039443	TwdlS	CG14242	Negative	-	Positive	No	Negative	Y	TweedleS [Acc:FBgn0039443]	http://flybase.org/reports/FBgn0039443.html
102035	110478	FBgn0039472	CG17192	CG17192	Negative	-	Positive	No	Negative	Y		http://flybase.org/reports/FBgn0039472.html	http://www.omim.org/entry/607460
107430	106108	FBgn0039478	Nep5	CG6265	Negative	-	Positive	No	Negative	N	Neprilysin 5 [Acc:FBgn0039478]	http://flybase.org/reports/FBgn0039478.html	http://www.omim.org/entry/120520	MME	KEL, ECE2, ECE1, PHEX, MMEL1, ECEL1, MME
100107	103660	FBgn0039523	CG12885	CG12885	Negative	-	Positive	No	Negative	Y		http://flybase.org/reports/FBgn0039523.html
104368	107964	FBgn0039528	dsd	CG5634	Negative	-	Positive	No	Negative		distracted [Acc:FBgn0039528]	http://flybase.org/reports/FBgn0039528.html	http://www.omim.org/entry/603130	ATRN	ATRNL1, ATRN
102836	105253	FBgn0039568	CG4815	CG4815	Negative	-	Positive	No	Negative	N		http://flybase.org/reports/FBgn0039568.html
105129	101769	FBgn0039580	Gfat2	CG1345	Negative	-	Positive	No	Negative		Glutamine:fructose-6-phosphate aminotransferase 2 [Acc:FBgn0039580]	http://flybase.org/reports/FBgn0039580.html	http://www.omim.org/entry/603865	GFPT2	GFPT1, GFPT2
110352	100923	FBgn0039589	CG9986	CG9986	Negative	-	Positive	No	Negative	Y		http://flybase.org/reports/FBgn0039589.html		C12orf4	C12orf4
105531	104403	FBgn0039613	CG14527	CG14527	Negative	-	Positive	No	Negative	Y		http://flybase.org/reports/FBgn0039613.html	http://www.omim.org/entry/613883	KEL	ECE2, ECE1, PHEX, MMEL1, ECEL1, MME, KEL
104056	112589	FBgn0039617	DIP-gamma	CG14521	Negative	-	Positive	No	Negative	Y	Dpr-interacting protein gamma [Acc:FBgn0039617]	http://flybase.org/reports/FBgn0039617.html	http://www.omim.org/entry/600632	IGLON5	LSAMP, NEGR1, NTM, IGLON5, OPCML
101661	105366	FBgn0039634	alpha-Man-Ib	CG11874	Negative	-	Positive	No	Negative	N	alpha-Mannosidase class I b [Acc:FBgn0039634]	http://flybase.org/reports/FBgn0039634.html	http://www.omim.org/entry/604346	MAN1B1	MAN1C1, MAN1A2, MAN1A1, MAN1B1
103542	100884	FBgn0039690	Gnpnat	CG1969	Negative	-	Positive	No	Negative	N		http://flybase.org/reports/FBgn0039690.html	http://www.omim.org/entry/616510	GNPNAT1	GNPNAT1
101537	108991	FBgn0039726	eIF2Balpha	CG7883	Negative	-	Positive	No	Negative	N	eukaryotic translation initiation factor 2B subunit alpha [Acc:FBgn0039726]	http://flybase.org/reports/FBgn0039726.html	http://www.omim.org/entry/606686	EIF2B1	EIF2B1
106335	109440	FBgn0039734	Tace	CG7908	Negative	-	Positive	No	Negative	N		http://flybase.org/reports/FBgn0039734.html	https://www.omim.org/entry/603639	ADAM17	ADAM17
102725	112278	FBgn0039739	RpS28a	CG15527	Negative	-	Positive	No	Negative	Y	Ribosomal protein S28a [Acc:FBgn0039739]	http://flybase.org/reports/FBgn0039739.html	http://www.omim.org/entry/603685	RPS28	RPS28
100307	107897	FBgn0039743	CG7946	CG7946	Negative	-	Positive	No	Negative	Y		http://flybase.org/reports/FBgn0039743.html	https://www.omim.org/entry/603620	PSIP1	HDGFL1, HDGFL3, HDGFL2, HDGF, PSIP1
106391	111080	FBgn0039760	CG9682	CG9682	Negative	-	Positive	No	Negative	Y		http://flybase.org/reports/FBgn0039760.html
105007	112787	FBgn0039761	CG18404	CG18404	Negative	-	Positive	No	Negative	Y		http://flybase.org/reports/FBgn0039761.html
101953	110318	FBgn0039808	CG12071	CG12071	Negative	-	Positive	No	Negative	N		http://flybase.org/reports/FBgn0039808.html
109807	108173	FBgn0039835	mRpL32	CG12220	Negative	-	Positive	No	Negative	Y	mitochondrial ribosomal protein L32 [Acc:FBgn0039835]	http://flybase.org/reports/FBgn0039835.html	http://www.omim.org/entry/611839	MRPL32	MRPL32
104497	109382	FBgn0039859	CG11539	CG11539	Negative	-	Positive	No	Negative	N		http://flybase.org/reports/FBgn0039859.html		NAT9	NAT9
110398	101355	FBgn0039877	Mccc1	CG2118	Negative	-	Positive	No	Negative	Y		http://flybase.org/reports/FBgn0039877.html	http://www.omim.org/entry/609010	MCCC1	PCCA, MCCC1
105111	101341	FBgn0039928	Cals	CG11059	Negative	-	Positive	No	Negative		Calsyntenin-1 [Acc:FBgn0039928]	http://flybase.org/reports/FBgn0039928.html	http://www.omim.org/entry/611323	CLSTN2	CLSTN3, CLSTN1, CLSTN2
109973	115052	FBgn0040009	CG17490	CG17490	Negative	-	Positive	No	Negative	Y		http://flybase.org/reports/FBgn0040009.html
109083	115490	FBgn0040038	klhl10	CG12423	Negative	-	Positive	No	Negative	Y	kelch like family member 10 [Acc:FBgn0040038]	http://flybase.org/reports/FBgn0040038.html	http://www.omim.org/entry/608778	KLHL10	KLHL10
107218	104111	FBgn0040097	lectin-30A	CG17011	Negative	-	Positive	No	Negative	Y		http://flybase.org/reports/FBgn0040097.html	http://www.omim.org/entry/187520
105139	102026	FBgn0040324	Ephrin	CG1862	Negative	-	Positive	No	Negative	N		http://flybase.org/reports/FBgn0040324.html	http://www.omim.org/entry/600527	EFNB1	EFNA5, EFNA1, EFNA2, EFNA4, EFNA3, EFNB3, EFNB2, EFNB1
102154	110940	FBgn0040370	CG13375	CG13375	Negative	-	Positive	No	Negative	Y		http://flybase.org/reports/FBgn0040370.html	http://www.omim.org/entry/605550	RASD1	RASD2, RASD1
110662	100579	FBgn0040372	G9a	CG2995	Negative	-	Positive	No	Negative	Y		http://flybase.org/reports/FBgn0040372.html	http://www.omim.org/entry/604599	EHMT2	SUV39H2, SUV39H1, EHMT2, EHMT1
109357	114961	FBgn0040487	BobA	CG12487	Negative	-	Positive	No	Negative	N	Brother of Bearded A [Acc:FBgn0040487]	http://flybase.org/reports/FBgn0040487.html
104248	106308	FBgn0040509	ACXB	CG17174	Negative	-	Positive	No	Negative	Y		http://flybase.org/reports/FBgn0040509.html	http://www.omim.org/entry/103071	ADCY2	ADCY4, ADCY7, ADCY2
104639	111568	FBgn0040524	CG11052	CG11052	Negative	-	Positive	No	Negative	Y		http://flybase.org/reports/FBgn0040524.html	http://www.omim.org/entry/600875	ACYP1	ACYP2, ACYP1
106883	111405	FBgn0040571	CG17193	CG17193	Negative	-	Positive	No	Negative	Y		http://flybase.org/reports/FBgn0040571.html
103660	111109	FBgn0040602	CG14545	CG14545	Negative	-	Positive	No	Negative			http://flybase.org/reports/FBgn0040602.html
103659	111064	FBgn0040648	CG11666	CG11666	Negative	-	Positive	No	Negative	Y		http://flybase.org/reports/FBgn0040648.html
102708	112243	FBgn0040715	CG15386	CG15386	Negative	-	Positive	No	Negative	N		http://flybase.org/reports/FBgn0040715.html
103504	112305	FBgn0040732	CG16926	CG16926	Negative	-	Positive	No	Negative	N		http://flybase.org/reports/FBgn0040732.html
109693	103312	FBgn0040816	CG12521	CG12521	Negative	-	Positive	No	Negative	Y		http://flybase.org/reports/FBgn0040816.html
103049	111904	FBgn0040828	CG13306	CG13306	Negative	-	Positive	No	Negative	N		http://flybase.org/reports/FBgn0040828.html
101931	110271	FBgn0040906	CG15579	CG15579	Negative	-	Positive	No	Negative	Y		http://flybase.org/reports/FBgn0040906.html
101973	110381	FBgn0040963	CG18662	CG18662	Negative	-	Positive	No	Negative	Y		http://flybase.org/reports/FBgn0040963.html	http://www.omim.org/entry/610167	PHPT1	PHPT1
100544	106840	FBgn0040968	CG14933	CG14933	Negative	-	Positive	No	Negative			http://flybase.org/reports/FBgn0040968.html
100304	107886	FBgn0041588	eIF2D	CG31426	Negative	-	Positive	No	Negative	N	eukaryotic translation initiation factor 2D [Acc:FBgn0041588]	http://flybase.org/reports/FBgn0041588.html	https://www.omim.org/entry/613709	EIF2D	EIF2D
106432	112773	FBgn0041623	Or65c	CG32403	Negative	-	Positive	No	Negative	Y	Odorant receptor 65c [Acc:FBgn0041623]	http://flybase.org/reports/FBgn0041623.html
101699	105494	FBgn0041625	Or65a	CG32401	Negative	-	Positive	No	Negative	Y	Odorant receptor 65a [Acc:FBgn0041625]	http://flybase.org/reports/FBgn0041625
100926	106243	FBgn0041711	yellow-e	CG9792	Negative	-	Positive	No	Negative			http://flybase.org/reports/FBgn0041711.html
110272	100145	FBgn0042134	Capr	CG18811	Negative	-	Positive	No	Negative		Caprin [Acc:FBgn0042134]	http://flybase.org/reports/FBgn0042134.html	http://www.omim.org/entry/601178	CAPRIN1	CAPRIN2, CAPRIN1
106349	109783	FBgn0042137	CG18814	CG18814	Negative	-	Positive	No	Negative	Y		http://flybase.org/reports/FBgn0042137.html	http://www.omim.org/entry/601688	HPGD	HPGD
102529	111899	FBgn0042189	CG17376	CG17376	Negative	-	Positive	No	Negative			http://flybase.org/reports/FBgn0042189.html
107494	111265	FBgn0042205	CG18764	CG18764	Negative	-	Positive	No	Negative	N		http://flybase.org/reports/FBgn0042205.html	http://www.omim.org/entry/605467	ZNF274	ZNF274
107494	111265	FBgn0042205	CG18764	CG18764	Negative	-	Positive	No	Negative	Y		http://flybase.org/reports/FBgn0042205.html	http://www.omim.org/entry/605467	ZNF274	ZNF274
105855	106426	FBgn0042627	FASN2	CG3524	Negative	-	Positive	No	Negative	N	Fatty acid synthase 2 [Acc:FBgn0042627]	http://flybase.org/reports/FBgn0042627.html	http://www.omim.org/entry/600212	FASN	FASN
102114	110782	FBgn0043471	kappaTry	CG12388	Negative	-	Positive	No	Negative			http://flybase.org/reports/FBgn0043471.html
107221	104186	FBgn0043796	CG12219	CG12219	Negative	-	Positive	No	Negative	Y		http://flybase.org/reports/FBgn0043796.html
108267	105212	FBgn0043865	SA-2	CG13916	Negative	-	Positive	No	Negative	N	Stromalin-2 [Acc:FBgn0043865]	http://flybase.org/reports/FBgn0043865.html	https://www.omim.org/entry/604358	STAG3	STAG3, STAG1, STAG2
103411	100529	FBgn0043884	mask	CG33106	Negative	-	Positive	No	Negative		multiple ankyrin repeats single KH domain [Acc:FBgn0043884]	http://flybase.org/reports/FBgn0043884.html	http://www.omim.org/entry/615929	ANKRD17	ANKHD1-EIF4EBP3, ANKRD17
100629	108830	FBgn0044020	Roc2	CG8998	Negative	-	Positive	No	Negative	Y	Regulator of cullins 2 [Acc:FBgn0044020]	http://flybase.org/reports/FBgn0044020.html	http://www.omim.org/entry/603863	RNF7	RBX1, RNF7
100514	104696	FBgn0044810	TotX	CG31193	Negative	-	Positive	No	Negative	Y	Turandot X [Acc:FBgn0044810]	http://flybase.org/reports/FBgn0044810.html
109155	115939	FBgn0044817	Ste12DOR	CG32616	Negative	-	Positive	No	Negative	Y	Stellate 12D orphon [Acc:FBgn0044817]	http://flybase.org/reports/FBgn0044817.html	http://www.omim.org/entry/115441	CSNK2B	CSNK2B
101366	108687	FBgn0045064	bwa	CG13969	Negative	-	Positive	No	Negative	N	brain washing [Acc:FBgn0045064]	http://flybase.org/reports/FBgn0045064.html	http://www.omim.org/entry/613492	ACER2	ACER3, ACER1, ACER2
105546	104630	FBgn0045442	mthl12	CG32853	Negative	-	Positive	No	Negative	N	methuselah-like 12 [Acc:FBgn0045442]	http://flybase.org/reports/FBgn0045442.html
108029	105862	FBgn0045468	Gr93d	CG31335	Negative	-	Positive	No	Negative		Gustatory receptor 93d [Acc:FBgn0045468]	http://flybase.org/reports/FBgn0045468.html
107792	103513	FBgn0045500	Gr22b	CG31931	Negative	-	Positive	No	Negative	Y	Gustatory receptor 22b [Acc:FBgn0045500]	http://flybase.org/reports/FBgn0045500.html
105787	110738	FBgn0045770	S-Lap3	CG32063	Negative	-	Positive	No	Negative	Y	Sperm-Leucylaminopeptidase 3 [Acc:FBgn0045770]	http://flybase.org/reports/FBgn0045770.html	http://www.omim.org/entry/170250	LAP3	LAP3
105783	110416	FBgn0045827	CG13245	CG13245	Negative	-	Positive	No	Negative	N		http://flybase.org/reports/FBgn0045827.html
106407	111730	FBgn0046258	CG12880	CG12880	Negative	-	Positive	No	Negative	N		http://flybase.org/reports/FBgn0046258.html
106079	106596	FBgn0046885	Gr98d	CG31061	Negative	-	Positive	No	Negative		Gustatory receptor 98d [Acc:FBgn0046885]	http://flybase.org/reports/FBgn0046885.html
100111	103685	FBgn0047330	CG32235	CG32235	Negative	-	Positive	No	Negative	N		http://flybase.org/reports/FBgn0047330.html
101955	110320	FBgn0050005	GstT2	CG30005	Negative	-	Positive	No	Negative	N	Glutathione S transferase T2 [Acc:FBgn0050005]	http://flybase.org/reports/FBgn0050005.html		GSTT2	GSTT2B, GSTT1, GSTT2
102817	103887	FBgn0050008	CG30008	CG30008	Negative	-	Positive	No	Negative	Y		http://flybase.org/reports/FBgn0050008.html	https://www.omim.org/entry/614451	ELOVL7	ELOVL1, ELOVL7
107051	102165	FBgn0050011	gem	CG30011	Negative	-	Positive	No	Negative		gemini [Acc:FBgn0050011]	http://flybase.org/reports/FBgn0050011.html	http://www.omim.org/entry/189889	TFCP2	UBP1, TFCP2L1, TFCP2
102279	111415	FBgn0050033	CG30033	CG30033	Negative	-	Positive	No	Negative	Y		http://flybase.org/reports/FBgn0050033.html
106871	110587	FBgn0050044	s-cup	CG30044	Negative	-	Positive	No	Negative	N	stanley-cup [Acc:FBgn0050044]	http://flybase.org/reports/FBgn0050044.html
100371	106088	FBgn0050047	CG30047	CG30047	Negative	-	Positive	No	Negative	N		http://flybase.org/reports/FBgn0050047.html	http://www.omim.org/entry/611156	ERMP1	ERMP1
106412	111807	FBgn0050088	CG30088	CG30088	Negative	-	Positive	No	Negative	Y		http://flybase.org/reports/FBgn0050088.html
101240	103997	FBgn0050091	CG30091	CG30091	Negative	-	Positive	No	Negative	Y		http://flybase.org/reports/FBgn0050091.html
104593	110701	FBgn0050181	ppk3	CG30181	Negative	-	Positive	No	Negative	N	pickpocket 3 [Acc:FBgn0050181]	http://flybase.org/reports/FBgn0050181.html	https://www.omim.org/entry/611741	ASIC3	ASIC3, ASIC2, ASIC1, ASIC5, ASIC4
107441	107033	FBgn0050183	CG30183	CG30183	Negative	-	Positive	No	Negative	Y		http://flybase.org/reports/FBgn0050183.html	http://www.omim.org/entry/616027
107933	111418	FBgn0050195	CG30195	CG30195	Negative	-	Positive	No	Negative	Y		http://flybase.org/reports/FBgn0050195.html
102808	112497	FBgn0050197	CG30197	CG30197	Negative	-	Positive	No	Negative	Y		http://flybase.org/reports/FBgn0050197.html
101626	105252	FBgn0050268	CG30268	CG30268	Negative	-	Positive	No	Negative	Y		http://flybase.org/reports/FBgn0050268.html		CFAP61	CFAP61
104269	106550	FBgn0050288	CG30288	CG30288	Negative	-	Positive	No	Negative	Y		http://flybase.org/reports/FBgn0050288.html
100275	107390	FBgn0050410	Rpi	CG30410	Negative	-	Positive	No	Negative	N	Ribose-5-phosphate isomerase [Acc:FBgn0050410]	http://flybase.org/reports/FBgn0050410.html	http://www.omim.org/entry/180430	RPIA	RPIA
102034	110464	FBgn0050413	CG30413	CG30413	Negative	-	Positive	No	Negative	N		http://flybase.org/reports/FBgn0050413.html
107378	107060	FBgn0050417	tbrd-3	CG30417	Negative	-	Positive	No	Negative	Y	testis-specifically expressed bromodomain containing protein-3 [Acc:FBgn0050417]	http://flybase.org/reports/FBgn0050417.html	http://www.omim.org/entry/608749	BRD4	BRD4, BRD2, BRD3, BRDT
103553	101035	FBgn0050421	Usp15-31	CG30421	Negative	-	Positive	No	Negative	Y	Ubiquitin specific protease 15/31 [Acc:FBgn0050421]	http://flybase.org/reports/FBgn0050421.html		USP31	USP43, USP31
106411	111806	FBgn0050423	CG30423	CG30423	Negative	-	Positive	No	Negative	Y		http://flybase.org/reports/FBgn0050423.html	http://www.omim.org/entry/613461	LEPROT	LEPROTL1, LEPROT
110045	104307	FBgn0050443	Opbp	CG30443	Negative	-	Positive	No	Negative	N	Optix-binding protein [Acc:FBgn0050443]	http://flybase.org/reports/FBgn0050443.html
108777	112061	FBgn0050472	CG30472	CG30472	Negative	-	Positive	No	Negative			http://flybase.org/reports/FBgn0050472.html
100362	106064	FBgn0051028	CG31028	CG31028	Negative	-	Positive	No	Negative	Y		http://flybase.org/reports/FBgn0051028.html
107398	106825	FBgn0051030	CG31030	CG31030	Negative	-	Positive	No	Negative			http://flybase.org/reports/FBgn0051030.html	http://www.omim.org/entry/300197	ATP6AP1L	ATP6AP1L, ATP6AP1
106359	110090	FBgn0051055	CG31055	CG31055	Negative	-	Positive	No	Negative	N		http://flybase.org/reports/FBgn0051055.html
108098	101558	FBgn0051119	HDAC11	CG31119	Negative	-	Positive	No	Negative	Y	Histone deacetylase 11 [Acc:FBgn0051119]	http://flybase.org/reports/FBgn0051119.html	http://www.omim.org/entry/607226	HDAC11	HDAC11
102665	105064	FBgn0051139	CG31139	CG31139	Negative	-	Positive	No	Negative	Y		http://flybase.org/reports/FBgn0051139.html	https://www.omim.org/entry/615618	POGLUT1	KDELC2, KDELC1, POGLUT1
104209	104381	FBgn0051146	Nlg1	CG31146	Negative	-	Positive	No	Negative	N	Neuroligin 1 [Acc:FBgn0051146]	http://flybase.org/reports/FBgn0051146.html	http://www.omim.org/entry/600568	NLGN4X	CEL, NLGN2, NLGN4X, NLGN1, NLGN3, NLGN4Y
104743	104065	FBgn0051195	CG31195	CG31195	Negative	-	Positive	No	Negative	Y		http://flybase.org/reports/FBgn0051195.html	http://www.omim.org/entry/614573
107738	106388	FBgn0051198	CG31198	CG31198	Negative	-	Positive	No	Negative			http://flybase.org/reports/FBgn0051198.html	http://www.omim.org/entry/151530	ANPEP	ENPEP, NPEPPS, ERAP1, ERAP2, TRHDE, LVRN, ANPEP
109700	103464	FBgn0051202	alpha-Man-Ic	CG31202	Negative	-	Positive	No	Negative	N	alpha-Mannosidase class I c [Acc:FBgn0051202]	http://flybase.org/reports/FBgn0051202.html	http://www.omim.org/entry/604345	MAN1A2	MAN1A1, MAN1C1, MAN1A2
103017	113111	FBgn0051221	CG31221	CG31221	Negative	-	Positive	No	Negative	Y		http://flybase.org/reports/FBgn0051221.html
108763	111204	FBgn0051360	CG31360	CG31360	Negative	-	Positive	No	Negative			http://flybase.org/reports/FBgn0051360.html
100445	104354	FBgn0051410	Npc2e	CG31410	Negative	-	Positive	No	Negative	Y	Niemann-Pick type C-2e [Acc:FBgn0051410]	http://flybase.org/reports/FBgn0051410.html	http://www.omim.org/entry/601015	NPC2	NPC2
100427	104286	FBgn0051427	CR31427	CR31427	Negative	-	Positive	No	Negative	Y		http://flybase.org/reports/FBgn0051427.html
108890	104209	FBgn0051437	CG31437	CG31437	Negative	-	Positive	No	Negative	N		http://flybase.org/reports/FBgn0051437.html
101730	108175	FBgn0051482	CG31482	CG31482	Negative	-	Positive	No	Negative	Y		http://flybase.org/reports/FBgn0051482.html	http://www.omim.org/entry/607141	GLIPR2	CRISPLD2, CRISPLD1, GLIPR2
101010	106536	FBgn0051510	CG31510	CG31510	Negative	-	Positive	No	Negative	Y		http://flybase.org/reports/FBgn0051510.html
102731	112293	FBgn0051526	lncRNA:CR31526	CR31526	Negative	-	Positive	No	Negative	N		http://flybase.org/reports/FBgn0051526.html
109886	102987	FBgn0051528	CG31528	CG31528	Negative	-	Positive	No	Negative			http://flybase.org/reports/FBgn0051528.html	http://www.omim.org/entry/605046	UBQLN4	UBQLN3, UBQLN4, UBQLN2, UBQLNL, UBQLN1
105190	112140	FBgn0051609	CG31609	CG31609	Negative	-	Positive	No	Negative	Y		http://flybase.org/reports/FBgn0051609.html	https://www.omim.org/entry/600033	TFPI2	TFPI2, TFPI
103022	113127	FBgn0051659	CG31659	CG31659	Negative	-	Positive	No	Negative	N		http://flybase.org/reports/FBgn0051659.html	http://www.omim.org/entry/107740	APOD	APOD
102131	110866	FBgn0051710	CG31710	CG31710	Negative	-	Positive	No	Negative			http://flybase.org/reports/FBgn0051710.html
102865	105647	FBgn0051720	mthl15	CG31720	Negative	-	Positive	No	Negative	N	methuselah-like 15 [Acc:FBgn0051720]	http://flybase.org/reports/FBgn0051720.html
101138	103938	FBgn0051774	fred	CG31774	Negative	-	Positive	No	Negative	Y	friend of echinoid [Acc:FBgn0051774]	http://flybase.org/reports/FBgn0051774.html
104195	104200	FBgn0051797	CG31797	CG31797	Negative	-	Positive	No	Negative	N		http://flybase.org/reports/FBgn0051797.html
100103	103651	FBgn0051805	CG31805	CG31805	Negative	-	Positive	No	Negative			http://flybase.org/reports/FBgn0051805.html
104306	107252	FBgn0051851	Naa20B	CG31851	Negative	-	Positive	No	Negative	Y	N(alpha)-acetyltransferase 20 B [Acc:FBgn0051851]	http://flybase.org/reports/FBgn0051851.html	http://www.omim.org/entry/610833	NAA20	NAA20
103398	100432	FBgn0051860	ZnT33D	CG31860	Negative	-	Positive	No	Negative		Zinc transporter 33D [Acc:FBgn0051860]	http://flybase.org/reports/FBgn0051860.html	http://www.omim.org/entry/602878	SLC30A2	SLC30A4, SLC30A8, SLC30A3, SLC30A2
102631	103373	FBgn0051974	CG31974	CG31974	Negative	-	Positive	No	Negative	Y		http://flybase.org/reports/FBgn0051974.html
100506	104574	FBgn0052022	CG32022	CG32022	Negative	-	Positive	No	Negative	N		http://flybase.org/reports/FBgn0052022.html	https://www.omim.org/entry/602915	WRB	WRB
110374	101045	FBgn0052082	IRSp53	CG32082	Negative	-	Positive	No	Negative		Insulin receptor substrate 53 kDa [Acc:FBgn0052082]	http://flybase.org/reports/FBgn0052082.html	http://www.omim.org/entry/605475	BAIAP2	BAIAP2L2, BAIAP2L1, BAIAP2
107634	104138	FBgn0052110	CG32110	CG32110	Negative	-	Positive	No	Negative			http://flybase.org/reports/FBgn0052110.html	http://www.omim.org/entry/608261	SENP1	SENP5, SENP3, SENP2, SENP1
100688	107501	FBgn0052190	NUCB1	CG32190	Negative	-	Positive	No	Negative	Y		http://flybase.org/reports/FBgn0052190.html	http://www.omim.org/entry/608020	NUCB2	NUCB1, NUCB2
107932	111334	FBgn0052192	CG32192	CG32192	Negative	-	Positive	No	Negative	Y		http://flybase.org/reports/FBgn0052192.html
101791	109648	FBgn0052196	CG32196	CG32196	Negative	-	Positive	No	Negative			http://flybase.org/reports/FBgn0052196.html	http://www.omim.org/entry/137170	GGCT	GGCT
109628	101627	FBgn0052238	TTLL1B	CG32238	Negative	-	Positive	No	Negative	Y		http://flybase.org/reports/FBgn0052238.html	http://www.omim.org/entry/608955	TTLL1	TTLL5, TTLL9, TTLL1
108323	105713	FBgn0052250	PMP34	CG32250	Negative	-	Positive	No	Negative	Y	Peroxisomal Membrane Protein 34 [Acc:FBgn0052250]	http://flybase.org/reports/FBgn0052250.html	http://www.omim.org/entry/606795	SLC25A17	SLC25A17
100156	105084	FBgn0052255	Gr64f	CG32255	Negative	-	Positive	No	Negative		Gustatory receptor 64f [Acc:FBgn0052255]	http://flybase.org/reports/FBgn0052255.html
106895	112437	FBgn0052266	CG32266	CG32266	Negative	-	Positive	No	Negative	N		http://flybase.org/reports/FBgn0052266.html
103505	112350	FBgn0052282	Drsl4	CG32282	Negative	-	Positive	No	Negative	Y	Drosomycin-like 4 [Acc:FBgn0052282]	http://flybase.org/reports/FBgn0052282.html
105013	112855	FBgn0052283	Drsl3	CG32283	Negative	-	Positive	No	Negative	N	Drosomycin-like 3 [Acc:FBgn0052283]	http://flybase.org/reports/FBgn0052283.html
100303	107674	FBgn0052333	CG32333	CG32333	Negative	-	Positive	No	Negative			http://flybase.org/reports/FBgn0052333.html		FAM135A	FAM135A, FAM135B
104385	108127	FBgn0052343	Atac3	CG32343	Negative	-	Positive	No	Negative	Y	Ada2a-containing complex component 3 [Acc:FBgn0052343]	http://flybase.org/reports/FBgn0052343.html		GABPB2	GABPB1, GABPB2
107316	108564	FBgn0052351	S-Lap2	CG32351	Negative	-	Positive	No	Negative	Y	Sperm-Leucylaminopeptidase 2 [Acc:FBgn0052351]	http://flybase.org/reports/FBgn0052351.html	http://omim.org/entry/170250	LAP3	LAP3
101917	110233	FBgn0052376	CG32376	CG32376	Negative	-	Positive	No	Negative	Y		http://flybase.org/reports/FBgn0052376.html
102827	104001	FBgn0052441	CG32441	CG32441	Negative	-	Positive	No	Negative	Y		http://flybase.org/reports/FBgn0052441.html	http://www.omim.org/entry/614545	EMC10	EMC10
110002	115701	FBgn0052521	CG32521	CG32521	Negative	-	Positive	No	Negative			http://flybase.org/reports/FBgn0052521.html
105356	102567	FBgn0052528	parvin	CG32528	Negative	-	Positive	No	Negative			http://flybase.org/reports/FBgn0052528.html	http://www.omim.org/entry/608121	PARVB	PARVG, PARVA, PARVB
104969	112602	FBgn0052548	CG32548	CG32548	Negative	-	Positive	No	Negative	N		http://flybase.org/reports/FBgn0052548.html
103317	112878	FBgn0052568	CG32568	CG32568	Negative	-	Positive	No	Negative	N		http://flybase.org/reports/FBgn0052568.html	https://www.omim.org/entry/601647	PPP2R5E	PPP2R5C, PPP2R5D, PPP2R5B, PPP2R5E
101061	106755	FBgn0052572	CG32572	CG32572	Negative	-	Positive	No	Negative			http://flybase.org/reports/FBgn0052572.html
109386	116174	FBgn0052598	betaNACtes6	CG32598	Negative	-	Positive	No	Negative	Y	Nascent-associated complex beta-subunit-like, testis 6 [Acc:FBgn0052598]	http://flybase.org/reports/FBgn0052598.html	http://www.omim.org/entry/602542
101069	106780	FBgn0052643	CG32643	CG32643	Negative	-	Positive	No	Negative	N		http://flybase.org/reports/FBgn0052643.html
109827	109777	FBgn0052650	CG32650	CG32650	Negative	-	Positive	No	Negative			http://flybase.org/reports/FBgn0052650.html
104127	104166	FBgn0052651	CG32651	CG32651	Negative	-	Positive	No	Negative			http://flybase.org/reports/FBgn0052651.html
102682	112144	FBgn0052726	CG32726	CG32726	Negative	-	Positive	No	Negative	N		http://flybase.org/reports/FBgn0052726.html
102996	113045	FBgn0052832	CG32832	CG32832	Negative	-	Positive	No	Negative	N		http://flybase.org/reports/FBgn0052832.html	http://www.omim.org/entry/614737	MPC2	MPC2
106854	109576	FBgn0052984	CG32984	CG32984	Negative	-	Positive	No	Negative	Y		http://flybase.org/reports/FBgn0052984.html
101024	106598	FBgn0053056	CG33056	CG33056	Negative	-	Positive	No	Negative	N		http://flybase.org/reports/FBgn0053056.html	http://www.omim.org/entry/614393	OARD1	OARD1
104875	107811	FBgn0053096	CG33096	CG33096	Negative	-	Positive	No	Negative			http://flybase.org/reports/FBgn0053096.html		ABHD17C	ABHD17A, ABHD17B, ABHD17C
104256	106389	FBgn0053145	GalT1	CG33145	Negative	-	Positive	No	Negative	Y	beta1,3-galactosyltransferase 1 [Acc:FBgn0053145]	http://flybase.org/reports/FBgn0053145.html	http://www.omim.org/entry/603093	B3GALT1	B3GNT4, B3GALNT1, B3GALT5, B3GALT2, B3GALT1
103902	114677	FBgn0053156	CG33156	CG33156	Negative	-	Positive	No	Negative	N		http://flybase.org/reports/FBgn0053156.html	http://www.omim.org/entry/611616	NADK	NADK
107557	106017	FBgn0053160	CG33160	CG33160	Negative	-	Positive	No	Negative	N		http://flybase.org/reports/FBgn0053160.html
101323	107562	FBgn0053193	sav	CG33193	Negative	-	Positive	No	Negative	Y	salvador [Acc:FBgn0053193]	http://flybase.org/reports/FBgn0053193.html	http://www.omim.org/entry/607203	SAV1	SAV1
106782	110125	FBgn0053223	CG33223	CG33223	Negative	-	Positive	No	Negative	N		http://flybase.org/reports/FBgn0053223.html
105318	110786	FBgn0053258	CG33258	CG33258	Negative	-	Positive	No	Negative	N		http://flybase.org/reports/FBgn0053258.html
100905	106191	FBgn0053263	CG33263	CG33263	Negative	-	Positive	No	Negative	N		http://flybase.org/reports/FBgn0053263.html
108718	106914	FBgn0053288	CG33288	CG33288	Negative	-	Positive	No	Negative	N		http://flybase.org/reports/FBgn0053288.html	http://www.omim.org/entry/312610	RPGR	RPGR
108716	106726	FBgn0053301	CG33301	CG33301	Negative	-	Positive	No	Negative	Y		http://flybase.org/reports/FBgn0053301.html
101986	110453	FBgn0053339	CG33339	CG33339	Negative	-	Positive	No	Negative	Y		http://flybase.org/reports/FBgn0053339.html
106291	105771	FBgn0053341	CG33341	CG33341	Negative	-	Positive	No	Negative	Y		http://flybase.org/reports/FBgn0053341.html
100352	106030	FBgn0053346	CG33346	CG33346	Negative	-	Positive	No	Negative	N		http://flybase.org/reports/FBgn0053346.html	http://www.omim.org/entry/600440
101808	109736	FBgn0053349	ppk25	CG33349	Negative	-	Positive	No	Negative	Y	pickpocket 25 [Acc:FBgn0053349]	http://flybase.org/reports/FBgn0053349.html	http://www.omim.org/entry/606715	ASIC4	ASIC3, ASIC1, ASIC2, ASIC5, ASIC4
102875	107108	FBgn0053474	CG33474	CG33474	Negative	-	Positive	No	Negative	N		http://flybase.org/reports/FBgn0053474.html	http://www.omim.org/entry/607583	PEX11G	PEX11G
102999	113058	FBgn0053493	CG33493	CG33493	Negative	-	Positive	No	Negative	N		http://flybase.org/reports/FBgn0053493.html
104105	104032	FBgn0053630	CG33630	CG33630	Negative	-	Positive	No	Negative	N		http://flybase.org/reports/FBgn0053630.html
110055	105847	FBgn0053653	Cadps	CG33653	Negative	-	Positive	No	Negative	Y	Calcium-dependent secretion activator [Acc:FBgn0053653]	http://flybase.org/reports/FBgn0053653.html	http://www.omim.org/entry/604667	CADPS	CADPS2, CADPS
103015	113102	FBgn0053798	CG33798	CG33798	Negative	-	Positive	No	Negative			http://flybase.org/reports/FBgn0053798.html
104919	112166	FBgn0053923	CG33923	CG33923	Negative	-	Positive	No	Negative	N		http://flybase.org/reports/FBgn0053923.html
102754	112351	FBgn0053993	CG33993	CG33993	Negative	-	Positive	No	Negative	N		http://flybase.org/reports/FBgn0053993.html
108823	113966	FBgn0054034	CG34034	CG34034	Negative	-	Positive	No	Negative	N		http://flybase.org/reports/FBgn0054034.html
103005	113072	FBgn0054041	CG34041	CG34041	Negative	-	Positive	No	Negative	Y		http://flybase.org/reports/FBgn0054041.html	https://www.omim.org/entry/176710
109559	115684	FBgn0058160	CG40160	CG40160	Negative	-	Positive	No	Negative	Y		http://flybase.org/reports/FBgn0058160.html	http://www.omim.org/entry/147910
109970	114990	FBgn0063923	Kaz1-ORFB	CG1220	Negative	-	Positive	No	Negative	Y		http://flybase.org/reports/FBgn0063923.html
107741	106798	FBgn0065109	ppk11	CG34058	Negative	-	Positive	No	Negative	N	pickpocket 11 [Acc:FBgn0065109]	http://flybase.org/reports/FBgn0065109.html	http://www.omim.org/entry/600760	ASIC1	ASIC3, ASIC2, ASIC5, ASIC1, ASIC4
106364	110259	FBgn0066101	LpR1	CG31094	Negative	-	Positive	No	Negative	Y	Lipophorin receptor 1 [Acc:FBgn0066101]	http://flybase.org/reports/FBgn0066101.html	http://www.omim.org/entry/192977	VLDLR	LDLR, LRP8, VLDLR
103796	112377	FBgn0066293	CheB42b	CG33351	Negative	-	Positive	No	Negative	N	Chemosensory protein B 42b [Acc:FBgn0066293]	http://flybase.org/reports/FBgn0066293.html
102384	110246	FBgn0069056	CG33226	CG33226	Negative	-	Positive	No	Negative	Y		http://flybase.org/reports/FBgn0069056.html
103752	102430	FBgn0069913	CG4681	CG4681	Negative	-	Positive	No	Negative	Y		http://flybase.org/reports/FBgn0069913.html		TEX9	TEX9
109038	115276	FBgn0083936	Acp54A1	CG34098	Negative	-	Positive	No	Negative	N	Accessory gland protein 54A1 [Acc:FBgn0083936]	http://flybase.org/reports/FBgn0083936.html
106903	113566	FBgn0085259	CG34230	CG34230	Negative	-	Positive	No	Negative	Y		http://flybase.org/reports/FBgn0085259.html
103881	114562	FBgn0085271	CG34242	CG34242	Negative	-	Positive	No	Negative	Y		http://flybase.org/reports/FBgn0085271.html	https://www.omim.org/entry/617465	SMIM20	SMIM20
103200	114304	FBgn0085276	CG34247	CG34247	Negative	-	Positive	No	Negative	N		http://flybase.org/reports/FBgn0085276.html
109055	115410	FBgn0085282	CG34253	CG34253	Negative	-	Positive	No	Negative			http://flybase.org/reports/FBgn0085282.html
102586	112076	FBgn0085404	CG34375	CG34375	Negative	-	Positive	No	Negative	N		http://flybase.org/reports/FBgn0085404.html	http://www.omim.org/entry/615609
110077	108597	FBgn0085421	Epac	CG34392	Negative	-	Positive	No	Negative	Y	Exchange protein directly activated by cAMP [Acc:FBgn0085421]	http://flybase.org/reports/FBgn0085421.html	https://www.omim.org/entry/606058	RAPGEF4	RAPGEFL1, RAPGEF5, RAPGEF3, RAPGEF4
107787	108776	FBgn0085453	CG34424	CG34424	Negative	-	Positive	No	Negative	N		http://flybase.org/reports/FBgn0085453.html		ST20-MTHFS	MTHFS, ST20-MTHFS
104104	104021	FBgn0085457	CG34428	CG34428	Negative	-	Positive	No	Negative	Y		http://flybase.org/reports/FBgn0085457.html
107573	107660	FBgn0086370	sra	CG6072	Negative	-	Positive	No	Negative	Y	sarah [Acc:FBgn0086370]	http://flybase.org/reports/FBgn0086370.html	http://www.omim.org/entry/604876	RCAN2	RCAN3, RCAN1, RCAN2
105767	109279	FBgn0086372	lap	CG2520	Negative	-	Positive	No	Negative	Y	like-AP180 [Acc:FBgn0086372]	http://flybase.org/reports/FBgn0086372.html	http://www.omim.org/entry/603025	PICALM	SNAP91, PICALM
107774	102204	FBgn0086448	PIG-Q	CG32578	Negative	-	Positive	No	Negative	Y	Phosphatidylinositol glycan anchor biosynthesis class Q [Acc:FBgn0086448]	http://flybase.org/reports/FBgn0086448.html	http://www.omim.org/entry/605754	PIGQ	PIGQ
105462	104813	FBgn0086676	spin	CG8428	Negative	-	Positive	No	Negative		spinster [Acc:FBgn0086676]	http://flybase.org/reports/FBgn0086676.html	http://www.omim.org/entry/612583	SPNS1	SPNS3, SPNS2, SPNS1
104350	107747	FBgn0086687	Desat1	CG5887	Negative	-	Positive	No	Negative		Desaturase 1 [Acc:FBgn0086687]	http://flybase.org/reports/FBgn0086687.html	http://www.omim.org/entry/604031	SCD5	SCD, SCD5
109525	112801	FBgn0086704	stops	CG31006	Negative	-	Positive	No	Negative		slow termination of phototransduction [Acc:FBgn0086704]	http://flybase.org/reports/FBgn0086704.html		ASB17	ASB17
101200	107120	FBgn0259101	CG42249	CG42249	Negative	-	Positive	No	Negative			http://flybase.org/reports/FBgn0259101.html	http://www.omim.org/entry/129190	NT5E	NT5E
103844	114414	FBgn0259108	futsch	CG34387	Negative	-	Positive	No	Negative	Y		http://flybase.org/reports/FBgn0259108.html	http://www.omim.org/entry/600178	MAP1A	MAP1S, MAP1B, MAP1A
103351	100071	FBgn0259152	Clbn	CG11847	Negative	-	Positive	No	Negative	Y	Caliban [Acc:FBgn0259152]	http://flybase.org/reports/FBgn0259152.html	https://www.omim.org/entry/608378	NEMF	NEMF
108318	103726	FBgn0259167	CG42272	CG42272	Negative	-	Positive	No	Negative	N		http://flybase.org/reports/FBgn0259167.html
104594	110702	FBgn0259173	corn	CG42278	Negative	-	Positive	No	Negative		cornetto [Acc:FBgn0259173]	http://flybase.org/reports/FBgn0259173.html
106215	105080	FBgn0259224	CG42324	CG42324	Negative	-	Positive	No	Negative	N		http://flybase.org/reports/FBgn0259224.html	http://www.omim.org/entry/612658	BEGAIN	TJAP1, BEGAIN
104226	105949	FBgn0259233	CG42331	CG42331	Negative	-	Positive	No	Negative			http://flybase.org/reports/FBgn0259233.html
101208	107166	FBgn0259236	comm3	CG42334	Negative	-	Positive	No	Negative	Y		http://flybase.org/reports/FBgn0259236.html
106021	112813	FBgn0259245	DIP-beta	CG42343	Negative	-	Positive	No	Negative	N	Dpr-interacting protein beta [Acc:FBgn0259245]	http://flybase.org/reports/FBgn0259245.html		IGLON5	LSAMP, NEGR1, NTM, OPCML, IGLON5
110742	107485	FBgn0259483	Mob4	CG3403	Negative	-	Positive	No	Negative		MOB kinase activator 4 [Acc:FBgn0259483]	http://flybase.org/reports/FBgn0259483.html	http://www.omim.org/entry/609361	MOB4	HSPE1-MOB4, MOB4
108102	102619	FBgn0259712	CG42366	CG42366	Negative	-	Positive	No	Negative	Y		http://flybase.org/reports/FBgn0259712.html	http://www.omim.org/entry/612325	ICK	MOK, MAK, ICK
103497	111588	FBgn0259714	DIP-epsilon	CG42368	Negative	-	Positive	No	Negative	Y	Dpr-interacting protein epsilon [Acc:FBgn0259714]	http://flybase.org/reports/FBgn0259714.html	http://www.omim.org/entry/607938	OPCML	IGSF9B, NEGR1, IGLON5, LSAMP, NTM, OPCML
106390	111079	FBgn0259745	wech	CG42396	Negative	-	Positive	No	Negative	Y		http://flybase.org/reports/FBgn0259745.html		TRIM71	TRIM71
107123	113668	FBgn0259748	CG42397	CG42397	Negative	-	Positive	No	Negative	Y		http://flybase.org/reports/FBgn0259748.html
105315	110667	FBgn0259927	CG42450	CG42450	Negative	-	Positive	No	Negative			http://flybase.org/reports/FBgn0259927.html	http://www.omim.org/entry/604067	RGS9	RGS7, RGS11, RGS9
106783	110145	FBgn0259938	cwo	CG17100	Negative	-	Positive	No	Negative		clockwork orange [Acc:FBgn0259938]	http://flybase.org/reports/FBgn0259938.html	http://www.omim.org/entry/606200	HELT	HEY2, HEYL, HEY1, HELT
107423	103625	FBgn0260005	wtrw	CG31284	Negative	-	Positive	No	Negative		water witch [Acc:FBgn0260005]	http://flybase.org/reports/FBgn0260005.html
103032	110343	FBgn0260006	drd	CG33968	Negative	-	Positive	No	Negative	N	drop dead [Acc:FBgn0260006]	http://flybase.org/reports/FBgn0260006.html
106147	102965	FBgn0260397	Su(var)3-3	CG17149	Negative	-	Positive	No	Negative		Suppressor of variegation 3-3 [Acc:FBgn0260397]	http://flybase.org/reports/FBgn0260397.html	http://www.omim.org/entry/609132	KDM1A	KDM1A
102941	113570	FBgn0260428	CG42523	CG42523	Negative	-	Positive	No	Negative	Y		http://flybase.org/reports/FBgn0260428.html
101119	106970	FBgn0260461	Rcd7	CG14098	Negative	-	Positive	No	Negative	N	Reduction in Cnn dots 7 [Acc:FBgn0260461]	http://flybase.org/reports/FBgn0260461.html
101372	108752	FBgn0260657	CG42540	CG42540	Negative	-	Positive	No	Negative	Y		http://flybase.org/reports/FBgn0260657.html	http://www.omim.org/entry/133090	STOM	NPHS2, STOML3, STOM
103063	113572	FBgn0260799	p120ctn	CG17484	Negative	-	Positive	No	Negative	Y	Adherens junction protein p120 [Acc:FBgn0260799]	http://flybase.org/reports/FBgn0260799.html	http://www.omim.org/entry/604275	CTNND2	PKP2, PKP1, PKP3, CTNND1, PKP4, ARVCF, CTNND2
100835	103622	FBgn0260932	cuff	CG13190	Negative	-	Positive	No	Negative	N	cutoff [Acc:FBgn0260932]	http://flybase.org/reports/FBgn0260932.html	http://www.omim.org/entry/605996	DXO	DXO
110660	100368	FBgn0261049	Vps45	CG8228	Negative	-	Positive	No	Negative	Y	Vacuolar protein sorting 45 [Acc:FBgn0261049]	http://flybase.org/reports/FBgn0261049.html	http://www.omim.org/entry/610035	VPS45	VPS45
100893	106161	FBgn0261262	CG42613	CG42613	Negative	-	Positive	No	Negative	N		http://flybase.org/reports/FBgn0261262.html
104674	107556	FBgn0261385	scra	CG2092	Negative	-	Positive	No	Negative	Y	scraps [Acc:FBgn0261385]	http://flybase.org/reports/FBgn0261385.html	http://www.omim.org/entry/616027	ANLN	ANLN
110366	101013	FBgn0261530	nbs	CG6754	Negative	-	Positive	No	Negative	N		http://flybase.org/reports/FBgn0261530.html	http://www.omim.org/entry/602667	NBN	NBN
105645	101314	FBgn0261554	CG42672	CG42672	Negative	-	Positive	No	Negative	Y		http://flybase.org/reports/FBgn0261554.html	http://www.omim.org/entry/615759	KIDINS220	ANKRD50, NKPD1, KIDINS220
108939	101919	FBgn0261561	CG42675	CG42675	Negative	-	Positive	No	Negative	Y		http://flybase.org/reports/FBgn0261561.html		ZC2HC1A	ZC2HC1C, ZC2HC1A
107986	107732	FBgn0261618	larp	CG42551	Negative	-	Positive	No	Negative	N	La related protein [Acc:FBgn0261618]	http://flybase.org/reports/FBgn0261618.html	http://www.omim.org/entry/612059	LARP1B	LARP1B, LARP1
107324	109064	FBgn0261705	CG42741	CG42741	Negative	-	Positive	No	Negative	N		http://flybase.org/reports/FBgn0261705.html	http://www.omim.org/entry/300286	KLF3	KLF2, KLF1, KLF4, KLF12, KLF8, KLF3
104833	113612	FBgn0261788	Ank2	CG42734	Negative	-	Positive	No	Negative		Ankyrin 2 [Acc:FBgn0261788]	http://flybase.org/reports/FBgn0261788.html	http://www.omim.org/entry/106410	ANK2	ANK1, ANK2, ANK3
100685	107407	FBgn0261873	sdt	CG32717	Negative	-	Positive	No	Negative	N	stardust [Acc:FBgn0261873]	http://flybase.org/reports/FBgn0261873.html	https://www.omim.org/entry/606958	MPP5	MPP5
108204	100663	FBgn0261996	CG42814	CG42814	Negative	-	Positive	No	Negative	Y		http://flybase.org/reports/FBgn0261996.html	http://www.omim.org/entry/609219	NUDT14	NUDT14
105217	113885	FBgn0262030	CG42841	CG42841	Negative	-	Positive	No	Negative	Y		http://flybase.org/reports/FBgn0262030.html
107846	103450	FBgn0262160	CG9932	CG9932	Negative	-	Positive	No	Negative			http://flybase.org/reports/FBgn0262160.html	http://www.omim.org/entry/604083	ZNF462	REST, ZNF462
104295	107103	FBgn0262509	nrm	CG43079	Negative	-	Positive	No	Negative	N	neuromusculin [Acc:FBgn0262509]	http://flybase.org/reports/FBgn0262509.html
103697	114374	FBgn0262547	CG43101	CG43101	Negative	-	Positive	No	Negative	N		http://flybase.org/reports/FBgn0262547.html
110150	102017	FBgn0262562	CG43102	CG43102	Negative	-	Positive	No	Negative	Y		http://flybase.org/reports/FBgn0262562.html	http://www.omim.org/entry/617043	ARHGEF17	ARHGEF17
108861	101084	FBgn0262593	Shab	CG43128	Negative	-	Positive	No	Negative	N	Shaker cognate b [Acc:FBgn0262593]	http://flybase.org/reports/FBgn0262593.html	http://www.omim.org/entry/600397	KCNB1	KCNV1, KCNF1, KCNG2, KCNG4, KCNG3, KCNV2, KCNG1, KCNS3, KCNS2, KCNS1, KCNB2, KCNB1
108082	100355	FBgn0262871	lute	CG43226	Negative	-	Positive	No	Negative	Y		http://flybase.org/reports/FBgn0262871.html	http://www.omim.org/entry/615566	BTBD3	BTBD1, BTBD2, BTBD6, BTBD3
104967	112580	FBgn0263023	CG43318	CG43318	Negative	-	Positive	No	Negative	Y		http://flybase.org/reports/FBgn0263023.html
108676	103016	FBgn0263034	CG43329	CG43329	Negative	-	Positive	No	Negative	Y		http://flybase.org/reports/FBgn0263034.html
104168	101478	FBgn0263111	cac	CG43368	Negative	-	Positive	No	Negative	Y	cacophony [Acc:FBgn0263111]	http://flybase.org/reports/FBgn0263111.html	http://www.omim.org/entry/601012	CACNA1B	CACNA1S, CACNA1D, CACNA1E, CACNA1A, CACNA1B
101090	106875	FBgn0263144	bin3	CG8276	Negative	-	Positive	No	Negative	Y	bicoid-interacting protein 3 [Acc:FBgn0263144]	http://flybase.org/reports/FBgn0263144.html	http://www.omim.org/entry/611478	MEPCE	MEPCE
107563	106312	FBgn0263510	nclb	CG6751	Negative	-	Positive	No	Negative	N	no child left behind [Acc:FBgn0263510]	http://flybase.org/reports/FBgn0263510.html		PWP1	PWP1
107707	100561	FBgn0263593	Lpin	CG8709	Negative	-	Positive	No	Negative	Y	Lipin [Acc:FBgn0263593]	http://flybase.org/reports/FBgn0263593.html	http://www.omim.org/entry/605520	LPIN3	LPIN1, LPIN2, LPIN3
110736	102938	FBgn0263594	lost	CG14648	Negative	-	Positive	No	Negative			http://flybase.org/reports/FBgn0263594.html	http://www.omim.org/entry/616820	MTHFSD	MTHFSD
103499	112118	FBgn0263772	CG43689	CG43689	Negative	-	Positive	No	Negative	Y		http://flybase.org/reports/FBgn0263772.html	http://www.omim.org/entry/613084	MYT1L	ST18, MYT1, MYT1L
107821	108411	FBgn0264294	Cyt-b5	CG2140	Negative	-	Positive	No	Negative	Y	Cytochrome b5 [Acc:FBgn0264294]	http://flybase.org/reports/FBgn0264294.html	http://www.omim.org/entry/613218	CYB5A	CYB5B, CYB5A
100401	104177	FBgn0264488	CG43896	CG43896	Negative	-	Positive	No	Negative			http://flybase.org/reports/FBgn0264488.html
102185	111028	FBgn0265139	Gr2a	CG18531	Negative	-	Positive	No	Negative	Y	Gustatory receptor 2a [Acc:FBgn0265139]	http://flybase.org/reports/FBgn0265139.html
109071	115469	FBgn0265191	Glycogenin	CG44244	Negative	-	Positive	No	Negative	Y		http://flybase.org/reports/FBgn0265191.html	http://www.omim.org/entry/603942	GYG1	GYG2, GYG1
102684	112154	FBgn0265413	CG44325	CG44325	Negative	-	Positive	No	Negative			http://flybase.org/reports/FBgn0265413.html
110266	107947	FBgn0265464	Traf6	CG10961	Negative	-	Positive	No	Negative		TNF-receptor-associated factor 6 [Acc:FBgn0265464]	http://flybase.org/reports/FBgn0265464.html	http://www.omim.org/entry/602355	TRAF6	TRAF6
104181	109637	FBgn0265575	yin	CG44402	Negative	-	Positive	No	Negative	Y		http://flybase.org/reports/FBgn0265575.html	https://www.omim.org/entry/602339	SLC15A1	SLC15A4, SLC15A2, SLC15A1
101512	108927	FBgn0265784	CrebB	CG6103	Negative	-	Positive	No	Negative	Y	Cyclic-AMP response element binding protein B [Acc:FBgn0265784]	http://flybase.org/reports/FBgn0265784.html	http://www.omim.org/entry/123810	CREB1	ATF1, CREM, CREB1
103412	100544	FBgn0266582	ND-30	CG12079	Negative	-	Positive	No	Negative	Y	NADH dehydrogenase (ubiquinone) 30 kDa subunit [Acc:FBgn0266582]	http://flybase.org/reports/FBgn0266582	http://www.omim.org/entry/603846	NDUFS3	NDUFS3
101132	103260	FBgn0266708	Cep89	CG8214	Negative	-	Positive	No	Negative		Centrosomal protein 89kDa [Acc:FBgn0266708]	http://flybase.org/reports/FBgn0266708.html	http://www.omim.org/entry/615470	CEP89	CEP89
108209	101630	FBgn0266720	Snap24	CG9474	Negative	-	Positive	No	Negative	Y	Synaptosomal-associated protein 24kDa [Acc:FBgn0266720]	http://flybase.org/reports/FBgn0266720.html	http://www.omim.org/entry/600322	SNAP25	SNAP23, SNAP25
103726	102150	FBgn0266757	mfr	CG5747	Negative	-	Positive	No	Negative	N	misfire [Acc:FBgn0266757]	http://flybase.org/reports/FBgn0266757.html		FER1L6	FER1L5, DYSF, MYOF, FER1L4, OTOF, FER1L6
110310	111772	FBgn0267033	mamo	CG45477	Negative	-	Positive	No	Negative	N	maternal gene required for meiosis [Acc:FBgn0267033]	http://flybase.org/reports/FBgn0267033.html	http://www.omim.org/entry/189906	SP1	SP1
106410	111805	FBgn0267363	JYalpha	CG45760	Negative	-	Positive	No	Negative	N		http://flybase.org/reports/FBgn0267363.html	http://www.omim.org/entry/182360	ATP12A	ATP1A2, ATP1A4, ATP1A1, ATP12A, ATP4A
108331	106716	FBgn0267365	l(2)SH0834	CG5385	Negative	-	Positive	No	Negative	Y	lethal (2) SH0834 [Acc:FBgn0267365]	http://flybase.org/reports/FBgn0267365.html
109995	115662	FBgn0267430	Pzl	CG45783	Negative	-	Positive	No	Negative		Piezo-like [Acc:FBgn0267430]	http://flybase.org/reports/FBgn0267430.html	http://www.omim.org/entry/611184	PIEZO2	PIEZO1, PIEZO2
108888	101883	FBgn0267487	Ptp61F	CG9181	Negative	-	Positive	No	Negative	N	Protein tyrosine phosphatase 61F [Acc:FBgn0267487]	http://flybase.org/reports/FBgn0267487.html	http://www.omim.org/entry/176885	PTPN1	PTPN2, PTPN1
100197	104742	FBgn0267488	Mcr	CG7586	Negative	-	Positive	No	Negative	Y	Macroglobulin complement-related [Acc:FBgn0267488]	http://flybase.org/reports/FBgn0267488	https://www.omim.org/entry/120700	C3	CPAMD8, C3, C4A, C5
102145	110911	FBgn0267796	Tmc	CG46121	Negative	-	Positive	No	Negative		Transmembrane channel-like [Acc:FBgn0267796]	http://flybase.org/reports/FBgn0267796.html	http://www.omim.org/entry/606706	TMC2	TMC3, TMC2, TMC1
108926	100788	FBgn0267823	Gmer	CG3495	Negative	-	Positive	No	Negative	Y	GDP-4-keto-6-deoxy-D-mannose 3,5-epimerase/4-reductase [Acc:FBgn0267823]	http://flybase.org/reports/FBgn0267823.html	http://www.omim.org/entry/137020	TSTA3	TSTA3
101560	109109	FBgn0283450	Glo1	CG1707	Negative	-	Positive	No	Negative		Glyoxalase 1 [Acc:FBgn0283450]	http://flybase.org/reports/FBgn0283450.html	http://www.omim.org/entry/138750	GLO1	GLO1
110459	101939	FBgn0283478	und	CG4008	Negative	-	Positive	No	Negative	Y	uninitiated [Acc:FBgn0283478]	http://flybase.org/reports/FBgn0025117.html	http://www.omim.org/entry/601870	METAP2	METAP2
103604	101622	FBgn0283510	Pal1	CG12130	Negative	-	Positive	No	Negative	N	Peptidyl-alpha-hydroxyglycine-alpha-amidating lyase 1 [Acc:FBgn0283510]	http://flybase.org/reports/FBgn0283510.html	http://www.omim.org/entry/170270	PAM	NHLRC3, PAM
102987	112990	FBgn0283625	CG46298	CG46298	Negative	-	Positive	No	Negative	Y		http://flybase.org/reports/FBgn0250840.html
107745	108605	FBgn0283666	Rap2l	CG3204	Negative	-	Positive	No	Negative	Y	Ras-associated protein 2-like [Acc:FBgn0283666]	http://flybase.org/reports/FBgn0283666.html	http://www.omim.org/entry/179541	RAP2B	NRAS, RRAS, RRAS2, HRAS, RAP1A, RAP1B, RAP2C, RAP2A, RAP2B
101755	109433	FBgn0285962	CG46338	CG46338	Negative	-	Positive	No	Negative			http://flybase.org/reports/FBgn0011241.html	http://www.omim.org/entry/608483	AKTIP	AKTIP
106386	110752	FBgn0285971	prg	CG9233	Negative	-	Positive	No	Negative	N	piragua [Acc:FBgn0285971]	http://flybase.org/reports/FBgn0029173.html
100334	105962	FBgn0004359	T48	CG5507	Negative	-	Positive	No	nd	Y	Transcript 48 [Acc:FBgn0004359]	http://flybase.org/reports/FBgn0004359.html
108409	109352	FBgn0013751	Awh	CG1072	Negative	-	Positive	No	nd	Y	Arrowhead [Acc:FBgn0013751]	http://flybase.org/reports/FBgn0013751.html	http://www.omim.org/entry/604425	LHX8	LHX6, LHX8
101333	107625	FBgn0025109	Bem46	CG18642	Negative	-	Positive	No	nd	Y		http://flybase.org/reports/FBgn0025109.html		ABHD13	ABHD13
108492	111922	FBgn0030351	CG1840	CG1840	Negative	-	Positive	No	nd	Y		http://flybase.org/reports/FBgn0030351.html	http://www.omim.org/entry/607916	SELENOK	SELENOK
104591	110575	FBgn0030570	CG12540	CG12540	Negative	-	Positive	No	nd	Y		http://flybase.org/reports/FBgn0030570.html
100466	104427	FBgn0039531	CG5611	CG5611	Negative	-	Positive	No	nd	Y		http://flybase.org/reports/FBgn0039531.html
109100	115537	FBgn0039664	CG2006	CG2006	Negative	-	Positive	No	nd	Y		http://flybase.org/reports/FBgn0039664.html		DTWD1	DTWD1
107130	100051	FBgn0003731	Egfr	CG10079	Negative	-	Negative	-	Positive		Epidermal growth factor receptor [Acc:FBgn0003731]	http://flybase.org/reports/FBgn0003731.html	http://www.omim.org/entry/600543	ERBB4	ERBB3, ERBB2, ERBB4, EGFR
105498	109233	FBgn0004638	drk	CG6033	Negative	-	Negative	-	Positive		downstream of receptor kinase [Acc:FBgn0004638]	http://flybase.org/reports/FBgn0004638.html	http://www.omim.org/entry/108355	GRB2	GRAPL, GRAP2, GRAP, GRB2
107784	108454	FBgn0010638	Sec61beta	CG10130	Negative	-	Negative	-	Positive		Sec61 beta subunit [Acc:FBgn0010638]	http://flybase.org/reports/FBgn0010638.html	http://www.omim.org/entry/609214	SEC61B	SEC61B
110599	108706	FBgn0011726	tsr	CG4254	Negative	-	Negative	-	Positive		twinstar [Acc:FBgn0011726]	http://flybase.org/reports/FBgn0011726.html	http://www.omim.org/entry/601443	DSTN	CFL1, CFL2, DSTN
101456	109213	FBgn0013749	Arf102F	CG11027	Negative	-	Negative	-	Positive		ADP ribosylation factor at 102F [Acc:FBgn0013749]	http://flybase.org/reports/FBgn0013749.html	http://www.omim.org/entry/601177	ARF4	ARF1, ARF3, ARF5, ARF4
106093	108238	FBgn0015019	CCT3	CG8977	Negative	-	Negative	-	Positive		Chaperonin containing TCP1 subunit 3 [Acc:FBgn0015019]	http://flybase.org/reports/FBgn0015019.html	http://omim.org/entry/600114	CCT3	CCT3
108558	100827	FBgn0015509	Cul1	CG1877	Negative	-	Negative	-	Positive		Cullin 1 [Acc:FBgn0015509]	http://flybase.org/reports/FBgn0015509.html	http://omim.org/entry/603134	CUL1	CUL1
103702	100406	FBgn0015776	nrv1	CG9258	Negative	-	Negative	-	Positive		nervana 1 [Acc:FBgn0015776]	http://flybase.org/reports/FBgn0015776.html	http://www.omim.org/entry/182330	ATP1B1	ATP4B, ATP1B4, ATP1B3, ATP1B2, ATP1B1
107304	108243	FBgn0015818	Spx	CG3780	Negative	-	Negative	-	Positive		Spliceosomal protein on the X [Acc:FBgn0015818]	http://flybase.org/reports/FBgn0015818.html	http://omim.org/entry/605593	SF3B4	SF3B4
106980	100519	FBgn0016917	Stat92E	CG4257	Negative	-	Negative	-	Positive		Signal-transducer and activator of transcription protein at 92E [Acc:FBgn0016917]	http://flybase.org/reports/FBgn0016917.html	https://www.omim.org/entry/604260	STAT5B	STAT3, STAT4, STAT2, STAT1, STAT6, STAT5A, STAT5B
103561	101197	FBgn0019949	Cdk9	CG5179	Negative	-	Negative	-	Positive		Cyclin-dependent kinase 9 [Acc:FBgn0019949]	http://flybase.org/reports/FBgn0019949.html	http://www.omim.org/entry/603251	CDK9	CDK13, CDK12, CDK9
104179	109296	FBgn0020622	Pi3K21B	CG2699	Negative	-	Negative	-	Positive			http://flybase.org/reports/FBgn0020622.html	http://www.omim.org/entry/606076	PIK3R3	PIK3R1, PIK3R2, PIK3R3
103560	101194	FBgn0023167	SmD3	CG8427	Negative	-	Negative	-	Positive		Small ribonucleoprotein particle protein SmD3 [Acc:FBgn0023167]	http://flybase.org/reports/FBgn0023167.html	http://www.omim.org/entry/601062	SNRPD3	SNRPD3
108821	113214	FBgn0023170	RpL39	CG3997	Negative	-	Negative	-	Positive		Ribosomal protein L39 [Acc:FBgn0023170]	http://flybase.org/reports/FBgn0023170.html	http://www.omim.org/entry/300899	RPL39	RPL39P5, RPL39L, RPL39
106918	100421	FBgn0024998	CG2685	CG2685	Negative	-	Negative	-	Positive			http://flybase.org/reports/FBgn0024998.html		WBP11	WBP11
100004	102901	FBgn0025830	IntS8	CG5859	Negative	-	Negative	-	Positive		Integrator 8 [Acc:FBgn0025830]	http://flybase.org/reports/FBgn0025830.html	http://omim.org/entry/611351	INTS8	INTS8
104672	102374	FBgn0027087	HisRS	CG6335	Negative	-	Negative	-	Positive		Histidyl-tRNA synthetase [Acc:FBgn0027087]	http://flybase.org/reports/FBgn0027087.html	http://www.omim.org/entry/142810	HARS	HARS2, HARS
101467	109250	FBgn0028688	Rpn7	CG5378	Negative	-	Negative	-	Positive		Regulatory particle non-ATPase 7 [Acc:FBgn0028688]	http://flybase.org/reports/FBgn0028688.html		PSMD6	PSMD6
101441	109170	FBgn0030365	Tango4	CG1796	Negative	-	Negative	-	Positive		Transport and Golgi organization 4 [Acc:FBgn0030365]	http://flybase.org/reports/FBgn0030365.html	http://www.omim.org/entry/605961	PLRG1	PLRG1
106099	108551	FBgn0032444	CCT4	CG5525	Negative	-	Negative	-	Positive		Chaperonin containing TCP1 subunit 4 [Acc:FBgn0032444]	http://flybase.org/reports/FBgn0032444.html	http://omim.org/entry/605142	CCT4	CCT4
105819	100261	FBgn0032987	RpL21	CG12775	Negative	-	Negative	-	Positive		Ribosomal protein L21 [Acc:FBgn0032987]	http://flybase.org/reports/FBgn0032987.html	http://www.omim.org/entry/603636	RPL21	RPL21
100530	106365	FBgn0034827	Klp59D	CG12192	Negative	-	Negative	-	Positive		Kinesin-like protein at 59D [Acc:FBgn0034827]	http://flybase.org/reports/FBgn0034827.html	http://www.omim.org/entry/602591	KIF2A	KIF2C, KIF2B, KIF2A
109345	114901	FBgn0036213	RpL10Ab	CG7283	Negative	-	Negative	-	Positive		Ribosomal protein L10Ab [Acc:FBgn0036213]	http://flybase.org/reports/FBgn0036213.html	http://www.omim.org/entry/615660	RPL10A	RPL10A
103926	102825	FBgn0036761	MED19	CG5546	Negative	-	Negative	-	Positive		Mediator complex subunit 19 [Acc:FBgn0036761]	http://flybase.org/reports/FBgn0036761.html	http://omim.org/entry/612385	MED19	MED19
106891	111944	FBgn0039114	Lsd-1	CG10374	Negative	-	Negative	-	Positive		Lipid storage droplet-1 [Acc:FBgn0039114]	http://flybase.org/reports/FBgn0039114.html	http://www.omim.org/entry/602702	PLIN3	PLIN1, PLIN2, PLIN5, PLIN3
109994	115644	FBgn0039406	RpL34a	CG6090	Negative	-	Negative	-	Positive		Ribosomal protein L34a [Acc:FBgn0039406]	http://flybase.org/reports/FBgn0039406.html	http://www.omim.org/entry/616862	RPL34	RPL34
103483	105732	FBgn0040075	rept	CG9750	Negative	-	Negative	-	Positive		reptin [Acc:FBgn0040075]	http://flybase.org/reports/FBgn0040075.html	http://omim.org/entry/604788	RUVBL2	RUVBL2
101990	108365	FBgn0250746	Prosbeta7	CG12000	Negative	-	Negative	-	Positive		Proteasome beta7 subunit [Acc:FBgn0250746]	http://flybase.org/reports/FBgn0250746.html	http://www.omim.org/entry/602177	PSMB4	PSMB4
104210	104382	FBgn0260004	Snmp1	CG7000	Negative	-	Negative	-	Positive		Sensory neuron membrane protein 1 [Acc:FBgn0260004]	http://flybase.org/reports/FBgn0260004.html	http://www.omim.org/entry/602257	SCARB1	SCARB2, CD36, SCARB1
105279	107652	FBgn0261592	RpS6	CG10944	Negative	-	Negative	-	Positive		Ribosomal protein S6 [Acc:FBgn0261592]	http://flybase.org/reports/FBgn0261592.html	http://omim.org/entry/180460	RPS6	RPS6
103905	100186	FBgn0284436	CCT8	CG8258	Negative	-	Negative	-	Positive		Chaperonin containing TCP1 subunit 8 [Acc:FBgn0284436]	http://flybase.org/reports/FBgn0033342.html	https://www.omim.org/entry/617786	CCT8	CCT8L2, CCT8
109149	115913	FBgn0085194	CG34165	CG34165	Negative	-	nd	-	Positive			http://flybase.org/reports/FBgn0085194.html
102861	105595	FBgn0028526	CG15293	CG15293	nd	-	Positive	No	Negative	N		http://flybase.org/reports/FBgn0028526.html
101554	109063	FBgn0029118	Sucb	CG10622	nd	-	Positive	No	Negative	N		http://flybase.org/reports/FBgn0029118.html	http://www.omim.org/entry/603922	SUCLG2	SUCLA2, SUCLG2
110456	101920	FBgn0031893	MICU1	CG4495	nd	-	Positive	No	Negative	N	Mitochondrial calcium uptake 1 [Acc:FBgn0031893]	http://flybase.org/reports/FBgn0031893.html	http://www.omim.org/entry/605084	MICU1	MICU1
106045	100523	FBgn0034735	CG4610	CG4610	nd	-	Positive	No	Negative	Y		http://flybase.org/reports/FBgn0034735.html	http://www.omim.org/entry/614667	MTO1	MTO1
100149	105048	FBgn0036454	CG17839	CG17839	nd	-	Positive	No	Negative	N		http://flybase.org/reports/FBgn0036454.html
103061	112169	FBgn0038611	CG14309	CG14309	nd	-	Positive	No	Negative			http://flybase.org/reports/FBgn0038611.html	http://www.omim.org/entry/613469	HPSE2	HPSE2
107240	105131	FBgn0053109	CG33109	CG33109	nd	-	Positive	No	Negative	N		http://flybase.org/reports/FBgn0053109.html
100500	104531	FBgn0038251	Hexim	CG3508	nd	-	Positive	No	nd	Y	Hexamethylene bisacetamide inducible [Acc:FBgn0038251]	http://flybase.org/reports/FBgn0038251.html	http://www.omim.org/entry/607328	HEXIM1	HEXIM2, HEXIM1

## Sheet: Table S1B IHC summary 
CG Number	Trans-ID	Positive in Yki/EGFR Screen	Gene Name	Gene Symbol	IHC status
					MMP1 increased	Polarity perturbation
						D-cad	Phalloidin
CG18505	105745	YKI	Acylphosphatase 2	Acyp2	Negative	Negative	Positive
CG32333	100303	YKI	CG32333		Negative	Positive	Positive
CG14071	104291	YKI	CG14071		Positive	Positive	Positive
CG12272	107954	YKI	Strumpellin	Strumpellin	Positive	Positive	Negative
CG42588	100428	YKI	CG42588		Positive	Positive	Negative
CG15824	101232	YKI	CG15824		Negative	Positive	Negative
CG12692	109683	YKI	CG12692		Negative	Positive	Positive
CG5151	102455	YKI	CG5151		Negative	Positive	Positive
CG5125	110702	YKI	neither inactivation nor afterpotential C	ninaC	Positive	Positive	Positive
CG33346	100352	YKI	CG33346		Positive	Positive	Positive
CG14966	100821	YKI	CG14966		Positive	Positive	Positive
CG6947/CG43896	100401	YKI	CG43896		Positive	Positive	Positive
CG32548	104969	YKI	CG32548		Positive	Negative	Positive
CG30421	103553	YKI	Ubiquitin specific protease 15/31	Usp15-31	Negative	Negative	Positive
CG9241	103568	YKI	Minichromosome maintenance 10	Mcm10	Positive	Positive	Positive
CG4109	107014	YKI	Syntaxin 8	Syx8	Negative	Positive	Positive
CG6751	107563	YKI	No Child Left Behind	NCLB	Positive	Positive	Positive
CG4008	110459	YKI	uninitiated	und	Positive	Positive	Positive
CG8948	110812	YKI	GTPase regulator associated with FAK	Graf	Positive	Positive	Positive
CG5874	106245	YKI	Negative elongation Factor A	Nelf-A	Positive	Positive	Positive
CG10521	100840	YKI	Netrin-B	NetB	Negative	Negative	Positive
CG32816	100838	YKI	CG32816		Negative	Negative	Positive
CG3352	108863	EGFR	fat	ft	Negative	Positive	Positive
CG31926	107437	EGFR	CG31926		Positive	Positive	Positive
CG42857	103539	EGFR	CG42857		Positive	Positive	Positive
